# Supplementary material for: Lower Airway Dysbiosis Affects Lung Cancer Progression
Source: Oxford University Press journal article supplement (doi:10.1158/2159-8290.cd-20-0263), 2020-11-11
Supplement: 21598290cd200263-sup-237009_2_supp_6674324_q9prg1.xlsx [file 21598290cd200263-sup-237009_2_supp_6674324_q9prg1.xlsx]

## Sheet: Table 1 NSCLC I-IIIA vs IIIB-IV
Phylum	Class	Order	Family	Genus	Specie	OTU#		logFC	pvalue	adj.P.Val	abundance.advanced	abundance.local
OTU enriched in local stage
p__Actinobacteria	c__Actinobacteria	o__Actinomycetales	f__	g__	s__	12297		-6.90353	9.16383e-07	0.000218668	0.00472468	0.0228296
p__Firmicutes	c__Clostridia	o__Clostridiales	f__Lachnospiraceae	g__	s__	537098		-4.48095	0.0174773	0.169676	4.78851e-05	0.000268015
p__Firmicutes	c__Bacilli	o__Lactobacillales	f__Lactobacillaceae	g__Lactobacillus	s__	1107027		-3.59719	0.0334698	0.243885	0.000162461	0.00104143
p__Cyanobacteria	c__Chloroplast	o__Cryptophyta	f__	g__	s__	209603		-3.58142	0.0320775	0.243885	2.35364e-05	0.000423634
p__Firmicutes	c__Clostridia	o__Clostridiales	f__Clostridiaceae	g__Clostridium	s__	1136403		-3.50645	0.0194626	0.181392	0.000633376	0.000626714
p__Planctomycetes	c__Planctomycetia	o__Gemmatales	f__Isosphaeraceae	g__	s__	685193		-3.32861	0.0212327	0.194008	0.000108764	0.000769154
p__Bacteroidetes	c__Cytophagia	o__Cytophagales	f__Cytophagaceae	g__	s__	616971		-3.13856	0.0298631	0.243885	8.39866e-05	0.000261946
p__Actinobacteria	c__Actinobacteria	o__Actinomycetales	f__ACK-M1	g__	s__	830978		-3.1086	0.00158605	0.041061	0.000173276	0.000623617
p__Verrucomicrobia	c__Verrucomicrobiae	o__Verrucomicrobiales	f__Verrucomicrobiaceae	g__Prosthecobacter	s__debontii	950620		-2.95233	0.000168922	0.00983972	9.66726e-05	0.00111969
p__Armatimonadetes	c__Armatimonadia	o__Armatimonadales	f__Armatimonadaceae	g__Armatimonas	s__	141815		-2.89141	0.012292	0.139709	9.40584e-05	0.000389697
p__Actinobacteria	c__Actinobacteria	o__Actinomycetales	f__Corynebacteriaceae	g__Corynebacterium	s__	441265		-2.77743	0.00209333	0.0461648	0.00154108	0.00671828
p__Firmicutes	c__Bacilli	o__Lactobacillales	f__Carnobacteriaceae	g__Granulicatella	s__	1027587		-2.77397	3.77056e-06	0.00043927	0.0154424	0.0218996
p__Bacteroidetes	c__Flavobacteriia	o__Flavobacteriales	f__Flavobacteriaceae	g__Flavobacterium	s__	605681		-2.68642	0.0121308	0.139709	9.15353e-05	0.000734109
p__Actinobacteria	c__Acidimicrobiia	o__Acidimicrobiales	f__	g__	s__	510547		-2.61165	0.014434	0.152869	0.000144016	0.000294883
p__Proteobacteria	c__Betaproteobacteria	o__Methylophilales	f__Methylophilaceae	g__	s__	802011		-2.54887	0.00352295	0.0593448	0.000373177	0.00149258
p__Actinobacteria	c__Actinobacteria	o__Actinomycetales	f__ACK-M1	g__	s__	242577		-2.1289	0.027469	0.243885	0.00029276	0.00103128
p__Proteobacteria	c__Gammaproteobacteria	o__Enterobacteriales	f__Enterobacteriaceae	g__	s__	528421		-2.03088	0.0291336	0.243885	3.92077e-05	0.000232899
p__Proteobacteria	c__Betaproteobacteria	o__Burkholderiales	f__Comamonadaceae	g__Aquabacterium	s__	942852		-1.7431	0.017034	0.168891	0.000574471	0.00191521
p__Bacteroidetes	c__Bacteroidia	o__Bacteroidales	f__Prevotellaceae	g__Prevotella	s__melaninogenica	4298291		-1.28739	0.0328602	0.243885	3.74074e-05	8.26365e-05
p__Bacteroidetes	c__Cytophagia	o__Cytophagales	f__Cytophagaceae	g__	s__	304640		-1.12955	0.0135579	0.146929	0.00188254	0.00438698
OTU enriched in advance stage
p__Firmicutes	c__Bacilli	o__Lactobacillales	f__Streptococcaceae	g__Streptococcus	s__	529233		0.783273	0.0347088	0.243885	0.000151783	9.64024e-05
p__Proteobacteria	c__Gammaproteobacteria	o__Pasteurellales	f__Pasteurellaceae	g__Haemophilus	s__	243777		1.01429	0.03348	0.243885	9.16591e-05	6.22095e-05
p__Firmicutes	c__Bacilli	o__Lactobacillales	f__Streptococcaceae	g__Streptococcus	s__	931950		1.01911	0.0296124	0.243885	8.30889e-05	4.29517e-05
p__Firmicutes	c__Bacilli	o__Lactobacillales	f__Streptococcaceae	g__Streptococcus	s__	4303294		1.03115	0.00741769	0.0960178	0.000179706	0.000102755
p__Proteobacteria	c__Gammaproteobacteria	o__Pasteurellales	f__Pasteurellaceae	g__Haemophilus	s__	153997		1.09251	0.033793	0.243885	0.000106761	5.52941e-05
p__Proteobacteria	c__Gammaproteobacteria	o__Pasteurellales	f__Pasteurellaceae	g__Actinobacillus	s__	359779		1.09937	0.035065	0.243885	7.79886e-05	4.7193e-05
p__Firmicutes	c__Clostridia	o__Clostridiales	f__Veillonellaceae	g__Veillonella	s__parvula	114821		1.19539	0.0162878	0.168669	0.000112361	4.54767e-05
p__Proteobacteria	c__Gammaproteobacteria	o__Pasteurellales	f__Pasteurellaceae	g__Aggregatibacter	s__	897109		1.22587	0.012119	0.139709	0.000563151	0.000208504
p__Proteobacteria	c__Gammaproteobacteria	o__Pasteurellales	f__Pasteurellaceae	g__Haemophilus	s__	4305793		1.25529	0.0132433	0.146929	0.00010415	5.62168e-05
p__Proteobacteria	c__Gammaproteobacteria	o__Pasteurellales	f__Pasteurellaceae	g__	s__	1086274		1.32019	0.00385342	0.0619205	0.000537462	0.000268159
p__Proteobacteria	c__Gammaproteobacteria	o__Pasteurellales	f__Pasteurellaceae	g__Haemophilus	s__parainfluenzae	865469		1.35821	0.00417491	0.0627583	0.0321912	0.0157411
p__Actinobacteria	c__Actinobacteria	o__Actinomycetales	f__Actinomycetaceae	g__Actinomyces	s__	1108638		1.43799	0.0343788	0.243885	0.00133629	0.00223659
p__Proteobacteria	c__Betaproteobacteria	o__Burkholderiales	f__Comamonadaceae	g__Acidovorax	s__	931643		1.44017	0.0316225	0.243885	0.000242	0.000118534
p__Proteobacteria	c__Gammaproteobacteria	o__Pseudomonadales	f__Pseudomonadaceae	g__Pseudomonas	s__	646549		1.50991	0.00356578	0.0593448	0.0176852	0.00389697
p__Proteobacteria	c__Gammaproteobacteria	o__Pasteurellales	f__Pasteurellaceae	g__Haemophilus	s__	341460		1.53708	0.00222421	0.0461648	0.000395616	0.000134978
p__Bacteroidetes	c__Flavobacteriia	o__Flavobacteriales	f__Flavobacteriaceae	g__Flavobacterium	s__	143021		1.5566	0.0339399	0.243885	0.000254547	8.02155e-05
p__Firmicutes	c__Bacilli	o__Lactobacillales	f__Enterococcaceae	g__Enterococcus	s__	1111582		1.56612	0.00128386	0.0351928	0.0010325	0.000463712
p__Proteobacteria	c__Gammaproteobacteria	o__Pasteurellales	f__Pasteurellaceae	g__Haemophilus	s__	414943		1.61124	0.0071515	0.0960178	0.000131874	3.84754e-05
p__Actinobacteria	c__Actinobacteria	o__Actinomycetales	f__Actinomycetaceae	g__Actinomyces	s__	510422		1.62595	0.0317912	0.243885	0.0027707	0.00102114
p__Bacteroidetes	c__Bacteroidia	o__Bacteroidales	f__Prevotellaceae	g__Prevotella	s__melaninogenica	535359		1.62675	0.00618027	0.0872729	0.00200325	0.000735564
p__Fusobacteria	c__Fusobacteriia	o__Fusobacteriales	f__Fusobacteriaceae	g__Fusobacterium	s__	938948		1.6865	0.00244872	0.047546	0.0199935	0.00726313
p__Proteobacteria	c__Betaproteobacteria	o__Burkholderiales	f__Comamonadaceae	g__Aquincola	s__tertiaricarbonis	940737		1.79466	0.00197688	0.0460614	0.000760204	0.000439475
p__Firmicutes	c__Bacilli	o__Gemellales	f__Gemellaceae	g__	s__	1074210		1.82546	0.00227852	0.0461648	0.012654	0.00507062
p__Proteobacteria	c__Alphaproteobacteria	o__Rhizobiales	f__Bradyrhizobiaceae	g__Pseudomonas	s__carboxydohydrogena	709971		1.90311	0.0328577	0.243885	0.000219707	0.000236982
p__Cyanobacteria	c__Chloroplast	o__Streptophyta	f__	g__	s__	769222		1.95616	0.00938282	0.118173	0.00457736	0.00094669
p__Fusobacteria	c__Fusobacteriia	o__Fusobacteriales	f__Leptotrichiaceae	g__Leptotrichia	s__	324532		2.09757	0.00110302	0.0321255	8.22617e-05	4.03773e-05
p__Bacteroidetes	c__Bacteroidia	o__Bacteroidales	f__Prevotellaceae	g__Prevotella	s__	515747		2.17057	0.0110944	0.136052	0.00562227	0.00140944
p__Bacteroidetes	c__Bacteroidia	o__Bacteroidales	f__[Paraprevotellaceae]	g__[Prevotella]	s__tannerae	2714267		2.22949	0.0191597	0.181392	0.00884966	0.00192481
p__Proteobacteria	c__Alphaproteobacteria	o__Rhizobiales	f__Bradyrhizobiaceae	g__	s__	580625		2.34586	0.00315211	0.0577902	0.00963677	0.00759602
p__Fusobacteria	c__Fusobacteriia	o__Fusobacteriales	f__Fusobacteriaceae	g__Fusobacterium	s__	545299		2.40436	5.57142e-05	0.00370897	0.000412377	9.05815e-05
p__Bacteroidetes	c__Flavobacteriia	o__Flavobacteriales	f__Flavobacteriaceae	g__Capnocytophaga	s__ochracea	4295289		2.53391	0.00322434	0.0577902	7.48452e-05	1.69427e-05
p__Proteobacteria	c__Alphaproteobacteria	o__Rhizobiales	f__Bradyrhizobiaceae	g__Bradyrhizobium	s__	1105814		2.63479	0.000331107	0.0140269	0.000244261	0.000158731
p__Bacteroidetes	c__Bacteroidia	o__Bacteroidales	f__Prevotellaceae	g__Prevotella	s__	1004910		2.66196	0.000419456	0.0150359	0.00314776	0.00134479
p__Fusobacteria	c__Fusobacteriia	o__Fusobacteriales	f__Leptotrichiaceae	g__Leptotrichia	s__	4307303		2.82108	0.0072369	0.0960178	0.000112297	3.15429e-05
p__Bacteroidetes	c__Flavobacteriia	o__Flavobacteriales	f__Flavobacteriaceae	g__Capnocytophaga	s__ochracea	987790		2.88983	0.000824734	0.0274519	0.00292124	0.000748703
p__Proteobacteria	c__Betaproteobacteria	o__Neisseriales	f__Neisseriaceae	g__	s__	761024		3.0201	0.000958304	0.0297713	0.000174869	0.000265481
p__Bacteroidetes	c__Bacteroidia	o__Bacteroidales	f__Porphyromonadaceae	g__Tannerella	s__	165107		3.1739	0.00612927	0.0872729	0.000169667	2.35336e-05
p__Bacteroidetes	c__Bacteroidia	o__Bacteroidales	f__Porphyromonadaceae	g__Tannerella	s__	4406621		3.61038	0.00176904	0.043388	0.000520094	6.37925e-05
p__Firmicutes	c__Clostridia	o__Clostridiales	f__[Tissierellaceae]	g__Parvimonas	s__	1866742		3.91712	0.00407336	0.0627583	0.000744536	6.64397e-05
p__Proteobacteria	c__Gammaproteobacteria	o__Pseudomonadales	f__Moraxellaceae	g__Moraxella	s__	1083037		4.22055	0.000208275	0.010784	0.0212501	0.000567574
p__Actinobacteria	c__Actinobacteria	o__Actinomycetales	f__Micrococcaceae	g__Rothia	s__aeria	4297838		4.30559	3.61419e-05	0.00280702	0.000369579	5.8002e-05
p__Firmicutes	c__Bacilli	o__Lactobacillales	f__Aerococcaceae	g__Alloiococcus	s__	1075821		4.31008	0.0168432	0.168891	0.00342629	9.8106e-05
p__Actinobacteria	c__Actinobacteria	o__Actinomycetales	f__Corynebacteriaceae	g__Corynebacterium	s__	1080820		4.57985	0.000411567	0.0150359	0.000807917	0.000107561
p__Bacteroidetes	c__Bacteroidia	o__Bacteroidales	f__[Paraprevotellaceae]	g__[Prevotella]	s__	269907		4.58712	0.000254631	0.0118658	0.00437301	0.000343066
p__Fusobacteria	c__Fusobacteriia	o__Fusobacteriales	f__Leptotrichiaceae	g__Leptotrichia	s__	4306055		4.618	2.60469e-05	0.00242757	0.00113779	3.32445e-05
p__Proteobacteria	c__Gammaproteobacteria	o__Pasteurellales	f__Pasteurellaceae	g__	s__	579141		6.54393	1.40774e-06	0.000218668	0.00173957	1.45402e-05
p__Proteobacteria	c__Gammaproteobacteria	o__Xanthomonadales	f__Xanthomonadaceae	g__	s__	707290		10.0362	1.0779e-06	0.000218668	0.0100769	0.00452215

## Sheet: Table 2 16s 6 month I-IIIA
Phylum	Class	Order	Family	Genus	Specie	OTU#		logFC	pvalue	adj.P.Val	abundance.Alive.Localsix	abundance.Dead.Localsix
OTU enriched in > 6 Months Survival
p__Cyanobacteria	c__Chloroplast	o__Streptophyta	f__	g__	s__	769222		-21.3747	1.33178e-23	2.34393e-21	0.00110492	0
p__Actinobacteria	c__Actinobacteria	o__Actinomycetales	f__Actinomycetaceae	g__Actinomyces	s__	875735		-21.1844	1.10427e-15	9.71759e-14	0.000841602	0.0004038
p__Bacteroidetes	c__Bacteroidia	o__Bacteroidales	f__Prevotellaceae	g__Prevotella	s__	73324		-20.1031	3.03828e-12	1.78246e-10	0.000800582	0
p__Planctomycetes	c__Planctomycetia	o__Planctomycetales	f__Planctomycetaceae	g__Planctomyces	s__	385507		-19.6128	1.36992e-10	6.02765e-09	0.00155114	0
p__Bacteroidetes	c__Bacteroidia	o__Bacteroidales	f__[Paraprevotellaceae]	g__[Prevotella]	s__	4310396		-10.0972	2.36713e-06	8.33229e-05	0.00512636	2.7142e-06
p__Bacteroidetes	c__Bacteroidia	o__Bacteroidales	f__Prevotellaceae	g__Prevotella	s__pallens	705241		-8.77453	4.33473e-05	0.00108987	0.0068789	1.2615e-05
p__Proteobacteria	c__Alphaproteobacteria	o__Rhizobiales	f__Methylobacteriaceae	g__Methylobacterium	s__adhaesivum	591699		-8.55966	0.00299232	0.0292582	0.00783639	3.97422e-06
p__Bacteroidetes	c__Bacteroidia	o__Bacteroidales	f__Prevotellaceae	g__Prevotella	s__nanceiensis	898309		-7.98165	0.0186457	0.121542	0.00371588	2.7142e-06
p__Firmicutes	c__Clostridia	o__Clostridiales	f__Lachnospiraceae	g__	s__	922397		-6.07514	0.00588997	0.0518317	0.000443242	0
p__Firmicutes	c__Erysipelotrichi	o__Erysipelotrichales	f__Erysipelotrichaceae	g__Bulleidia	s__moorei	851938		-6.04736	0.00951904	0.0761523	0.000719744	0
p__Actinobacteria	c__Actinobacteria	o__Actinomycetales	f__Dermacoccaceae	g__Dermacoccus	s__	369064		-5.76235	0.0398355	0.184501	0.000956237	0.000127175
p__Planctomycetes	c__Planctomycetia	o__Planctomycetales	f__Planctomycetaceae	g__Planctomyces	s__	2553032		-5.75775	0.0112046	0.0857396	0.00103327	0.000425241
p__Fusobacteria	c__Fusobacteriia	o__Fusobacteriales	f__Fusobacteriaceae	g__Fusobacterium	s__	938948		-5.52913	0.000261207	0.00459724	0.00761931	0.000123328
p__Proteobacteria	c__Alphaproteobacteria	o__Sphingomonadales	f__Sphingomonadaceae	g__Sphingomonas	s__	1108960		-5.47289	0.000549656	0.00744149	0.00161647	0.000196682
p__Verrucomicrobia	c__Verrucomicrobiae	o__Verrucomicrobiales	f__Verrucomicrobiaceae	g__Luteolibacter	s__	973942		-5.46745	0.00802937	0.0672938	0.00112952	0.00107304
p__Bacteroidetes	c__Flavobacteriia	o__Flavobacteriales	f__Flavobacteriaceae	g__Capnocytophaga	s__ochracea	987790		-5.44346	0.0501263	0.215177	0.000861076	0
p__Proteobacteria	c__Gammaproteobacteria	o__Pasteurellales	f__Pasteurellaceae	g__Actinobacillus	s__parahaemolyticus	893979		-5.33729	0.00205075	0.0225582	0.00264526	7.78025e-05
p__Firmicutes	c__Bacilli	o__Lactobacillales	f__Carnobacteriaceae	g__Granulicatella	s__	1027587		-5.27391	0.000790394	0.00993638	0.0245491	0.000326663
p__Fusobacteria	c__Fusobacteriia	o__Fusobacteriales	f__Leptotrichiaceae	g__Leptotrichia	s__	1927234		-5.12652	0.0358741	0.180395	0.00262612	0.00102372
p__Firmicutes	c__Clostridia	o__Clostridiales	f__Lachnospiraceae	g__Moryella	s__	714766		-5.0906	0.0307951	0.162655	0.000782726	2.46049e-05
p__Spirochaetes	c__[Leptospirae]	o__[Leptospirales]	f__Leptospiraceae	g__Turneriella	s__	4017244		-5.04862	0.0467976	0.211189	0.00129551	0
p__Proteobacteria	c__Gammaproteobacteria	o__Pasteurellales	f__Pasteurellaceae	g__Actinobacillus	s__	2647328		-5.00092	0.0634749	0.224325	0.00142347	0
p__Actinobacteria	c__Actinobacteria	o__Actinomycetales	f__Corynebacteriaceae	g__Corynebacterium	s__	441265		-4.98594	0.0136493	0.0960908	0.00812947	0.000112008
p__Firmicutes	c__Clostridia	o__Clostridiales	f__[Mogibacteriaceae]	g__Mogibacterium	s__	531206		-4.9674	0.062283	0.224325	0.000367465	0
p__Proteobacteria	c__Alphaproteobacteria	o__Rickettsiales	f__	g__	s__	40401		-4.85633	0.078607	0.247051	0.000397776	0
p__Proteobacteria	c__Gammaproteobacteria	o__Pasteurellales	f__Pasteurellaceae	g__Actinobacillus	s__parahaemolyticus	971907		-4.78293	0.00110989	0.0130227	0.000363978	8.28453e-05
p__Bacteroidetes	c__Bacteroidia	o__Bacteroidales	f__[Paraprevotellaceae]	g__[Prevotella]	s__	2469654		-4.67613	0.0698826	0.227765	0.00397265	5.29794e-06
p__Actinobacteria	c__Actinobacteria	o__Actinomycetales	f__Micrococcaceae	g__	s__	1081815		-4.53072	0.0299244	0.162655	0.00121646	0.000460686
p__Proteobacteria	c__Alphaproteobacteria	o__Rhodobacterales	f__Rhodobacteraceae	g__Rhodobacter	s__	746799		-4.48325	0.0132441	0.0960908	0.000616844	7.0375e-05
p__Proteobacteria	c__Betaproteobacteria	o__Burkholderiales	f__Burkholderiaceae	g__	s__	1105280		-4.41804	0.0565757	0.224325	0.000937809	0.000217532
p__Proteobacteria	c__Gammaproteobacteria	o__Pasteurellales	f__Pasteurellaceae	g__Haemophilus	s__parainfluenzae	865469		-4.40427	0.000176966	0.00389325	0.0163671	0.00357554
p__Actinobacteria	c__Actinobacteria	o__Actinomycetales	f__ACK-M1	g__	s__	242577		-4.40059	0.0314221	0.162655	0.00113471	1.29665e-05
p__Bacteroidetes	c__Bacteroidia	o__Bacteroidales	f__Porphyromonadaceae	g__Porphyromonas	s__endodontalis	1938		-4.13622	0.066918	0.225553	0.0011696	0.000490165
p__Actinobacteria	c__Actinobacteria	o__Actinomycetales	f__ACK-M1	g__	s__	830978		-3.88827	0.0594757	0.224325	0.000704355	1.0335e-05
p__Proteobacteria	c__Gammaproteobacteria	o__Pasteurellales	f__Pasteurellaceae	g__	s__	1086274		-2.51348	0.054883	0.224325	0.000275175	3.97023e-05
p__Proteobacteria	c__Betaproteobacteria	o__Burkholderiales	f__Comamonadaceae	g__Methylibium	s__	1108726		-2.45632	0.0292967	0.162655	0.00122389	0.00068655
p__Actinobacteria	c__Actinobacteria	o__Actinomycetales	f__Microbacteriaceae	g__Candidatus	s__	810672		-2.08401	0.0303808	0.162655	0.00378998	0.000325683
p__Proteobacteria	c__Betaproteobacteria	o__Burkholderiales	f__Oxalobacteraceae	g__	s__	814363		-2.05415	0.0396612	0.184501	0.000415726	0.000516307
OTU enriched in < 6 Months Survival
p__Firmicutes	c__Bacilli	o__Lactobacillales	f__Streptococcaceae	g__Streptococcus	s__	1078207		1.54495	0.0633698	0.224325	0.000312196	0.000552151
p__Firmicutes	c__Clostridia	o__Clostridiales	f__Veillonellaceae	g__Veillonella	s__dispar	757622		1.74409	0.0631271	0.224325	0.000290627	0.000577547
p__Firmicutes	c__Clostridia	o__Clostridiales	f__Veillonellaceae	g__Veillonella	s__dispar	4388775		1.79508	0.0491198	0.215177	0.000216306	0.000411739
p__Firmicutes	c__Clostridia	o__Clostridiales	f__Veillonellaceae	g__Veillonella	s__	585419		1.85335	0.0649915	0.224325	0.0512435	0.13079
p__Firmicutes	c__Clostridia	o__Clostridiales	f__Veillonellaceae	g__Veillonella	s__dispar	4340138		1.98727	0.0371621	0.181681	0.0002923	0.000847779
p__Firmicutes	c__Clostridia	o__Clostridiales	f__Veillonellaceae	g__Veillonella	s__dispar	342427		2.43668	0.0234929	0.14767	0.0056757	0.0199888
p__Bacteroidetes	c__Bacteroidia	o__Bacteroidales	f__Prevotellaceae	g__Prevotella	s__melaninogenica	4306852		2.4817	0.0565582	0.224325	0.000148179	0.000480628
p__Bacteroidetes	c__Bacteroidia	o__Bacteroidales	f__Prevotellaceae	g__Prevotella	s__melaninogenica	535359		3.30132	0.0149344	0.101094	0.000458893	0.00215118
p__Actinobacteria	c__Coriobacteriia	o__Coriobacteriales	f__Coriobacteriaceae	g__Atopobium	s__	4451251		3.63677	0.0650033	0.224325	0.00159492	0.00673966
p__Proteobacteria	c__Gammaproteobacteria	o__Pseudomonadales	f__Moraxellaceae	g__Moraxella	s__	1083037		3.84962	0.0738761	0.236403	0.000415972	0.0023485
p__Firmicutes	c__Bacilli	o__Lactobacillales	f__Streptococcaceae	g__Streptococcus	s__	989579		3.91631	0.000219777	0.00429787	0.000100855	0.000878649
p__Firmicutes	c__Bacilli	o__Lactobacillales	f__Streptococcaceae	g__Streptococcus	s__	968954		4.00275	0.000520257	0.00744149	0.00636251	0.0590666
p__Bacteroidetes	c__Bacteroidia	o__Bacteroidales	f__Prevotellaceae	g__Prevotella	s__melaninogenica	935742		4.07153	0.002601	0.026928	0.0200183	0.149468
p__Proteobacteria	c__Betaproteobacteria	o__Rhodocyclales	f__Rhodocyclaceae	g__	s__	815406		4.38624	0.0679224	0.225553	0.000107959	0.00144216
p__Firmicutes	c__Clostridia	o__Clostridiales	f__Veillonellaceae	g__Veillonella	s__parvula	3889756		5.18166	0.000405761	0.00649217	6.39381e-05	0.00177587
p__Firmicutes	c__Bacilli	o__Gemellales	f__Gemellaceae	g__	s__	1065569		6.111	0.0243524	0.147794	8.27288e-05	0.00208594
p__Proteobacteria	c__Betaproteobacteria	o__Neisseriales	f__Neisseriaceae	g__Neisseria	s__cinerea	470724		7.77101	6.70548e-06	0.000196694	3.54696e-05	0.00243801
p__Actinobacteria	c__Actinobacteria	o__Bifidobacteriales	f__Bifidobacteriaceae	g__Alloscardovia	s__	1136387		9.78863	0.00430282	0.0398577	2.29311e-05	0.00744005

## Sheet: Table 3 16s 6 month IIIB-IV
Phylum	Class	Order	Family	Genus	Specie	OTU#		logFC	pvalue	adj.P.Val	abundance.Alive.advsix	abundance.Dead.advsix
OTU enriched in > 6 Months Survival
p__Actinobacteria	c__Actinobacteria	o__Actinomycetales	f__Corynebacteriaceae	g__Corynebacterium	s__	1069816		-24.6233	1.0273e-41	4.05784e-39	0.00618279	4.12457e-05
p__Bacteroidetes	c__Bacteroidia	o__Bacteroidales	f__Prevotellaceae	g__Prevotella	s__	239506		-24.3387	5.94404e-35	1.17395e-32	0.00108293	0.000771765
p__Firmicutes	c__Bacilli	o__Lactobacillales	f__Aerococcaceae	g__Alloiococcus	s__	1075821		-23.9256	1.67035e-20	2.19929e-18	0.00592899	0.000199594
p__Bacteroidetes	c__Bacteroidia	o__Bacteroidales	f__Prevotellaceae	g__Prevotella	s__	1060441		-8.43439	1.30063e-05	0.00085625	0.00137495	0.000377869
p__Bacteroidetes	c__Bacteroidia	o__Bacteroidales	f__[Paraprevotellaceae]	g__[Prevotella]	s__	1008348		-8.34735	0.000158205	0.00494513	0.000922389	1.83473e-06
p__Fusobacteria	c__Fusobacteriia	o__Fusobacteriales	f__Leptotrichiaceae	g__Leptotrichia	s__	4306055		-7.75466	8.36666e-10	8.26207e-08	0.0019301	4.7645e-06
p__Proteobacteria	c__Gammaproteobacteria	o__Pasteurellales	f__Pasteurellaceae	g__Aggregatibacter	s__	862115		-5.48117	0.000606359	0.0126059	0.000896671	5.76986e-05
p__Bacteroidetes	c__Bacteroidia	o__Bacteroidales	f__[Paraprevotellaceae]	g__[Prevotella]	s__	269907		-5.38138	0.00113831	0.0187348	0.00736545	0.000320772
p__Bacteroidetes	c__Bacteroidia	o__Bacteroidales	f__Porphyromonadaceae	g__Porphyromonas	s__	4465803		-5.19824	0.00752483	0.0652241	0.000259795	0
p__Proteobacteria	c__Alphaproteobacteria	o__Rhizobiales	f__Rhizobiaceae	g__Agrobacterium	s__	969805		-5.09063	0.0558001	0.207934	0.000502624	4.71685e-05
p__Proteobacteria	c__Gammaproteobacteria	o__Enterobacteriales	f__Enterobacteriaceae	g__Morganella	s__morganii	233981		-4.94454	0.0261769	0.147712	0.000363954	0.000155039
p__Proteobacteria	c__Betaproteobacteria	o__Neisseriales	f__Neisseriaceae	g__	s__	933546		-4.89772	2.98815e-05	0.0014754	0.0024164	0.000401395
p__Bacteroidetes	c__Bacteroidia	o__Bacteroidales	f__Prevotellaceae	g__Prevotella	s__	557665		-4.82806	0.0195035	0.124256	0.000214122	0
p__Bacteroidetes	c__[Saprospirae]	o__[Saprospirales]	f__	g__	s__	819699		-4.79048	0.00527023	0.0495653	0.000632721	2.84693e-07
p__Bacteroidetes	c__Bacteroidia	o__Bacteroidales	f__[Paraprevotellaceae]	g__[Prevotella]	s__	1076413		-4.76974	0.00194753	0.0274741	0.00013309	1.83473e-06
p__Bacteroidetes	c__Cytophagia	o__Cytophagales	f__Cytophagaceae	g__Leadbetterella	s__	913174		-4.73929	0.0159852	0.108865	0.000729582	1.3129e-06
p__Firmicutes	c__Clostridia	o__Clostridiales	f__	g__	s__	4432435		-4.58429	0.00985923	0.0763607	0.000652315	3.47761e-05
p__Cyanobacteria	c__Chloroplast	o__Streptophyta	f__	g__	s__	1787644		-4.56187	0.0205615	0.128917	0.00357211	0.00370916
p__Proteobacteria	c__Betaproteobacteria	o__Neisseriales	f__Neisseriaceae	g__	s__	3393186		-4.45235	0.000464679	0.0101971	0.000290289	2.37805e-05
p__Bacteroidetes	c__Bacteroidia	o__Bacteroidales	f__Porphyromonadaceae	g__Paludibacter	s__	4305935		-4.37998	0.0286449	0.153328	0.000157084	0.000231873
p__Verrucomicrobia	c__Verrucomicrobiae	o__Verrucomicrobiales	f__Verrucomicrobiaceae	g__Luteolibacter	s__	145278		-4.2434	0.00282633	0.0348875	0.000285036	5.88229e-06
p__Proteobacteria	c__Epsilonproteobacteria	o__Campylobacterales	f__Campylobacteraceae	g__Campylobacter	s__rectus	430191		-4.14171	0.00789245	0.0663301	0.00152083	9.74758e-05
p__Proteobacteria	c__Gammaproteobacteria	o__Pseudomonadales	f__Pseudomonadaceae	g__Pseudomonas	s__	544313		-3.95083	0.0519997	0.199416	0.000439895	0.000107745
p__Tenericutes	c__Mollicutes	o__Mycoplasmatales	f__Mycoplasmataceae	g__Mycoplasma	s__	573950		-3.83102	0.0372955	0.179655	0.00060234	9.74632e-06
p__Verrucomicrobia	c__Verrucomicrobiae	o__Verrucomicrobiales	f__Verrucomicrobiaceae	g__Verrucomicrobium	s__	35291		-3.78166	0.0436072	0.193774	0.000478599	1.13877e-06
p__Planctomycetes	c__Planctomycetia	o__Planctomycetales	f__Planctomycetaceae	g__Planctomyces	s__	385507		-3.74483	0.0672294	0.23924	0.000432922	8.64895e-05
p__Bacteroidetes	c__Bacteroidia	o__Bacteroidales	f__Porphyromonadaceae	g__Tannerella	s__	165107		-3.67501	0.0283061	0.153328	0.000227554	0.000115645
p__Bacteroidetes	c__Bacteroidia	o__Bacteroidales	f__[Paraprevotellaceae]	g__[Prevotella]	s__	872158		-3.48926	0.0189693	0.122834	6.03761e-05	1.83473e-06
p__Tenericutes	c__Mollicutes	o__Mycoplasmatales	f__Mycoplasmataceae	g__Mycoplasma	s__	594001		-3.44756	0.034806	0.176261	0.000132668	1.35528e-05
p__Bacteroidetes	c__Sphingobacteriia	o__Sphingobacteriales	f__	g__	s__	40351		-3.31889	0.033999	0.174411	0.000941832	0.00018115
p__Firmicutes	c__Clostridia	o__Clostridiales	f__[Tissierellaceae]	g__Parvimonas	s__	1866742		-3.29167	0.0452959	0.194835	0.000980755	0.000566325
p__Bacteroidetes	c__Flavobacteriia	o__Flavobacteriales	f__Flavobacteriaceae	g__Capnocytophaga	s__ochracea	4295289		-3.28336	0.00339084	0.0379333	0.000115968	1.68627e-05
p__Bacteroidetes	c__Bacteroidia	o__Bacteroidales	f__[Paraprevotellaceae]	g__[Prevotella]	s__tannerae	4334651		-3.13634	0.00406711	0.0411926	0.000409382	1.1475e-05
p__Firmicutes	c__Clostridia	o__Clostridiales	f__	g__	s__	4329788		-3.11012	0.0564638	0.208441	0.000462344	5.22722e-05
p__Bacteroidetes	c__Bacteroidia	o__Bacteroidales	f__Porphyromonadaceae	g__Tannerella	s__	4406621		-3.09798	0.0420143	0.190754	0.000638886	8.49352e-05
p__Cyanobacteria	c__Chloroplast	o__Streptophyta	f__	g__	s__	769222		-3.08236	0.00130222	0.0205751	0.00686434	0.00115581
p__Firmicutes	c__Clostridia	o__Clostridiales	f__Clostridiaceae	g__	s__	527630		-3.07111	0.0232356	0.140254	0.000567522	0.000307486
p__Firmicutes	c__Clostridia	o__Clostridiales	f__Veillonellaceae	g__Veillonella	s__	561537		-3.03118	0.00677039	0.0607796	0.00678467	0.000764831
p__Cyanobacteria	c__Chloroplast	o__Streptophyta	f__	g__	s__	153978		-2.95685	0.0465728	0.194835	0.00912892	5.72161e-05
p__Bacteroidetes	c__Bacteroidia	o__Bacteroidales	f__[Paraprevotellaceae]	g__[Prevotella]	s__	93000		-2.85161	0.00759572	0.0652241	0.00153836	0.000453184
p__Proteobacteria	c__Betaproteobacteria	o__Burkholderiales	f__Comamonadaceae	g__Ramlibacter	s__	937372		-2.83335	0.00611499	0.0561726	0.000582942	0.000637225
p__Bacteroidetes	c__Flavobacteriia	o__Flavobacteriales	f__[Weeksellaceae]	g__	s__	4298633		-2.80178	0.0256628	0.14691	0.000589781	8.97406e-05
p__Bacteroidetes	c__Bacteroidia	o__Bacteroidales	f__Prevotellaceae	g__Prevotella	s__pallens	2222		-2.78684	0.00326665	0.0379333	0.000303795	0.000199692
p__Fusobacteria	c__Fusobacteriia	o__Fusobacteriales	f__Leptotrichiaceae	g__Leptotrichia	s__	4307303		-2.72691	0.0386845	0.181909	0.000184827	1.01391e-05
p__Cyanobacteria	c__Chloroplast	o__Streptophyta	f__	g__	s__	2307137		-2.64087	0.0402255	0.184756	0.000221898	1.71016e-05
p__Bacteroidetes	c__Flavobacteriia	o__Flavobacteriales	f__Flavobacteriaceae	g__Capnocytophaga	s__ochracea	987790		-2.62435	0.0252925	0.14691	0.00404457	0.00107834
p__Bacteroidetes	c__Bacteroidia	o__Bacteroidales	f__Prevotellaceae	g__Prevotella	s__	515747		-2.62203	0.0287248	0.153328	0.00797134	0.00145857
p__Bacteroidetes	c__Flavobacteriia	o__Flavobacteriales	f__Cryomorphaceae	g__Fluviicola	s__	325694		-2.59851	0.0123142	0.0900762	0.000377138	0.000294373
p__Proteobacteria	c__Betaproteobacteria	o__Neisseriales	f__Neisseriaceae	g__	s__	761024		-2.57906	0.0656244	0.235651	0.000196867	0.000189274
p__Bacteroidetes	c__Bacteroidia	o__Bacteroidales	f__Prevotellaceae	g__Prevotella	s__pallens	705241		-2.55094	0.0234348	0.140254	0.0171944	0.00846345
p__Bacteroidetes	c__Sphingobacteriia	o__Sphingobacteriales	f__	g__	s__	245345		-2.5159	0.0489691	0.194835	0.000480309	0.000475317
p__Proteobacteria	c__Gammaproteobacteria	o__Pasteurellales	f__Pasteurellaceae	g__Actinobacillus	s__parahaemolyticus	893979		-2.29832	0.0400571	0.184756	0.00545791	0.00133939
p__Proteobacteria	c__Betaproteobacteria	o__Burkholderiales	f__Comamonadaceae	g__	s__	225259		-2.28155	0.0541055	0.205497	0.000250164	0.000381598
p__Fusobacteria	c__Fusobacteriia	o__Fusobacteriales	f__Fusobacteriaceae	g__Fusobacterium	s__	4323555		-2.22428	0.00355325	0.0379333	8.66851e-05	2.42547e-05
p__Fusobacteria	c__Fusobacteriia	o__Fusobacteriales	f__Fusobacteriaceae	g__Fusobacterium	s__	4419553		-2.21292	0.001123	0.0187348	7.59615e-05	2.01136e-05
p__Fusobacteria	c__Fusobacteriia	o__Fusobacteriales	f__Fusobacteriaceae	g__Fusobacterium	s__	444857		-2.14517	0.0174941	0.11517	5.65226e-05	0.000112938
p__Proteobacteria	c__Betaproteobacteria	o__Burkholderiales	f__Comamonadaceae	g__Variovorax	s__paradoxus	1048878		-2.13511	0.0142979	0.0990817	0.000383456	0.000307549
p__Proteobacteria	c__Gammaproteobacteria	o__Pasteurellales	f__Pasteurellaceae	g__Haemophilus	s__influenzae	240755		-2.08886	0.00469212	0.0452046	0.000119511	4.74874e-05
p__Fusobacteria	c__Fusobacteriia	o__Fusobacteriales	f__Leptotrichiaceae	g__Leptotrichia	s__	324532		-2.0611	0.0296629	0.156224	0.000125314	2.03499e-05
p__Proteobacteria	c__Betaproteobacteria	o__Neisseriales	f__Neisseriaceae	g__Neisseria	s__	4326647		-1.91027	0.0382799	0.181909	0.000127581	4.86188e-05
p__Firmicutes	c__Clostridia	o__Clostridiales	f__Veillonellaceae	g__Veillonella	s__parvula	3889756		-1.90857	0.0360099	0.178473	0.000413489	2.94366e-05
p__Bacteroidetes	c__Flavobacteriia	o__Flavobacteriales	f__Flavobacteriaceae	g__Flavobacterium	s__	461206		-1.84125	0.00460304	0.0452046	0.000369356	0.000527958
p__Proteobacteria	c__Betaproteobacteria	o__Neisseriales	f__Neisseriaceae	g__Neisseria	s__	4314749		-1.75704	0.033057	0.171809	9.13007e-05	3.97164e-05
p__Proteobacteria	c__Gammaproteobacteria	o__Pasteurellales	f__Pasteurellaceae	g__Actinobacillus	s__parahaemolyticus	971907		-1.70134	0.0242574	0.14301	0.000663123	0.000267748
p__Bacteroidetes	c__Cytophagia	o__Cytophagales	f__Cytophagaceae	g__	s__	304640		-1.6188	0.0139699	0.0985378	0.00243286	0.00151177
p__Proteobacteria	c__Betaproteobacteria	o__Burkholderiales	f__Comamonadaceae	g__Aquincola	s__tertiaricarbonis	940737		-1.6085	0.0436605	0.193774	0.000816084	0.000890939
p__Proteobacteria	c__Epsilonproteobacteria	o__Campylobacterales	f__Campylobacteraceae	g__Campylobacter	s__	833609		-1.5898	0.0492107	0.194835	7.5531e-05	1.77455e-05
p__Fusobacteria	c__Fusobacteriia	o__Fusobacteriales	f__Fusobacteriaceae	g__Fusobacterium	s__	545299		-1.53423	0.0510708	0.199416	0.000408563	0.000528258
p__Proteobacteria	c__Gammaproteobacteria	o__Pasteurellales	f__Pasteurellaceae	g__Haemophilus	s__	4305793		-1.53387	0.0361465	0.178473	0.000133589	6.43952e-05
p__Proteobacteria	c__Gammaproteobacteria	o__Pasteurellales	f__Pasteurellaceae	g__Actinobacillus	s__	359779		-1.49754	0.0480645	0.194835	9.6689e-05	3.66725e-05
p__Fusobacteria	c__Fusobacteriia	o__Fusobacteriales	f__Fusobacteriaceae	g__Fusobacterium	s__	938948		-1.4641	0.0552039	0.207672	0.0272781	0.0106706
p__Proteobacteria	c__Gammaproteobacteria	o__Pasteurellales	f__Pasteurellaceae	g__Haemophilus	s__	153997		-1.44222	0.0611791	0.223757	0.000133158	6.83762e-05
p__Proteobacteria	c__Gammaproteobacteria	o__Pasteurellales	f__Pasteurellaceae	g__Haemophilus	s__parainfluenzae	865469		-1.40224	0.0478082	0.194835	0.0397447	0.0197515
p__Proteobacteria	c__Gammaproteobacteria	o__Pasteurellales	f__Pasteurellaceae	g__Haemophilus	s__parainfluenzae	4300778		-1.35504	0.0493253	0.194835	0.000119343	6.54713e-05
OTU enriched in < 6 Months Survival
p__Firmicutes	c__Clostridia	o__Clostridiales	f__Veillonellaceae	g__Veillonella	s__dispar	4318671		1.17739	0.0464753	0.194835	0.000165077	0.000414407
p__Firmicutes	c__Bacilli	o__Lactobacillales	f__Streptococcaceae	g__Streptococcus	s__	4325275		1.32591	0.0267833	0.149005	4.94929e-05	0.000132506
p__Firmicutes	c__Bacilli	o__Lactobacillales	f__Streptococcaceae	g__Streptococcus	s__	863124		1.36525	0.00872142	0.07177	6.74699e-05	0.000186916
p__Firmicutes	c__Bacilli	o__Lactobacillales	f__Streptococcaceae	g__Streptococcus	s__	4445466		1.41824	0.00376024	0.0390867	5.49165e-05	0.000152042
p__Firmicutes	c__Bacilli	o__Lactobacillales	f__Lactobacillaceae	g__Lactobacillus	s__	586458		1.42159	0.00949875	0.0750401	0.000119448	0.000438596
p__Firmicutes	c__Bacilli	o__Lactobacillales	f__Streptococcaceae	g__Streptococcus	s__	593803		1.4731	0.0231764	0.140254	4.63839e-05	0.000121694
p__Firmicutes	c__Bacilli	o__Lactobacillales	f__Streptococcaceae	g__Streptococcus	s__	4301566		1.56146	0.00157206	0.0238832	0.000139687	0.000471092
p__Firmicutes	c__Bacilli	o__Lactobacillales	f__Streptococcaceae	g__Streptococcus	s__	1083194		1.59	0.00103511	0.018585	0.0260533	0.0907045
p__Firmicutes	c__Bacilli	o__Lactobacillales	f__Carnobacteriaceae	g__Granulicatella	s__	993647		1.5905	0.00281919	0.0348875	4.33153e-05	0.000160229
p__Firmicutes	c__Bacilli	o__Lactobacillales	f__Streptococcaceae	g__Streptococcus	s__	584109		1.60147	0.0467843	0.194835	2.88488e-05	0.000122606
p__Firmicutes	c__Bacilli	o__Lactobacillales	f__Streptococcaceae	g__Streptococcus	s__	4309301		1.63096	0.00185341	0.0271146	8.04394e-05	0.000288874
p__Firmicutes	c__Bacilli	o__Lactobacillales	f__Streptococcaceae	g__Streptococcus	s__	4332717		1.71375	0.00243916	0.0321156	9.83617e-05	0.000397133
p__Bacteroidetes	c__Flavobacteriia	o__Flavobacteriales	f__[Weeksellaceae]	g__Chryseobacterium	s__	813781		1.73783	0.0691137	0.243749	0.00158079	0.00247038
p__Firmicutes	c__Bacilli	o__Lactobacillales	f__Streptococcaceae	g__Streptococcus	s__	4303294		1.74628	0.00227655	0.0310081	7.83757e-05	0.000254785
p__Firmicutes	c__Bacilli	o__Lactobacillales	f__Streptococcaceae	g__Streptococcus	s__	529233		1.74708	0.00095357	0.0179362	6.18312e-05	0.000239424
p__Firmicutes	c__Bacilli	o__Lactobacillales	f__Streptococcaceae	g__Streptococcus	s__	1078207		1.8006	9.08333e-05	0.00358791	0.000170633	0.000644723
p__Firmicutes	c__Bacilli	o__Lactobacillales	f__Streptococcaceae	g__Streptococcus	s__	1082539		1.80789	0.00323101	0.0379333	0.00054877	0.00164737
p__Actinobacteria	c__Actinobacteria	o__Actinomycetales	f__Micrococcaceae	g__Rothia	s__mucilaginosa	4294457		1.85268	0.0369327	0.179655	2.45655e-05	9.48815e-05
p__Firmicutes	c__Bacilli	o__Lactobacillales	f__Streptococcaceae	g__Streptococcus	s__	59566		1.9099	5.09167e-05	0.00223468	3.00189e-05	0.000140492
p__Firmicutes	c__Bacilli	o__Lactobacillales	f__Streptococcaceae	g__Streptococcus	s__infantis	996434		1.94776	0.000100521	0.00360961	6.97887e-05	0.00029327
p__Firmicutes	c__Bacilli	o__Lactobacillales	f__Streptococcaceae	g__Streptococcus	s__	966820		2.06392	0.00027523	0.00724772	2.76494e-05	0.000136782
p__Firmicutes	c__Bacilli	o__Lactobacillales	f__Streptococcaceae	g__Streptococcus	s__	4317631		2.1562	0.000162751	0.00494513	3.17046e-05	0.000158681
p__Firmicutes	c__Bacilli	o__Lactobacillales	f__Streptococcaceae	g__Streptococcus	s__	931950		2.18042	0.000763997	0.0150889	2.57574e-05	0.000139345
p__Actinobacteria	c__Actinobacteria	o__Actinomycetales	f__Actinomycetaceae	g__Actinomyces	s__	510422		2.41445	0.0518413	0.199416	0.000701555	0.00277186
p__Firmicutes	c__Bacilli	o__Gemellales	f__Gemellaceae	g__	s__	925707		2.61197	0.0136747	0.0982091	3.17954e-05	0.000201847
p__Firmicutes	c__Bacilli	o__Bacillales	f__Staphylococcaceae	g__Staphylococcus	s__	1084865		2.79981	1.09232e-05	0.00085625	0.00796092	0.0218133
p__Bacteroidetes	c__Bacteroidia	o__Bacteroidales	f__Prevotellaceae	g__Prevotella	s__	530206		2.84915	0.00039296	0.00913053	0.0038518	0.0220855
p__Firmicutes	c__Clostridia	o__Clostridiales	f__Veillonellaceae	g__Veillonella	s__dispar	4422456		2.91677	0.00906907	0.0731078	0.000426822	0.000821642
p__Proteobacteria	c__Gammaproteobacteria	o__Enterobacteriales	f__Enterobacteriaceae	g__Enterobacter	s__arachidis	687940		3.04449	0.0477914	0.194835	0.000270967	0.00139217
p__Proteobacteria	c__Gammaproteobacteria	o__Pseudomonadales	f__Moraxellaceae	g__Acinetobacter	s__lwoffii	1097359		3.09502	0.0654274	0.235651	0.000494944	0.000999248
p__Actinobacteria	c__Actinobacteria	o__Actinomycetales	f__Microbacteriaceae	g__Salinibacterium	s__	876170		3.27738	0.0467313	0.194835	0.000547081	0.00114539
p__Actinobacteria	c__Actinobacteria	o__Actinomycetales	f__Corynebacteriaceae	g__Corynebacterium	s__	446403		3.35823	0.0120901	0.0900762	0.000553973	0.00470269
p__Firmicutes	c__Bacilli	o__Lactobacillales	f__Streptococcaceae	g__Streptococcus	s__	516611		3.72909	1.59613e-05	0.000900675	2.80403e-05	0.000392092
p__Proteobacteria	c__Alphaproteobacteria	o__Sphingomonadales	f__Sphingomonadaceae	g__	s__	820086		3.98422	0.0112839	0.0857145	0.000546935	0.00215269
p__Cyanobacteria	c__4C0d-2	o__YS2	f__	g__	s__	537033		4.31745	0.0170137	0.113905	3.75851e-05	0.000982335
p__Proteobacteria	c__Gammaproteobacteria	o__Pseudomonadales	f__Moraxellaceae	g__Acinetobacter	s__	889025		4.92653	0.000322445	0.00796037	0.000235537	0.00625269
p__Proteobacteria	c__Alphaproteobacteria	o__Rhizobiales	f__Methylobacteriaceae	g__Methylobacterium	s__adhaesivum	591699		5.05144	0.0034799	0.0379333	0.00126435	0.0243499
p__Proteobacteria	c__Gammaproteobacteria	o__Pseudomonadales	f__Moraxellaceae	g__Moraxella	s__	1083037		6.43869	0.000268927	0.00724772	0.000688837	0.0625792

## Sheet: Table 4 16s 1yr I-IIIA 
Phylum	Class	Order	Family	Genus	Specie	OTU#		logFC	pvalue	adj.P.Val	abundance.Alive.Localoneyr	abundance.Dead.Localoneyr
OTU enriched in > one year Survival
p__Actinobacteria	c__Actinobacteria	o__Actinomycetales	f__Actinomycetaceae	g__Actinomyces	s__	875735		-23.2819	4.96299e-22	1.13901e-19	0.000888424	0.00036342
p__Actinobacteria	c__Actinobacteria	o__Bifidobacteriales	f__Bifidobacteriaceae	g__Bifidobacterium	s__longum	559527		-22.9512	1.74158e-20	2.66462e-18	0.00101091	0.000140167
p__Firmicutes	c__Clostridia	o__Clostridiales	f__Lachnospiraceae	g__	s__	922397		-22.4961	4.66527e-24	2.14136e-21	0.000454019	0
p__Bacteroidetes	c__Bacteroidia	o__Bacteroidales	f__[Paraprevotellaceae]	g__[Prevotella]	s__	4310396		-9.75693	1.37237e-05	0.00157479	0.00496637	2.44278e-06
p__Bacteroidetes	c__Bacteroidia	o__Bacteroidales	f__Prevotellaceae	g__Prevotella	s__pallens	705241		-8.61923	3.13842e-05	0.00250229	0.00557652	1.13535e-05
p__Cyanobacteria	c__Chloroplast	o__Streptophyta	f__	g__	s__	769222		-6.14556	0.0059788	0.161428	0.00113253	0
p__Firmicutes	c__Bacilli	o__Lactobacillales	f__Carnobacteriaceae	g__Granulicatella	s__	1027587		-5.61011	0.000662563	0.0380146	0.0253337	0.000293997
p__Proteobacteria	c__Gammaproteobacteria	o__Pasteurellales	f__Pasteurellaceae	g__Actinobacillus	s__parahaemolyticus	893979		-5.44044	0.0011706	0.0447754	0.00304635	7.00222e-05
p__Proteobacteria	c__Alphaproteobacteria	o__Sphingomonadales	f__Sphingomonadaceae	g__Sphingomonas	s__	1108960		-4.82169	0.00341726	0.0980326	0.0015408	0.000201606
p__Proteobacteria	c__Gammaproteobacteria	o__Pasteurellales	f__Pasteurellaceae	g__Haemophilus	s__parainfluenzae	865469		-4.65926	3.27096e-05	0.00250229	0.0173866	0.00321798
p__Fusobacteria	c__Fusobacteriia	o__Fusobacteriales	f__Fusobacteriaceae	g__Fusobacterium	s__	938948		-4.61042	0.0020533	0.0724972	0.00761528	0.00240855
p__Proteobacteria	c__Gammaproteobacteria	o__Pasteurellales	f__Pasteurellaceae	g__Haemophilus	s__	341460		-3.70868	0.00819893	0.209073	0.000172635	6.98885e-06
OTU enriched in < one year Survival
p__Firmicutes	c__Bacilli	o__Lactobacillales	f__Streptococcaceae	g__Streptococcus	s__	989579		3.604	0.00111902	0.0447754	0.000114039	0.000790784
p__Firmicutes	c__Bacilli	o__Lactobacillales	f__Streptococcaceae	g__Streptococcus	s__	968954		3.72619	0.000958084	0.0442534	0.00683336	0.0532126
p__Bacteroidetes	c__Bacteroidia	o__Bacteroidales	f__Prevotellaceae	g__Prevotella	s__melaninogenica	935742		3.92603	0.00341355	0.0980326	0.0197247	0.134522
p__Firmicutes	c__Clostridia	o__Clostridiales	f__Veillonellaceae	g__Veillonella	s__parvula	3889756		4.76899	0.000964125	0.0442534	7.41698e-05	0.00159828
p__Proteobacteria	c__Betaproteobacteria	o__Neisseriales	f__Neisseriaceae	g__Neisseria	s__cinerea	470724		7.60569	9.01639e-05	0.00591217	3.89776e-05	0.00219421
p__Actinobacteria	c__Actinobacteria	o__Bifidobacteriales	f__Bifidobacteriaceae	g__Alloscardovia	s__	1136387		9.36593	0.00240248	0.0787669	2.90461e-05	0.00669604

## Sheet: Table 5 16s 1yr IIIB-IV
Phylum	Class	Order	Family	Genus	Specie	OTU#		logFC	pvalue	adj.P.Val	abundance.Alive.advoneyr	abundance.Dead.advoneyr
OTU enriched in > one year Survival
p__Firmicutes	c__Bacilli	o__Lactobacillales	f__Aerococcaceae	g__Alloiococcus	s__	1075821		-27.7925	2.58049e-41	1.30315e-38	0.0104247	0.000146045
p__Fusobacteria	c__Fusobacteriia	o__Fusobacteriales	f__Leptotrichiaceae	g__	s__	876114		-25.3942	6.76878e-18	6.83646e-16	0.000912055	0
p__Bacteroidetes	c__Bacteroidia	o__Bacteroidales	f__[Paraprevotellaceae]	g__[Prevotella]	s__	1008348		-9.15061	1.17349e-06	9.87687e-05	0.00141881	0.000145154
p__Actinobacteria	c__Actinobacteria	o__Actinomycetales	f__Corynebacteriaceae	g__Corynebacterium	s__	1069816		-7.32165	1.34543e-05	0.000849301	0.0108288	3.01798e-05
p__Bacteroidetes	c__Bacteroidia	o__Bacteroidales	f__Prevotellaceae	g__Prevotella	s__nanceiensis	1052181		-7.02234	0.0169267	0.194273	0.00233681	1.65695e-05
p__Bacteroidetes	c__Flavobacteriia	o__Flavobacteriales	f__Flavobacteriaceae	g__Capnocytophaga	s__	530224		-5.43637	0.0194113	0.208569	0.000213582	0
p__Verrucomicrobia	c__Verrucomicrobiae	o__Verrucomicrobiales	f__Verrucomicrobiaceae	g__Luteolibacter	s__	145278		-4.34719	0.000652577	0.0274626	0.000490902	1.16375e-05
p__Firmicutes	c__Clostridia	o__Clostridiales	f__Veillonellaceae	g__Veillonella	s__parvula	3889756		-4.13084	0.000174321	0.00800293	0.000758051	0.000202419
p__Armatimonadetes	c__Armatimonadia	o__Armatimonadales	f__Armatimonadaceae	g__Armatimonas	s__	141815		-3.97804	0.0215887	0.215613	0.000289524	1.68452e-06
p__Proteobacteria	c__Gammaproteobacteria	o__Pseudomonadales	f__Pseudomonadaceae	g__Pseudomonas	s__	646549		-3.71934	5.56454e-05	0.00281009	0.0444359	0.00521634
p__Bacteroidetes	c__Bacteroidia	o__Bacteroidales	f__[Paraprevotellaceae]	g__[Prevotella]	s__	1076413		-3.64198	0.0199587	0.209982	0.000209077	1.82443e-05
p__Proteobacteria	c__Gammaproteobacteria	o__Pseudomonadales	f__Pseudomonadaceae	g__Pseudomonas	s__	974121		-3.26166	0.0047043	0.0989863	0.000957213	0.000890373
p__Bacteroidetes	c__Bacteroidia	o__Bacteroidales	f__[Paraprevotellaceae]	g__[Prevotella]	s__tannerae	4334651		-3.21637	0.00731775	0.12743	0.000682747	9.81709e-06
p__Bacteroidetes	c__Flavobacteriia	o__Flavobacteriales	f__Flavobacteriaceae	g__Capnocytophaga	s__ochracea	4295289		-3.0531	0.00863125	0.144326	8.42946e-05	1.41797e-05
p__Proteobacteria	c__Betaproteobacteria	o__Neisseriales	f__Neisseriaceae	g__	s__	942534		-2.90831	0.0212344	0.215613	0.000289892	2.88708e-05
p__Proteobacteria	c__Betaproteobacteria	o__Neisseriales	f__Neisseriaceae	g__Neisseria	s__subflava	1007399		-2.78569	0.00726377	0.12743	6.76272e-05	1.38143e-05
p__OD1	c__ZB2	o__	f__	g__	s__	4315529		-2.65071	0.0270983	0.244369	0.000152203	0.000156818
p__Bacteroidetes	c__Flavobacteriia	o__Flavobacteriales	f__Cryomorphaceae	g__Fluviicola	s__	325694		-2.51324	0.0110355	0.15062	0.000508486	0.000248388
p__Proteobacteria	c__Betaproteobacteria	o__Neisseriales	f__Neisseriaceae	g__Neisseria	s__	4326647		-2.32454	0.0135961	0.17165	0.000181935	5.3054e-05
p__Proteobacteria	c__Gammaproteobacteria	o__Pasteurellales	f__Pasteurellaceae	g__Haemophilus	s__influenzae	240755		-1.98831	0.00623087	0.125864	0.000151393	4.95447e-05
p__Proteobacteria	c__Betaproteobacteria	o__Neisseriales	f__Neisseriaceae	g__Neisseria	s__	4314749		-1.89764	0.0192892	0.208569	0.000117552	5.41925e-05
OTU enriched in < one year Survival
p__Firmicutes	c__Bacilli	o__Lactobacillales	f__Streptococcaceae	g__Streptococcus	s__	4309301		1.26183	0.0249935	0.238146	9.37952e-05	0.000228888
p__Firmicutes	c__Bacilli	o__Lactobacillales	f__Streptococcaceae	g__Streptococcus	s__	1078207		1.26954	0.0126673	0.168341	0.000208412	0.000507784
p__Firmicutes	c__Bacilli	o__Lactobacillales	f__Streptococcaceae	g__Streptococcus	s__	1083194		1.2809	0.0130266	0.168677	0.0270518	0.0739038
p__Firmicutes	c__Bacilli	o__Lactobacillales	f__Lactobacillaceae	g__Lactobacillus	s__	586458		1.33301	0.0162404	0.194273	0.000116559	0.000364836
p__Firmicutes	c__Bacilli	o__Lactobacillales	f__Streptococcaceae	g__Streptococcus	s__	966820		1.39254	0.0288371	0.255486	3.47884e-05	0.000105033
p__Firmicutes	c__Bacilli	o__Lactobacillales	f__Streptococcaceae	g__Streptococcus	s__	4332717		1.42485	0.0259428	0.239756	0.000105177	0.000315737
p__Firmicutes	c__Bacilli	o__Lactobacillales	f__Streptococcaceae	g__Streptococcus	s__	4303294		1.42631	0.0166942	0.194273	8.67641e-05	0.000212929
p__Firmicutes	c__Bacilli	o__Lactobacillales	f__Streptococcaceae	g__Streptococcus	s__	4325275		1.48297	0.0149637	0.184309	3.38104e-05	0.000111416
p__Firmicutes	c__Bacilli	o__Lactobacillales	f__Streptococcaceae	g__Streptococcus	s__	529233		1.48693	0.0105435	0.149532	6.24969e-05	0.000193177
p__Firmicutes	c__Bacilli	o__Lactobacillales	f__Streptococcaceae	g__Streptococcus	s__	59566		1.49132	0.00696684	0.12743	3.48283e-05	0.000108667
p__Firmicutes	c__Bacilli	o__Lactobacillales	f__Streptococcaceae	g__Streptococcus	s__	4301566		1.58923	0.00195172	0.0616012	0.000120064	0.000399822
p__Firmicutes	c__Bacilli	o__Lactobacillales	f__Streptococcaceae	g__Streptococcus	s__infantis	996434		1.61565	0.00290265	0.0771495	7.62905e-05	0.000234335
p__Firmicutes	c__Bacilli	o__Lactobacillales	f__Streptococcaceae	g__Streptococcus	s__	1040009		1.77259	0.00672826	0.12743	2.27114e-05	9.15493e-05
p__Firmicutes	c__Bacilli	o__Lactobacillales	f__Streptococcaceae	g__Streptococcus	s__	4317631		1.8031	0.00370664	0.0850843	3.06644e-05	0.000132374
p__Firmicutes	c__Bacilli	o__Lactobacillales	f__Carnobacteriaceae	g__Granulicatella	s__	1027587		2.20617	0.00885961	0.144326	0.000729542	0.0132656
p__Actinobacteria	c__Actinobacteria	o__Actinomycetales	f__Micrococcaceae	g__Rothia	s__mucilaginosa	4294457		2.34308	0.00986338	0.149532	1.1156e-05	7.62342e-05
p__Proteobacteria	c__Betaproteobacteria	o__Neisseriales	f__Neisseriaceae	g__	s__	761024		3.03295	0.0261121	0.239756	9.15255e-05	0.00027561
p__Bacteroidetes	c__Bacteroidia	o__Bacteroidales	f__Prevotellaceae	g__Prevotella	s__	1004910		3.20977	0.00364104	0.0850843	0.00098699	0.00231642
p__Firmicutes	c__Bacilli	o__Bacillales	f__Staphylococcaceae	g__Staphylococcus	s__	925494		3.50046	0.00320706	0.0809782	4.62886e-06	6.1405e-05
p__Bacteroidetes	c__Bacteroidia	o__Bacteroidales	f__Prevotellaceae	g__Prevotella	s__	530206		3.65439	2.68996e-05	0.00150937	0.00186125	0.0189293
p__Fusobacteria	c__Fusobacteriia	o__Fusobacteriales	f__Leptotrichiaceae	g__Leptotrichia	s__	904227		3.70295	0.0188244	0.208569	5.266e-06	0.000200366
p__Actinobacteria	c__Actinobacteria	o__Actinomycetales	f__Corynebacteriaceae	g__Corynebacterium	s__	446403		3.79848	0.00919499	0.145108	0.000254746	0.00361207
p__Proteobacteria	c__Gammaproteobacteria	o__Enterobacteriales	f__Enterobacteriaceae	g__Enterobacter	s__arachidis	687940		3.957	0.0101167	0.149532	0.000348569	0.00107934
p__Bacteroidetes	c__Bacteroidia	o__Bacteroidales	f__Prevotellaceae	g__Prevotella	s__	851961		4.26667	0.00455976	0.0989863	8.45907e-05	0.00184988
p__Proteobacteria	c__Gammaproteobacteria	o__Pseudomonadales	f__Moraxellaceae	g__Moraxella	s__	1083037		4.57592	0.0236553	0.22973	0.00108711	0.0458431
p__Actinobacteria	c__Actinobacteria	o__Actinomycetales	f__	g__	s__	12297		4.88881	0.0217747	0.215613	0.0085409	0.00433013
p__Proteobacteria	c__Alphaproteobacteria	o__Sphingomonadales	f__Sphingomonadaceae	g__	s__	820086		4.92802	0.00239249	0.0710711	0.000830714	0.00166813
p__Actinobacteria	c__Actinobacteria	o__Actinomycetales	f__Microbacteriaceae	g__Salinibacterium	s__	876170		5.07783	0.00286515	0.0771495	0.000790178	0.000885908
p__Actinobacteria	c__Actinobacteria	o__Actinomycetales	f__Corynebacteriaceae	g__Corynebacterium	s__	1080820		5.30703	0.0018927	0.0616012	0.000222978	0.00119097
p__Proteobacteria	c__Gammaproteobacteria	o__Pseudomonadales	f__Moraxellaceae	g__Acinetobacter	s__	889025		5.46037	0.000779138	0.0281046	0.000155671	0.00463939
p__Cyanobacteria	c__Chloroplast	o__Streptophyta	f__	g__	s__	1141758		5.62641	0.0106597	0.149532	0.00127384	0.00297061
p__Bacteroidetes	c__Bacteroidia	o__Bacteroidales	f__Prevotellaceae	g__Prevotella	s__	246785		7.42608	0.000764621	0.0281046	3.88783e-06	0.000625497
p__Firmicutes	c__Bacilli	o__Lactobacillales	f__Streptococcaceae	g__Lactococcus	s__	716006		7.57606	3.70751e-06	0.000267471	0.000227365	0.0021392
p__Fusobacteria	c__Fusobacteriia	o__Fusobacteriales	f__Leptotrichiaceae	g__Leptotrichia	s__	31235		23.095	2.42277e-22	3.05875e-20	5.2319e-05	0.000663454
p__Spirochaetes	c__Spirochaetes	o__Spirochaetales	f__Spirochaetaceae	g__Treponema	s__	669126		23.239	4.54126e-30	1.14667e-27	8.07501e-05	0.000447507
p__Proteobacteria	c__Epsilonproteobacteria	o__Campylobacterales	f__Campylobacteraceae	g__Campylobacter	s__	32546		23.7915	1.81722e-22	3.05875e-20	4.09453e-05	0.00107701

## Sheet: Table 6 16s BPT vs. SPT
Phylum	Class	Order	Family	Genus	Specie	OTU#		logFC	pvalue	adj.P.Val	abundance.spt	abundance.bpt
OTU enriched in BPT
p__Proteobacteria	c__Gammaproteobacteria	o__Pseudomonadales	f__Pseudomonadaceae	g__Pseudomonas	s__	226299		-10.7739	0.000107914	0.000438004	0.0095331	0.01236
p__Planctomycetes	c__Planctomycetia	o__Planctomycetales	f__Planctomycetaceae	g__Planctomyces	s__	385507		-7.84386	2.31383e-07	1.74622e-06	2.13099e-06	0.00189013
p__Proteobacteria	c__Gammaproteobacteria	o__Pseudomonadales	f__Pseudomonadaceae	g__Pseudomonas	s__	225284		-7.37071	0.000179616	0.000688527	0.00384422	0.00555405
p__Cyanobacteria	c__Chloroplast	o__Streptophyta	f__	g__	s__	153978		-6.17374	0.000428059	0.00149821	0.000177105	0.00627627
p__OP3	c__PBS-25	o__	f__	g__	s__	512654		-5.57829	0.0152897	0.0351662	1.30388e-05	0.00151106
p__Firmicutes	c__Bacilli	o__Lactobacillales	f__Carnobacteriaceae	g__Trichococcus	s__	628293		-5.06944	0.08125	0.146432	0	0.00060171
p__Bacteroidetes	c__Flavobacteriia	o__Flavobacteriales	f__[Weeksellaceae]	g__Cloacibacterium	s__	1052264		-4.98772	0.000125273	0.000504223	8.72437e-05	0.0012623
p__Bacteroidetes	c__Flavobacteriia	o__Flavobacteriales	f__Flavobacteriaceae	g__Flavobacterium	s__	565425		-4.84495	0.0190929	0.0420359	0	0.0005056
p__Bacteroidetes	c__Sphingobacteriia	o__Sphingobacteriales	f__	g__	s__	2259380		-4.83393	0.00224586	0.00630838	6.06155e-05	0.000850932
p__Proteobacteria	c__Betaproteobacteria	o__Burkholderiales	f__Oxalobacteraceae	g__	s__	941487		-4.80363	0.000657494	0.00220534	0.000100822	0.00177887
p__Proteobacteria	c__Betaproteobacteria	o__Methylophilales	f__Methylophilaceae	g__	s__	788632		-4.55807	0.00251462	0.00694034	9.12236e-05	0.00097918
p__Bacteroidetes	c__Cytophagia	o__Cytophagales	f__Cytophagaceae	g__Flectobacillus	s__	610107		-4.52878	0.0308789	0.0640107	1.14121e-06	0.000940362
p__Bacteroidetes	c__Flavobacteriia	o__Flavobacteriales	f__Flavobacteriaceae	g__Flavobacterium	s__	816282		-4.50171	0.0119128	0.0279314	8.29343e-06	0.00183892
p__Proteobacteria	c__Alphaproteobacteria	o__Sphingomonadales	f__Erythrobacteraceae	g__	s__	814282		-4.47477	0.0104588	0.0248847	2.06102e-05	0.000560246
p__Bacteroidetes	c__[Saprospirae]	o__[Saprospirales]	f__Chitinophagaceae	g__	s__	875704		-4.4629	0.0191468	0.0420359	5.34562e-05	0.000579438
p__Proteobacteria	c__Gammaproteobacteria	o__Alteromonadales	f__Alteromonadaceae	g__Cellvibrio	s__	225453		-4.35602	0.00178351	0.00522083	8.95801e-06	0.00116316
p__Firmicutes	c__Clostridia	o__Clostridiales	f__Ruminococcaceae	g__Faecalibacterium	s__prausnitzii	514940		-4.33671	0.135959	0.219626	4.21991e-05	0.00244323
p__Bacteroidetes	c__Bacteroidia	o__Bacteroidales	f__Prevotellaceae	g__Prevotella	s__copri	588929		-4.25387	0.143616	0.228179	0	0.000796485
p__Planctomycetes	c__Planctomycetia	o__Planctomycetales	f__Planctomycetaceae	g__Planctomyces	s__	2553032		-4.23011	0.000976591	0.0031238	3.76645e-05	0.00125441
p__Proteobacteria	c__Alphaproteobacteria	o__Sphingomonadales	f__Sphingomonadaceae	g__Kaistobacter	s__	790545		-4.21579	0.0420181	0.082499	3.28066e-05	0.00115227
p__Bacteroidetes	c__Sphingobacteriia	o__Sphingobacteriales	f__	g__	s__	40351		-4.21116	0.0011438	0.00361082	0.000137881	0.00188942
p__Planctomycetes	c__Planctomycetia	o__Pirellulales	f__Pirellulaceae	g__	s__	1117031		-4.04424	0.0238187	0.0504581	0.000114527	0.00078363
p__[Thermi]	c__Deinococci	o__Deinococcales	f__Deinococcaceae	g__Deinococcus	s__	862949		-4.02574	0.166387	0.2524	1.09119e-05	0.00151832
p__Actinobacteria	c__Actinobacteria	o__Actinomycetales	f__Corynebacteriaceae	g__Corynebacterium	s__	1088305		-3.9522	0.0206699	0.0441932	0.000231792	0.00560274
p__Bacteroidetes	c__Flavobacteriia	o__Flavobacteriales	f__Flavobacteriaceae	g__Flavobacterium	s__	605681		-3.9489	0.00555789	0.0144326	2.3159e-05	0.000928187
p__Verrucomicrobia	c__Verrucomicrobiae	o__Verrucomicrobiales	f__Verrucomicrobiaceae	g__	s__	4369121		-3.9317	0.00819951	0.0201034	5.35131e-05	0.00155187
p__Proteobacteria	c__Gammaproteobacteria	o__Alteromonadales	f__Alteromonadaceae	g__Cellvibrio	s__	1134211		-3.91276	0.107645	0.179284	7.87388e-06	0.000542936
p__Bacteroidetes	c__Flavobacteriia	o__Flavobacteriales	f__Cryomorphaceae	g__	s__	231330		-3.86089	0.0800918	0.144885	1.38402e-05	0.000486357
p__Bacteroidetes	c__Flavobacteriia	o__Flavobacteriales	f__Flavobacteriaceae	g__Flavobacterium	s__columnare	923789		-3.78188	0.0647113	0.120678	1.98522e-05	0.000361746
p__Actinobacteria	c__Actinobacteria	o__Actinomycetales	f__Microbacteriaceae	g__Clavibacter	s__	356574		-3.73969	5.32033e-05	0.000231506	6.50231e-05	0.00172141
p__Proteobacteria	c__Gammaproteobacteria	o__Aeromonadales	f__Aeromonadaceae	g__	s__	837283		-3.71442	0.00181522	0.00528164	1.01935e-05	0.000331095
p__Proteobacteria	c__Gammaproteobacteria	o__Pseudomonadales	f__Moraxellaceae	g__Acinetobacter	s__	322927		-3.69291	0.155986	0.24259	9.23402e-05	0.00111527
p__Proteobacteria	c__Gammaproteobacteria	o__Legionellales	f__Coxiellaceae	g__Rickettsiella	s__	349901		-3.66913	0.018788	0.0416267	2.2478e-05	0.00104775
p__Actinobacteria	c__Actinobacteria	o__Actinomycetales	f__ACK-M1	g__	s__	242577		-3.65236	0.0053426	0.0140243	3.19417e-05	0.00133332
p__Bacteroidetes	c__[Saprospirae]	o__[Saprospirales]	f__	g__	s__	819699		-3.62986	0.01558	0.035496	4.94309e-05	0.00121666
p__Bacteroidetes	c__[Saprospirae]	o__[Saprospirales]	f__Chitinophagaceae	g__Sediminibacterium	s__	827051		-3.53733	0.00288167	0.00781938	2.20932e-05	0.000278569
p__Verrucomicrobia	c__Verrucomicrobiae	o__Verrucomicrobiales	f__Verrucomicrobiaceae	g__	s__	979941		-3.48568	0.0922956	0.161517	7.08726e-05	0.000870666
p__Planctomycetes	c__Planctomycetia	o__Gemmatales	f__Gemmataceae	g__Gemmata	s__	416617		-3.48118	0.0197162	0.0427036	3.05422e-05	0.000986638
p__Gemmatimonadetes	c__Gemmatimonadetes	o__Gemmatimonadales	f__Gemmatimonadaceae	g__Gemmatimonas	s__	1044938		-3.45658	0.0602031	0.113586	1.03092e-05	0.000407633
p__Proteobacteria	c__Alphaproteobacteria	o__Rhodobacterales	f__Rhodobacteraceae	g__Rhodobacter	s__	818854		-3.45291	0.00051109	0.00176326	5.51083e-05	0.00206748
p__Proteobacteria	c__Alphaproteobacteria	o__Sphingomonadales	f__Sphingomonadaceae	g__Sphingomonas	s__	548683		-3.42413	0.0776729	0.142646	8.10279e-06	0.000602784
p__Bacteroidetes	c__Flavobacteriia	o__Flavobacteriales	f__Flavobacteriaceae	g__Flavobacterium	s__	922724		-3.41641	0.09541	0.162838	2.99384e-05	0.000460629
p__Planctomycetes	c__Planctomycetia	o__Pirellulales	f__Pirellulaceae	g__	s__	771804		-3.36359	0.0965877	0.163691	2.53366e-05	0.000493634
p__Verrucomicrobia	c__Opitutae	o__Opitutales	f__Opitutaceae	g__Opitutus	s__	2565173		-3.33767	0.0785875	0.14374	2.07758e-05	0.00026486
p__Cyanobacteria	c__Chloroplast	o__Cryptophyta	f__	g__	s__	827773		-3.28329	0.230876	0.322705	0	0.000160849
p__Bacteroidetes	c__[Saprospirae]	o__[Saprospirales]	f__Chitinophagaceae	g__	s__	206752		-3.25263	0.140992	0.225174	2.18734e-05	0.000462252
p__Proteobacteria	c__Betaproteobacteria	o__Burkholderiales	f__Oxalobacteraceae	g__Janthinobacterium	s__lividum	832674		-3.22236	0.118656	0.194935	5.80724e-06	0.000339151
p__Verrucomicrobia	c__[Pedosphaerae]	o__[Pedosphaerales]	f__R4-41B	g__	s__	560147		-3.2091	0.164687	0.250927	7.73644e-05	0.00113017
p__Spirochaetes	c__[Leptospirae]	o__[Leptospirales]	f__Leptospiraceae	g__Turneriella	s__	4017244		-3.20286	0.043234	0.0842017	0.000148226	0.00214893
p__Planctomycetes	c__Planctomycetia	o__Gemmatales	f__Gemmataceae	g__Gemmata	s__	278140		-3.19956	0.271769	0.369759	2.79558e-05	0.000428828
p__Planctomycetes	c__Planctomycetia	o__Gemmatales	f__Isosphaeraceae	g__	s__	685193		-3.18961	0.0903943	0.159345	6.44502e-05	0.00127994
p__Firmicutes	c__Clostridia	o__Clostridiales	f__Clostridiaceae	g__SMB53	s__	555945		-3.1832	0.17754	0.263042	2.40745e-05	0.00078943
p__Bacteroidetes	c__[Saprospirae]	o__[Saprospirales]	f__Saprospiraceae	g__	s__	4404464		-3.17854	0.161736	0.247996	3.68033e-06	0.000796539
p__Bacteroidetes	c__Sphingobacteriia	o__Sphingobacteriales	f__	g__	s__	869513		-3.15691	0.278189	0.376173	7.22185e-07	0.000266634
p__Actinobacteria	c__Actinobacteria	o__Actinomycetales	f__Mycobacteriaceae	g__Mycobacterium	s__	1062748		-3.12525	0.020046	0.0432242	4.34862e-05	0.000933818
p__Proteobacteria	c__Gammaproteobacteria	o__Thiotrichales	f__Piscirickettsiaceae	g__	s__	817586		-3.11372	0.284888	0.381166	2.09989e-05	0.000301735
p__Actinobacteria	c__Actinobacteria	o__Actinomycetales	f__ACK-M1	g__	s__	545460		-3.084	0.289483	0.384835	1.189e-05	0.000177045
p__Proteobacteria	c__Alphaproteobacteria	o__	f__	g__	s__	1106545		-3.01377	0.0410745	0.0809754	2.81679e-05	0.00101
p__TM6	c__SJA-4	o__S1198	f__	g__	s__	556480		-2.97887	0.176519	0.262334	1.2883e-05	8.19424e-05
p__Planctomycetes	c__Planctomycetia	o__Planctomycetales	f__Planctomycetaceae	g__Planctomyces	s__	252045		-2.96158	0.0298992	0.0626675	2.47226e-05	0.00060142
p__Proteobacteria	c__Deltaproteobacteria	o__NB1-j	f__JTB38	g__	s__	808856		-2.95707	0.280328	0.377155	5.70526e-05	0.000217053
p__Proteobacteria	c__Betaproteobacteria	o__Burkholderiales	f__Comamonadaceae	g__	s__	635410		-2.93858	0.0704421	0.130358	3.34074e-06	0.000234754
p__Proteobacteria	c__Alphaproteobacteria	o__Sphingomonadales	f__Sphingomonadaceae	g__	s__	629320		-2.88862	0.0579265	0.10972	8.5035e-06	0.00031553
p__Proteobacteria	c__Betaproteobacteria	o__Burkholderiales	f__Oxalobacteraceae	g__Polynucleobacter	s__	550821		-2.85732	0.148641	0.233097	6.76721e-05	0.000175729
p__Proteobacteria	c__Betaproteobacteria	o__Burkholderiales	f__Comamonadaceae	g__Variovorax	s__paradoxus	1048878		-2.76672	0.00223663	0.00630838	8.22804e-05	0.000878534
p__Bacteroidetes	c__[Saprospirae]	o__[Saprospirales]	f__Saprospiraceae	g__	s__	2534		-2.76218	0.343009	0.437132	0	0.000303283
p__Proteobacteria	c__Betaproteobacteria	o__Methylophilales	f__Methylophilaceae	g__	s__	802011		-2.75589	0.0162572	0.0368648	8.207e-05	0.000789105
p__Bacteroidetes	c__Flavobacteriia	o__Flavobacteriales	f__[Weeksellaceae]	g__Chryseobacterium	s__	813781		-2.74467	0.00146219	0.00444176	0.000271654	0.00349273
p__Bacteroidetes	c__Sphingobacteriia	o__Sphingobacteriales	f__	g__	s__	660953		-2.72593	0.106529	0.17804	4.48373e-05	0.000844624
p__Proteobacteria	c__Gammaproteobacteria	o__Alteromonadales	f__[Chromatiaceae]	g__Rheinheimera	s__	569335		-2.71662	0.148389	0.233097	2.06582e-05	0.000265513
p__Proteobacteria	c__Alphaproteobacteria	o__Sphingomonadales	f__	g__	s__	570614		-2.71579	0.121294	0.197923	6.74249e-05	0.000148013
p__Bacteroidetes	c__Flavobacteriia	o__Flavobacteriales	f__Cryomorphaceae	g__Fluviicola	s__	2708478		-2.70439	0.194085	0.27983	6.02706e-05	0.000437424
p__Bacteroidetes	c__Cytophagia	o__Cytophagales	f__Cytophagaceae	g__	s__	560704		-2.69865	0.275927	0.374362	5.09069e-05	0.000311775
p__Bacteroidetes	c__Flavobacteriia	o__Flavobacteriales	f__Cryomorphaceae	g__Fluviicola	s__	650001		-2.69851	0.000301493	0.00111161	0.000341454	0.00457271
p__Actinobacteria	c__Actinobacteria	o__Actinomycetales	f__Micrococcaceae	g__Microbispora	s__rosea	530833		-2.69737	0.353866	0.448601	0.000132677	0.000573143
p__Proteobacteria	c__Betaproteobacteria	o__Burkholderiales	f__	g__	s__	4445604		-2.66099	2.88231e-05	0.000133861	1.10303e-05	0.000145908
p__Bacteroidetes	c__Cytophagia	o__Cytophagales	f__Cyclobacteriaceae	g__	s__	643122		-2.637	0.290021	0.384835	2.82754e-06	0.000235358
p__Bacteroidetes	c__[Saprospirae]	o__[Saprospirales]	f__Saprospiraceae	g__	s__	773575		-2.61225	0.294763	0.390057	1.76636e-05	0.000642593
p__Proteobacteria	c__Betaproteobacteria	o__Burkholderiales	f__Oxalobacteraceae	g__Ralstonia	s__	415661		-2.5657	4.73288e-06	2.72973e-05	3.6232e-05	0.000461316
p__Actinobacteria	c__Actinobacteria	o__Actinomycetales	f__Microbacteriaceae	g__Candidatus	s__rubra	4383820		-2.55087	0.0009605	0.00309281	7.64614e-05	0.000504055
p__Verrucomicrobia	c__Verrucomicrobiae	o__Verrucomicrobiales	f__Verrucomicrobiaceae	g__Prosthecobacter	s__debontii	1118931		-2.54235	0.0936666	0.162008	3.19936e-06	0.000294713
p__Bacteroidetes	c__Sphingobacteriia	o__Sphingobacteriales	f__	g__	s__	1087471		-2.54219	0.372961	0.465479	8.75901e-05	0.000959564
p__Bacteroidetes	c__Flavobacteriia	o__Flavobacteriales	f__Cryomorphaceae	g__	s__	990405		-2.5338	0.116853	0.192628	2.50289e-05	0.000638704
p__Proteobacteria	c__Alphaproteobacteria	o__Sphingomonadales	f__Sphingomonadaceae	g__Sphingomonas	s__	1003206		-2.51611	0.00157246	0.00471739	0.000857809	0.00917962
p__Actinobacteria	c__Actinobacteria	o__Actinomycetales	f__Microbacteriaceae	g__Candidatus	s__	810672		-2.5097	2.49757e-05	0.000118268	0.000631637	0.00578791
p__Cyanobacteria	c__Chloroplast	o__Stramenopiles	f__	g__	s__	532888		-2.49385	0.00635228	0.0160636	2.98897e-05	0.000347883
p__Proteobacteria	c__Alphaproteobacteria	o__Sphingomonadales	f__	g__	s__	690867		-2.43883	0.231942	0.322847	4.22778e-05	0.000353783
p__Proteobacteria	c__Alphaproteobacteria	o__Rhizobiales	f__Methylobacteriaceae	g__Methylobacterium	s__	1060565		-2.4289	0.0329531	0.0680186	0.000281678	0.00171062
p__Bacteroidetes	c__[Saprospirae]	o__[Saprospirales]	f__	g__	s__	2554		-2.39004	0.0194527	0.0425143	0.000239466	0.00320731
p__Proteobacteria	c__Betaproteobacteria	o__Burkholderiales	f__Oxalobacteraceae	g__	s__	647097		-2.37187	2.27475e-05	0.000109871	4.52778e-05	0.000438685
p__Proteobacteria	c__Betaproteobacteria	o__Burkholderiales	f__Comamonadaceae	g__	s__	1051459		-2.3709	0.0195928	0.0426275	1.9256e-05	0.00020612
p__Bacteroidetes	c__[Saprospirae]	o__[Saprospirales]	f__Chitinophagaceae	g__	s__	1081231		-2.34371	0.0183845	0.0410008	0.00054608	0.00686555
p__Proteobacteria	c__Alphaproteobacteria	o__Rickettsiales	f__mitochondria	g__Nelumbo	s__nucifera	1646259		-2.33731	0.153079	0.239279	0.000272371	0.00196648
p__Proteobacteria	c__Gammaproteobacteria	o__Pseudomonadales	f__Pseudomonadaceae	g__	s__	769643		-2.30322	0.0067156	0.0168064	1.92713e-05	0.000186201
p__Planctomycetes	c__Planctomycetia	o__Gemmatales	f__Gemmataceae	g__Gemmata	s__	2339928		-2.29635	0.0818246	0.146919	7.79093e-05	0.00103909
p__Proteobacteria	c__Betaproteobacteria	o__Procabacteriales	f__Procabacteriaceae	g__	s__	985056		-2.26858	0.315846	0.408379	5.25585e-06	7.83068e-05
p__Cyanobacteria	c__Chloroplast	o__Cryptophyta	f__	g__	s__	579331		-2.2526	0.0827724	0.147524	7.43323e-05	0.00170965
p__Bacteroidetes	c__Cytophagia	o__Cytophagales	f__Cytophagaceae	g__	s__	616971		-2.21879	0.315023	0.408379	1.99033e-05	0.0003831
p__Bacteroidetes	c__Cytophagia	o__Cytophagales	f__Cytophagaceae	g__	s__	4322804		-2.19976	0.283311	0.380109	7.79607e-06	0.000140509
p__Firmicutes	c__Bacilli	o__Lactobacillales	f__Streptococcaceae	g__Lactococcus	s__	716006		-2.18414	0.203549	0.292602	0.000589199	0.00205375
p__Cyanobacteria	c__4C0d-2	o__YS2	f__	g__	s__	578358		-2.16626	0.357568	0.452108	3.08138e-05	0.000769833
p__Bacteroidetes	c__Flavobacteriia	o__Flavobacteriales	f__Cryomorphaceae	g__	s__	4328366		-2.15242	0.225953	0.319109	6.6152e-06	0.000106225
p__Proteobacteria	c__Alphaproteobacteria	o__Sphingomonadales	f__Sphingomonadaceae	g__	s__	820086		-2.13647	0.157566	0.243144	0.000248551	0.00168028
p__Bacteroidetes	c__Flavobacteriia	o__Flavobacteriales	f__[Weeksellaceae]	g__Chryseobacterium	s__	891635		-2.11302	0.000144251	0.000561882	5.07416e-05	0.000379508
p__OD1	c__ABY1	o__	f__	g__	s__	779795		-2.10412	0.0959324	0.163153	0.000446411	0.000672499
p__Actinobacteria	c__Actinobacteria	o__Actinomycetales	f__	g__	s__	585063		-2.09052	0.0184206	0.0410008	0.000135652	0.00149526
p__Proteobacteria	c__Betaproteobacteria	o__Burkholderiales	f__Comamonadaceae	g__Comamonas	s__	656774		-2.07973	0.0857972	0.151795	6.64937e-05	0.000246333
p__Proteobacteria	c__Betaproteobacteria	o__Burkholderiales	f__Oxalobacteraceae	g__	s__	759916		-2.0741	3.86867e-05	0.000171428	0.0060104	0.0535628
p__Bacteroidetes	c__Flavobacteriia	o__Flavobacteriales	f__Flavobacteriaceae	g__Flavobacterium	s__succinicans	970921		-2.05903	3.89207e-08	3.29802e-07	0.000397558	0.00355014
p__Bacteroidetes	c__Sphingobacteriia	o__Sphingobacteriales	f__	g__	s__	1032692		-2.05002	0.481503	0.564481	5.72698e-06	0.000241548
p__Bacteroidetes	c__Flavobacteriia	o__Flavobacteriales	f__Flavobacteriaceae	g__Flavobacterium	s__	461206		-2.04955	5.42156e-05	0.000233805	6.34253e-05	0.000746011
p__Actinobacteria	c__Actinobacteria	o__Actinomycetales	f__	g__	s__	624227		-2.04681	0.0139758	0.0322982	0.000199278	0.00193999
p__Proteobacteria	c__Gammaproteobacteria	o__Enterobacteriales	f__Enterobacteriaceae	g__	s__	528421		-2.04603	0.0948817	0.162704	2.26077e-05	0.000188977
p__Actinobacteria	c__Actinobacteria	o__Actinomycetales	f__Corynebacteriaceae	g__Corynebacterium	s__	450209		-2.04499	0.388173	0.475857	2.23194e-05	0.000708935
p__Proteobacteria	c__Betaproteobacteria	o__Burkholderiales	f__Comamonadaceae	g__	s__	791738		-2.00924	0.168485	0.254307	4.25236e-05	0.000841418
p__Proteobacteria	c__Betaproteobacteria	o__Burkholderiales	f__Comamonadaceae	g__Acidovorax	s__	931643		-2.00483	0.0354644	0.0722756	8.26792e-05	0.000194327
p__Bacteroidetes	c__Sphingobacteriia	o__Sphingobacteriales	f__	g__	s__	995583		-1.98978	0.428249	0.514538	1.90677e-05	0.000600079
p__Verrucomicrobia	c__Verrucomicrobiae	o__Verrucomicrobiales	f__Verrucomicrobiaceae	g__Prosthecobacter	s__debontii	950620		-1.97681	0.0798856	0.144885	0.000121638	0.00154946
p__Bacteroidetes	c__Flavobacteriia	o__Flavobacteriales	f__Flavobacteriaceae	g__Flavobacterium	s__	1055322		-1.9763	6.3534e-08	5.29085e-07	0.000495024	0.00412322
p__Bacteroidetes	c__Sphingobacteriia	o__Sphingobacteriales	f__	g__	s__	1114591		-1.97453	0.207782	0.296919	5.53686e-05	0.000668905
p__Proteobacteria	c__Betaproteobacteria	o__Burkholderiales	f__Oxalobacteraceae	g__	s__	814363		-1.96272	7.45055e-05	0.000312923	8.9696e-05	0.00069465
p__Verrucomicrobia	c__Verrucomicrobiae	o__Verrucomicrobiales	f__Verrucomicrobiaceae	g__Prosthecobacter	s__	516569		-1.958	0.0508229	0.0977987	0.0014493	0.0137707
p__Cyanobacteria	c__Chloroplast	o__Streptophyta	f__	g__	s__	2307137		-1.95444	0.180942	0.266448	4.07296e-05	0.00048125
p__Actinobacteria	c__Actinobacteria	o__Actinomycetales	f__Micrococcaceae	g__	s__	1081815		-1.95165	0.100928	0.170186	0.000111062	0.00127831
p__Actinobacteria	c__Actinobacteria	o__Actinomycetales	f__Micrococcaceae	g__Micrococcus	s__	1101451		-1.93014	0.108369	0.179871	0.000315546	0.00211392
p__Proteobacteria	c__Gammaproteobacteria	o__Pseudomonadales	f__Moraxellaceae	g__Acinetobacter	s__johnsonii	988314		-1.9204	0.0106395	0.0251905	0.00134157	0.00988895
p__Actinobacteria	c__Actinobacteria	o__Actinomycetales	f__Corynebacteriaceae	g__Corynebacterium	s__durum	1068572		-1.91999	0.384861	0.472997	8.14835e-05	0.000403893
p__Proteobacteria	c__Gammaproteobacteria	o__Enterobacteriales	f__Enterobacteriaceae	g__Enterobacter	s__arachidis	687940		-1.90787	0.14831	0.233097	5.84131e-05	0.000906595
p__Proteobacteria	c__Alphaproteobacteria	o__Sphingomonadales	f__Sphingomonadaceae	g__	s__	548040		-1.90395	0.257096	0.351777	0.0001381	0.000893671
p__Proteobacteria	c__Betaproteobacteria	o__Neisseriales	f__Neisseriaceae	g__Aquaspirillum	s__putridiconchylium	1125946		-1.89896	0.318195	0.408745	9.4148e-06	0.000183608
p__Bacteroidetes	c__Flavobacteriia	o__Flavobacteriales	f__Flavobacteriaceae	g__Flavobacterium	s__	583388		-1.89106	0.000329455	0.00117005	0.00110983	0.009661
p__Acidobacteria	c__Solibacteres	o__Solibacterales	f__[Bryobacteraceae]	g__Bryobacter	s__	540593		-1.85842	0.460386	0.549053	1.0014e-05	0.000195425
p__Cyanobacteria	c__4C0d-2	o__YS2	f__	g__	s__	537033		-1.84477	0.173711	0.25976	6.03697e-05	0.00117856
p__Bacteroidetes	c__Flavobacteriia	o__Flavobacteriales	f__Flavobacteriaceae	g__Flavobacterium	s__succinicans	649373		-1.83186	0.18613	0.27152	6.2414e-05	0.000908875
p__Verrucomicrobia	c__Verrucomicrobiae	o__Verrucomicrobiales	f__Verrucomicrobiaceae	g__Luteolibacter	s__	145278		-1.81968	0.164546	0.250927	8.59669e-05	0.000634343
p__Proteobacteria	c__Betaproteobacteria	o__Burkholderiales	f__Comamonadaceae	g__	s__	1104733		-1.80761	0.062924	0.118258	0.000557997	0.00449635
p__Acidobacteria	c__[Chloracidobacteria]	o__PK29	f__	g__	s__	3691868		-1.80327	0.404593	0.491001	8.81845e-05	0.000731852
p__Verrucomicrobia	c__Opitutae	o__Opitutales	f__Opitutaceae	g__Opitutus	s__	592129		-1.80273	0.522151	0.600473	0.000215626	0.000150627
p__Proteobacteria	c__Betaproteobacteria	o__Burkholderiales	f__Comamonadaceae	g__	s__	1106617		-1.79923	6.10531e-06	3.42891e-05	0.00146113	0.0105816
p__Armatimonadetes	c__Armatimonadia	o__Armatimonadales	f__Armatimonadaceae	g__Armatimonas	s__	141815		-1.79377	0.233848	0.324565	2.49459e-05	0.000531059
p__Bacteroidetes	c__Flavobacteriia	o__Flavobacteriales	f__[Weeksellaceae]	g__Chryseobacterium	s__	1010721		-1.78644	0.00120765	0.00378764	5.72793e-05	0.000385564
p__Proteobacteria	c__Gammaproteobacteria	o__Xanthomonadales	f__Xanthomonadaceae	g__Luteimonas	s__	1052930		-1.78589	0.265031	0.361609	5.63372e-05	0.000540567
p__Acidobacteria	c__Acidobacteria-6	o__iii1-15	f__mb2424	g__	s__	815859		-1.76827	0.186635	0.27152	0.000207929	0.000576531
p__Actinobacteria	c__Acidimicrobiia	o__Acidimicrobiales	f__	g__	s__	949545		-1.74824	0.171646	0.258272	0.000118377	0.00118876
p__Bacteroidetes	c__Cytophagia	o__Cytophagales	f__Cytophagaceae	g__	s__	304640		-1.73326	0.00121931	0.00379954	0.000709124	0.00693431
p__Bacteroidetes	c__[Saprospirae]	o__[Saprospirales]	f__Chitinophagaceae	g__	s__	572138		-1.72662	0.20684	0.29645	6.04567e-05	0.00057734
p__Actinobacteria	c__Actinobacteria	o__Actinomycetales	f__Microbacteriaceae	g__	s__	1074625		-1.71371	0.187236	0.271576	0.000123858	0.000471435
p__Cyanobacteria	c__Chloroplast	o__Streptophyta	f__	g__	s__	3541		-1.6662	0.518476	0.597671	4.60526e-05	0.000528898
p__Bacteroidetes	c__Flavobacteriia	o__Flavobacteriales	f__Cryomorphaceae	g__Fluviicola	s__	325694		-1.65879	0.0302624	0.0630031	0.00013555	0.000690699
p__Proteobacteria	c__Alphaproteobacteria	o__Rhizobiales	f__Methylobacteriaceae	g__Methylobacterium	s__	926160		-1.65404	0.0788637	0.14374	0.00107608	0.00667348
p__Proteobacteria	c__Gammaproteobacteria	o__Acidithiobacillales	f__	g__	s__	817349		-1.62787	0.325205	0.416642	1.84774e-05	0.000137728
p__Bacteroidetes	c__Flavobacteriia	o__Flavobacteriales	f__Flavobacteriaceae	g__Flavobacterium	s__	717095		-1.62554	0.000252333	0.000952163	4.50453e-05	0.000280303
p__Actinobacteria	c__Actinobacteria	o__Actinomycetales	f__Intrasporangiaceae	g__Janibacter	s__	1084157		-1.61911	0.360573	0.454717	0.000251955	0.000227803
p__Proteobacteria	c__Betaproteobacteria	o__Burkholderiales	f__Comamonadaceae	g__Limnohabitans	s__	1108275		-1.60374	0.000321914	0.00116548	0.000619768	0.00441167
p__Proteobacteria	c__Gammaproteobacteria	o__Legionellales	f__Legionellaceae	g__Legionella	s__	897411		-1.57652	0.464709	0.551485	4.9908e-05	0.000503186
p__Proteobacteria	c__Betaproteobacteria	o__Methylophilales	f__Methylophilaceae	g__Methylotenera	s__mobilis	577152		-1.57017	0.229743	0.322575	2.73824e-05	0.000425804
p__Actinobacteria	c__Actinobacteria	o__Actinomycetales	f__Corynebacteriaceae	g__Corynebacterium	s__	1069816		-1.56435	0.427728	0.514538	0.00147181	0.00252453
p__Bacteroidetes	c__Sphingobacteriia	o__Sphingobacteriales	f__	g__	s__	245345		-1.55756	0.125744	0.204493	0.000375915	0.00098622
p__Bacteroidetes	c__Cytophagia	o__Cytophagales	f__Cytophagaceae	g__Leadbetterella	s__	913174		-1.54303	0.392728	0.480222	0.000284145	0.000874425
p__Proteobacteria	c__Betaproteobacteria	o__Burkholderiales	f__Comamonadaceae	g__Aquabacterium	s__	942852		-1.54295	0.0919037	0.161416	0.000369811	0.00103568
p__Proteobacteria	c__Betaproteobacteria	o__Burkholderiales	f__Comamonadaceae	g__Ramlibacter	s__	895220		-1.53623	0.0390321	0.0782262	5.15723e-05	0.000354489
p__Verrucomicrobia	c__Verrucomicrobiae	o__Verrucomicrobiales	f__Verrucomicrobiaceae	g__	s__	19930		-1.5354	0.595415	0.667252	4.5338e-05	0.000311466
p__Bacteroidetes	c__Flavobacteriia	o__Flavobacteriales	f__[Weeksellaceae]	g__Chryseobacterium	s__	810955		-1.53076	0.0154328	0.0353272	0.00482485	0.025866
p__Bacteroidetes	c__Flavobacteriia	o__Flavobacteriales	f__Flavobacteriaceae	g__Flavobacterium	s__	960076		-1.52193	6.85284e-05	0.000292913	0.0242069	0.13896
p__Proteobacteria	c__	o__	f__	g__	s__	552576		-1.4956	0.308321	0.403575	0.000119822	0.000689571
p__Bacteroidetes	c__[Saprospirae]	o__[Saprospirales]	f__Chitinophagaceae	g__Sediminibacterium	s__	781203		-1.46619	0.139265	0.223471	0.000277219	0.00190661
p__Proteobacteria	c__Gammaproteobacteria	o__Xanthomonadales	f__Sinobacteraceae	g__	s__	1053194		-1.46347	0.463275	0.551138	4.72382e-05	0.000283552
p__Firmicutes	c__Bacilli	o__Bacillales	f__[Thermicanaceae]	g__Thermicanus	s__	439457		-1.44303	0.613924	0.680104	3.3395e-05	0.00041084
p__Bacteroidetes	c__Flavobacteriia	o__Flavobacteriales	f__Flavobacteriaceae	g__Flavobacterium	s__	699027		-1.4132	3.95602e-06	2.33019e-05	0.000265181	0.00147856
p__Actinobacteria	c__Actinobacteria	o__Actinomycetales	f__Corynebacteriaceae	g__Corynebacterium	s__	984831		-1.41288	0.0847686	0.150527	0.000952179	0.00386127
p__Proteobacteria	c__Betaproteobacteria	o__Burkholderiales	f__Burkholderiaceae	g__	s__	1105280		-1.41108	0.27882	0.376173	0.000362475	0.00133648
p__Actinobacteria	c__Actinobacteria	o__Actinomycetales	f__Dermacoccaceae	g__Dermacoccus	s__	369064		-1.39596	0.351541	0.446828	0.000111618	0.000675565
p__Verrucomicrobia	c__Verrucomicrobiae	o__Verrucomicrobiales	f__Verrucomicrobiaceae	g__Prosthecobacter	s__	4468331		-1.3788	0.210912	0.300503	0.000815941	0.00506151
p__Proteobacteria	c__Alphaproteobacteria	o__Rhizobiales	f__Methylobacteriaceae	g__	s__	785526		-1.37809	0.0388194	0.078124	0.00322398	0.0166652
p__Proteobacteria	c__Alphaproteobacteria	o__Rhizobiales	f__Hyphomicrobiaceae	g__Hyphomicrobium	s__	4470542		-1.35927	0.589191	0.663355	1.43151e-05	0.000105747
p__Proteobacteria	c__Betaproteobacteria	o__Burkholderiales	f__Comamonadaceae	g__	s__	1039594		-1.35116	0.0125686	0.0291858	6.18783e-05	0.000322937
p__Proteobacteria	c__Betaproteobacteria	o__Burkholderiales	f__Comamonadaceae	g__	s__	846710		-1.3486	0.0353212	0.0722756	2.64304e-05	0.000173333
p__Proteobacteria	c__Alphaproteobacteria	o__Rickettsiales	f__	g__	s__	40401		-1.30099	0.490839	0.572608	7.11003e-05	0.000478531
p__Proteobacteria	c__Alphaproteobacteria	o__Rhodobacterales	f__Rhodobacteraceae	g__Rhodobacter	s__	746799		-1.29563	0.173318	0.25976	7.52412e-05	0.000493295
p__Bacteroidetes	c__Flavobacteriia	o__Flavobacteriales	f__[Weeksellaceae]	g__Chryseobacterium	s__	1039092		-1.29031	0.317064	0.408379	3.37091e-05	0.00033001
p__Proteobacteria	c__Betaproteobacteria	o__Burkholderiales	f__Comamonadaceae	g__Hydrogenophaga	s__	888396		-1.28579	0.0402668	0.0800365	0.000341259	0.00238608
p__Proteobacteria	c__Alphaproteobacteria	o__Rhizobiales	f__Bradyrhizobiaceae	g__Bradyrhizobium	s__	1105814		-1.2815	0.229296	0.322575	0.000108582	0.000493813
p__Proteobacteria	c__Betaproteobacteria	o__Burkholderiales	f__Comamonadaceae	g__	s__	1106324		-1.25662	0.00148842	0.00449317	0.000617019	0.00372866
p__Proteobacteria	c__Betaproteobacteria	o__Burkholderiales	f__Comamonadaceae	g__	s__	719367		-1.22418	0.10116	0.170186	0.000161049	0.00105251
p__Verrucomicrobia	c__Verrucomicrobiae	o__Verrucomicrobiales	f__Verrucomicrobiaceae	g__Luteolibacter	s__	973942		-1.22015	0.314392	0.408379	0.000226801	0.00154302
p__Proteobacteria	c__Betaproteobacteria	o__Burkholderiales	f__Comamonadaceae	g__Rhodoferax	s__	859945		-1.21279	0.397561	0.484904	0.000276471	0.00104865
p__Proteobacteria	c__Gammaproteobacteria	o__Xanthomonadales	f__Xanthomonadaceae	g__Dokdonella	s__	569066		-1.204	0.477973	0.561706	1.44343e-05	0.000155806
p__Cyanobacteria	c__Chloroplast	o__Streptophyta	f__	g__	s__	769222		-1.19664	0.251613	0.347201	0.00109354	0.00566773
p__Proteobacteria	c__Gammaproteobacteria	o__Pseudomonadales	f__Pseudomonadaceae	g__Pseudomonas	s__	646549		-1.15122	0.133246	0.215966	0.00183446	0.0069244
p__Proteobacteria	c__Betaproteobacteria	o__Burkholderiales	f__Comamonadaceae	g__Tepidimonas	s__	697479		-1.14814	0.378053	0.469352	9.67414e-05	0.000485475
p__Proteobacteria	c__Betaproteobacteria	o__Burkholderiales	f__Comamonadaceae	g__Comamonas	s__	1024520		-1.10938	0.316916	0.408379	3.43189e-05	0.000406533
p__Actinobacteria	c__Actinobacteria	o__Actinomycetales	f__Nocardiaceae	g__Rhodococcus	s__	573976		-1.06769	0.141258	0.225174	0.000393763	0.00232405
p__Proteobacteria	c__Alphaproteobacteria	o__Sphingomonadales	f__	g__	s__	384499		-1.06628	0.472096	0.556152	3.00429e-05	0.00028259
p__Actinobacteria	c__Actinobacteria	o__Actinomycetales	f__Corynebacteriaceae	g__Corynebacterium	s__	1011712		-1.0529	0.493178	0.572608	6.76099e-05	0.000958156
p__Proteobacteria	c__Gammaproteobacteria	o__Enterobacteriales	f__Enterobacteriaceae	g__Erwinia	s__	922761		-1.04754	0.221522	0.314691	0.00179215	0.00691283
p__Proteobacteria	c__Alphaproteobacteria	o__Rhizobiales	f__Bradyrhizobiaceae	g__	s__	580625		-1.00448	0.342189	0.437132	0.0047561	0.0231141
p__Proteobacteria	c__Alphaproteobacteria	o__Rhizobiales	f__Methylobacteriaceae	g__Methylobacterium	s__	574655		-0.975753	0.252314	0.347201	0.000550738	0.00189135
p__Cyanobacteria	c__Chloroplast	o__Streptophyta	f__	g__	s__	829354		-0.959559	0.593312	0.666441	3.6927e-05	0.000207369
p__Actinobacteria	c__Acidimicrobiia	o__Acidimicrobiales	f__	g__	s__	510547		-0.918092	0.555078	0.633813	0.000147608	0.000292455
p__Actinobacteria	c__Thermoleophilia	o__Gaiellales	f__Gaiellaceae	g__	s__	811263		-0.906815	0.617321	0.682303	1.6553e-05	0.000260583
p__Proteobacteria	c__Betaproteobacteria	o__Burkholderiales	f__Comamonadaceae	g__	s__	225259		-0.901421	0.363	0.456586	1.88669e-05	0.000300364
p__Bacteroidetes	c__[Saprospirae]	o__[Saprospirales]	f__Chitinophagaceae	g__	s__	551895		-0.870003	0.512723	0.592452	7.44321e-05	0.00042588
p__Bacteroidetes	c__Sphingobacteriia	o__Sphingobacteriales	f__	g__	s__	796406		-0.853429	0.570695	0.648578	0.00014903	0.000671734
p__Proteobacteria	c__Alphaproteobacteria	o__Rhizobiales	f__	g__	s__	1140644		-0.8494	0.613543	0.680104	0.000547364	0.00101732
p__Proteobacteria	c__Alphaproteobacteria	o__Rickettsiales	f__mitochondria	g__Spirodela	s__polyrhiza	1892252		-0.817406	0.729618	0.779658	5.81814e-05	0.000559684
p__Proteobacteria	c__Betaproteobacteria	o__Rhodocyclales	f__Rhodocyclaceae	g__	s__	815406		-0.807661	0.701101	0.755875	2.90228e-05	7.99844e-05
p__Proteobacteria	c__Betaproteobacteria	o__Neisseriales	f__Neisseriaceae	g__	s__	933546		-0.806061	0.468744	0.55491	0.000748589	0.00431642
p__Proteobacteria	c__Gammaproteobacteria	o__Enterobacteriales	f__Enterobacteriaceae	g__	s__	1111294		-0.802014	0.231172	0.322705	0.00265843	0.00656768
p__Actinobacteria	c__Actinobacteria	o__Actinomycetales	f__Nocardiaceae	g__Rhodococcus	s__	915948		-0.787369	0.301275	0.396501	0.000722598	0.00348545
p__Bacteroidetes	c__Sphingobacteriia	o__Sphingobacteriales	f__Sphingobacteriaceae	g__Sphingobacterium	s__multivorum	891031		-0.779017	0.381803	0.471551	0.000525224	0.00336959
p__GN02	c__BD1-5	o__	f__	g__	s__	4021961		-0.773524	0.366951	0.460357	0.000256893	0.00115576
p__Proteobacteria	c__Betaproteobacteria	o__Burkholderiales	f__Oxalobacteraceae	g__Polynucleobacter	s__	564411		-0.768768	0.120737	0.197682	0.000953741	0.00412177
p__Proteobacteria	c__Alphaproteobacteria	o__Rhizobiales	f__Bradyrhizobiaceae	g__	s__	303643		-0.764727	0.470318	0.555413	0.000293069	0.0017369
p__Planctomycetes	c__Planctomycetia	o__Gemmatales	f__Gemmataceae	g__Gemmata	s__	1719556		-0.762195	0.63856	0.699375	0.000214082	0.000830374
p__Planctomycetes	c__Planctomycetia	o__Gemmatales	f__Gemmataceae	g__Gemmata	s__	1061642		-0.753906	0.728824	0.779658	0.000221177	0.000313036
p__Proteobacteria	c__Alphaproteobacteria	o__Caulobacterales	f__Caulobacteraceae	g__	s__	288283		-0.729099	0.583578	0.659662	0.000289559	0.000386588
p__Proteobacteria	c__Gammaproteobacteria	o__Pseudomonadales	f__Moraxellaceae	g__Acinetobacter	s__	889025		-0.696491	0.609986	0.680104	0.000339167	0.000697944
p__Actinobacteria	c__Actinobacteria	o__Actinomycetales	f__Gordoniaceae	g__Gordonia	s__	788023		-0.650939	0.747801	0.796092	2.59634e-05	0.000814051
p__Proteobacteria	c__Betaproteobacteria	o__Neisseriales	f__Neisseriaceae	g__	s__	3393186		-0.648945	0.538456	0.61629	0.000104887	0.000606074
p__Proteobacteria	c__Alphaproteobacteria	o__Rickettsiales	f__mitochondria	g__Pythium	s__ultimum	2343601		-0.641071	0.767585	0.811255	6.27467e-05	0.000129245
p__Cyanobacteria	c__Chloroplast	o__Cryptophyta	f__	g__	s__	209603		-0.627858	0.788043	0.829247	4.48225e-05	0.000510062
p__Proteobacteria	c__Alphaproteobacteria	o__Sphingomonadales	f__Sphingomonadaceae	g__	s__	813418		-0.625658	0.582828	0.659662	7.98743e-05	0.000387437
p__Bacteroidetes	c__Flavobacteriia	o__Flavobacteriales	f__Flavobacteriaceae	g__Flavobacterium	s__	425968		-0.618136	0.304857	0.400124	0.000201374	0.000874467
p__Firmicutes	c__Bacilli	o__Bacillales	f__Paenibacillaceae	g__Paenibacillus	s__	1081222		-0.597367	0.637333	0.699375	0.000635114	0.00128312
p__Firmicutes	c__Bacilli	o__Gemellales	f__Gemellaceae	g__	s__	1065569		-0.550171	0.748294	0.796092	0.000508111	0.000702666
p__Proteobacteria	c__Alphaproteobacteria	o__Caulobacterales	f__Caulobacteraceae	g__	s__	310003		-0.516961	0.694256	0.750738	0.000426937	0.000657342
p__Actinobacteria	c__Actinobacteria	o__Actinomycetales	f__Micrococcaceae	g__	s__	1002005		-0.495022	0.652	0.710871	0.000574651	0.00223017
p__Firmicutes	c__Bacilli	o__Bacillales	f__Staphylococcaceae	g__Staphylococcus	s__	1084865		-0.492997	0.37085	0.464043	0.00580977	0.0198087
p__Proteobacteria	c__Alphaproteobacteria	o__Sphingomonadales	f__	g__	s__	729513		-0.477614	0.819165	0.85455	1.00194e-05	0.000305273
p__Proteobacteria	c__Alphaproteobacteria	o__Rhizobiales	f__	g__	s__	567336		-0.467921	0.872023	0.89424	7.96757e-05	0.000295921
p__Proteobacteria	c__Betaproteobacteria	o__Burkholderiales	f__Comamonadaceae	g__Aquincola	s__tertiaricarbonis	940737		-0.431921	0.625299	0.689542	0.000431926	0.00114094
p__Actinobacteria	c__Actinobacteria	o__Actinomycetales	f__Nocardiaceae	g__Rhodococcus	s__	278795		-0.429225	0.662053	0.720207	0.000138343	0.000760025
p__Proteobacteria	c__Betaproteobacteria	o__Procabacteriales	f__Procabacteriaceae	g__	s__	155812		-0.411932	0.841983	0.869902	0.000111234	0.000300315
p__Proteobacteria	c__Gammaproteobacteria	o__Xanthomonadales	f__Xanthomonadaceae	g__	s__	1083508		-0.378168	0.862862	0.888619	0.000108987	0.000477034
p__Cyanobacteria	c__Chloroplast	o__Stramenopiles	f__	g__	s__	569835		-0.361125	0.689614	0.748502	0.000406297	0.00157389
p__Proteobacteria	c__Gammaproteobacteria	o__Aeromonadales	f__Aeromonadaceae	g__	s__	839235		-0.330405	0.835634	0.866119	4.88936e-05	0.000183809
p__Proteobacteria	c__Gammaproteobacteria	o__Pseudomonadales	f__Pseudomonadaceae	g__Pseudomonas	s__	974121		-0.264331	0.823159	0.856866	0.000475648	0.00141582
p__Bacteroidetes	c__Flavobacteriia	o__Flavobacteriales	f__Cryomorphaceae	g__Fluviicola	s__	103229		-0.224627	0.796705	0.834725	0.0004378	0.00141469
p__Proteobacteria	c__Gammaproteobacteria	o__Pseudomonadales	f__Pseudomonadaceae	g__Pseudomonas	s__	829851		-0.202289	0.887271	0.906296	0.000742459	0.000757413
p__Proteobacteria	c__Alphaproteobacteria	o__Rhizobiales	f__Bradyrhizobiaceae	g__Pseudomonas	s__carboxydohydrogena	709971		-0.159694	0.891285	0.906296	0.000106371	0.00065262
p__Actinobacteria	c__Actinobacteria	o__Actinomycetales	f__ACK-M1	g__	s__	830978		-0.122256	0.936097	0.945396	0.000142229	0.000439795
p__Actinobacteria	c__Actinobacteria	o__Actinomycetales	f__Corynebacteriaceae	g__Corynebacterium	s__	1047041		-0.0865398	0.940933	0.946814	0.000804663	0.00216465
p__Proteobacteria	c__Betaproteobacteria	o__Burkholderiales	f__Comamonadaceae	g__Ramlibacter	s__	937372		-0.077981	0.931017	0.944708	0.000258333	0.000623498
OTU enriched in SPT
p__Proteobacteria	c__Betaproteobacteria	o__Burkholderiales	f__Comamonadaceae	g__Methylibium	s__	1108726		0.0227228	0.97277	0.974788	0.000416522	0.00124233
p__Proteobacteria	c__Alphaproteobacteria	o__Rhizobiales	f__Bradyrhizobiaceae	g__Bosea	s__genosp	138381		0.0310951	0.991459	0.991459	4.65783e-05	0.00175887
p__Proteobacteria	c__Alphaproteobacteria	o__Sphingomonadales	f__Sphingomonadaceae	g__Sphingomonas	s__	1108960		0.0669651	0.937567	0.945396	0.000929883	0.00216644
p__Proteobacteria	c__Gammaproteobacteria	o__Pseudomonadales	f__Moraxellaceae	g__Acinetobacter	s__lwoffii	1097359		0.124268	0.947733	0.951674	0.000300707	0.00041344
p__Actinobacteria	c__Actinobacteria	o__Actinomycetales	f__Microbacteriaceae	g__Salinibacterium	s__	876170		0.145928	0.933672	0.945396	0.000242389	0.000288552
p__Actinobacteria	c__Actinobacteria	o__Actinomycetales	f__Corynebacteriaceae	g__Corynebacterium	s__	441265		0.204302	0.864869	0.888791	0.00154457	0.0062059
p__Proteobacteria	c__Alphaproteobacteria	o__Rhizobiales	f__Methylobacteriaceae	g__	s__	615514		0.28578	0.890105	0.906296	7.78753e-05	0.00055818
p__Actinobacteria	c__Actinobacteria	o__Actinomycetales	f__Actinomycetaceae	g__Actinomyces	s__	1108638		0.297073	0.757084	0.803674	0.0010172	0.00149367
p__Bacteroidetes	c__Flavobacteriia	o__Flavobacteriales	f__Flavobacteriaceae	g__Capnocytophaga	s__	557100		0.343618	0.833038	0.865285	0.000754091	0.00116393
p__Firmicutes	c__Bacilli	o__Lactobacillales	f__Streptococcaceae	g__Streptococcus	s__	1082539		0.34394	0.584545	0.659662	0.00126274	0.00158934
p__Proteobacteria	c__Gammaproteobacteria	o__Pseudomonadales	f__Moraxellaceae	g__Moraxella	s__	1083037		0.35011	0.795527	0.834725	0.000381168	0.000506072
p__Proteobacteria	c__Gammaproteobacteria	o__Enterobacteriales	f__Enterobacteriaceae	g__Morganella	s__morganii	233981		0.355517	0.890836	0.906296	0.00021569	0.000189777
p__Firmicutes	c__Bacilli	o__Lactobacillales	f__Lactobacillaceae	g__Lactobacillus	s__	592160		0.449314	0.776846	0.81925	0.000299661	0.000383219
p__OD1	c__ZB2	o__	f__	g__	s__	650048		0.464415	0.694783	0.750738	5.23998e-05	0.000226268
p__Proteobacteria	c__Betaproteobacteria	o__Burkholderiales	f__Oxalobacteraceae	g__	s__	590601		0.482977	0.80846	0.845208	0.000150314	0.000525615
p__Proteobacteria	c__Alphaproteobacteria	o__Caulobacterales	f__	g__	s__	764838		0.530481	0.761299	0.806376	0.000103582	0.000290735
p__Verrucomicrobia	c__[Pedosphaerae]	o__[Pedosphaerales]	f__R4-41B	g__	s__	310462		0.576935	0.842887	0.869902	5.05613e-05	0.000517866
p__Proteobacteria	c__Alphaproteobacteria	o__Rhizobiales	f__Methylobacteriaceae	g__Methylobacterium	s__adhaesivum	591699		0.584983	0.721453	0.776084	0.00104166	0.000969851
p__Firmicutes	c__Bacilli	o__Lactobacillales	f__Enterococcaceae	g__Enterococcus	s__	1111582		0.665834	0.378282	0.469352	0.000287501	0.000760199
p__Proteobacteria	c__Gammaproteobacteria	o__Pseudomonadales	f__Moraxellaceae	g__Enhydrobacter	s__aerosaccus	990864		0.702828	0.492386	0.572608	0.000933863	0.00204157
p__Proteobacteria	c__Alphaproteobacteria	o__Sphingomonadales	f__	g__	s__	674655		0.767622	0.727951	0.779658	5.35636e-05	0.000286596
p__Proteobacteria	c__Epsilonproteobacteria	o__Campylobacterales	f__Campylobacteraceae	g__Campylobacter	s__	114621		0.872666	0.557942	0.63558	0.000168618	0.000136054
p__Actinobacteria	c__Actinobacteria	o__Actinomycetales	f__Micrococcaceae	g__Rothia	s__aeria	4297838		0.896289	0.63161	0.694915	0.000225764	0.00018153
p__Firmicutes	c__Bacilli	o__Bacillales	f__Bacillaceae	g__Bacillus	s__	1051517		1.00219	0.643998	0.703735	0.000204126	0.000320354
p__Proteobacteria	c__Betaproteobacteria	o__Burkholderiales	f__Comamonadaceae	g__Methylibium	s__	810167		1.01745	0.400175	0.486863	0.000276706	0.000147168
p__OD1	c__ZB2	o__	f__	g__	s__	4315529		1.04659	0.43216	0.517948	0.000138551	0.000180722
p__Proteobacteria	c__Betaproteobacteria	o__Burkholderiales	f__Comamonadaceae	g__	s__	831179		1.11166	0.437274	0.52278	0.000161438	0.000203488
p__Firmicutes	c__Clostridia	o__Clostridiales	f__Clostridiaceae	g__Clostridium	s__	1136403		1.14496	0.601837	0.672887	0.000210627	0.00100645
p__Proteobacteria	c__Alphaproteobacteria	o__Rhodobacterales	f__Rhodobacteraceae	g__Rhodobacter	s__	783224		1.17918	0.613305	0.680104	0.000106638	0.00047775
p__Firmicutes	c__Clostridia	o__Clostridiales	f__[Mogibacteriaceae]	g__	s__	14159		1.32595	0.422026	0.509597	0.000302635	0.000284577
p__Proteobacteria	c__Alphaproteobacteria	o__Rhodobacterales	f__Rhodobacteraceae	g__	s__	1108289		1.34827	0.487232	0.569814	0.000140646	0.000147113
p__Firmicutes	c__Clostridia	o__Clostridiales	f__Veillonellaceae	g__Selenomonas	s__	92263		1.42158	0.382708	0.471551	0.00089	0.000875825
p__Proteobacteria	c__Gammaproteobacteria	o__Pasteurellales	f__Pasteurellaceae	g__Actinobacillus	s__parahaemolyticus	4377624		1.47615	0.253665	0.348069	0.00021018	0.00011002
p__Firmicutes	c__Erysipelotrichi	o__Erysipelotrichales	f__Erysipelotrichaceae	g__Bulleidia	s__moorei	851938		1.52734	0.181833	0.266946	0.000786996	0.000604437
p__Bacteroidetes	c__Bacteroidia	o__Bacteroidales	f__Prevotellaceae	g__Prevotella	s__	760967		1.65316	0.529578	0.607568	0.000177421	0.000561468
p__Firmicutes	c__Clostridia	o__Clostridiales	f__[Tissierellaceae]	g__Finegoldia	s__	505587		1.68435	0.41801	0.506012	0.000612756	0.000349551
p__Firmicutes	c__Bacilli	o__Lactobacillales	f__Streptococcaceae	g__Streptococcus	s__	967427		1.74191	0.00224177	0.00630838	0.0146513	0.0166312
p__Proteobacteria	c__Gammaproteobacteria	o__Pasteurellales	f__Pasteurellaceae	g__Actinobacillus	s__parahaemolyticus	893979		1.84946	0.0520322	0.0997284	0.00597618	0.00241687
p__Firmicutes	c__Bacilli	o__Lactobacillales	f__Streptococcaceae	g__Streptococcus	s__	526131		1.85253	9.57116e-06	5.19424e-05	0.000182231	7.72533e-05
p__Bacteroidetes	c__Bacteroidia	o__Bacteroidales	f__Prevotellaceae	g__Prevotella	s__	851935		1.90993	0.51146	0.592411	0.000261232	3.31734e-05
p__Firmicutes	c__Clostridia	o__Clostridiales	f__Lachnospiraceae	g__Oribacterium	s__	4310395		1.96844	0.0687028	0.127629	0.000237658	5.62042e-05
p__Firmicutes	c__Clostridia	o__Clostridiales	f__[Mogibacteriaceae]	g__Mogibacterium	s__	531206		2.00191	0.146837	0.232532	0.00027875	0.000147771
p__Actinobacteria	c__Actinobacteria	o__Actinomycetales	f__Corynebacteriaceae	g__Corynebacterium	s__	446403		2.03378	0.191203	0.2765	0.00294947	0.00117061
p__Bacteroidetes	c__Flavobacteriia	o__Flavobacteriales	f__Cryomorphaceae	g__Fluviicola	s__	439462		2.08505	0.184985	0.270751	4.52241e-05	8.01373e-05
p__Firmicutes	c__Bacilli	o__Lactobacillales	f__Streptococcaceae	g__Streptococcus	s__	1083194		2.14938	3.13243e-06	1.86786e-05	0.0678793	0.0186713
p__Fusobacteria	c__Fusobacteriia	o__Fusobacteriales	f__Fusobacteriaceae	g__Fusobacterium	s__	545299		2.15308	0.00224646	0.00630838	0.000234084	0.000112585
p__Firmicutes	c__Bacilli	o__Lactobacillales	f__Carnobacteriaceae	g__Granulicatella	s__	1059729		2.23067	0.00438429	0.0116995	0.0030858	0.00134952
p__Firmicutes	c__Bacilli	o__Lactobacillales	f__Streptococcaceae	g__Streptococcus	s__	1088134		2.29028	0.000263994	0.000988444	0.000135961	4.82223e-05
p__Proteobacteria	c__Betaproteobacteria	o__Neisseriales	f__Neisseriaceae	g__	s__	1084952		2.3205	0.00194925	0.00563766	0.0335376	0.0127163
p__Firmicutes	c__Bacilli	o__Lactobacillales	f__Streptococcaceae	g__Streptococcus	s__	966820		2.36065	3.014e-05	0.000138644	8.50645e-05	2.71094e-05
p__Firmicutes	c__Clostridia	o__Clostridiales	f__Veillonellaceae	g__Schwartzia	s__	676367		2.39684	0.287944	0.384191	0.000297516	0.000126252
p__Proteobacteria	c__Betaproteobacteria	o__Neisseriales	f__Neisseriaceae	g__Neisseria	s__	4326647		2.41011	0.0010381	0.0032987	0.000124161	4.65892e-05
p__Firmicutes	c__Bacilli	o__Lactobacillales	f__Streptococcaceae	g__Streptococcus	s__	1040009		2.42105	0.000159477	0.00061622	6.66378e-05	2.68621e-05
p__Firmicutes	c__Bacilli	o__Lactobacillales	f__Lactobacillaceae	g__Lactobacillus	s__	586458		2.42458	3.72657e-08	3.29134e-07	0.000347404	8.47069e-05
p__Actinobacteria	c__Actinobacteria	o__Actinomycetales	f__Actinomycetaceae	g__Actinomyces	s__	641832		2.43136	0.0548134	0.104644	0.000167805	1.41728e-05
p__Proteobacteria	c__Deltaproteobacteria	o__	f__	g__	s__	3017521		2.45654	0.37898	0.469352	4.13264e-05	0.000419133
p__Firmicutes	c__Bacilli	o__Lactobacillales	f__Streptococcaceae	g__Streptococcus	s__	59566		2.46313	8.03438e-07	5.62407e-06	9.83408e-05	3.90887e-05
p__Firmicutes	c__Bacilli	o__Lactobacillales	f__Streptococcaceae	g__Streptococcus	s__	4317631		2.47165	1.09931e-06	7.47843e-06	0.000113753	4.76637e-05
p__Proteobacteria	c__Epsilonproteobacteria	o__Campylobacterales	f__Campylobacteraceae	g__Campylobacter	s__rectus	430191		2.4927	0.166699	0.2524	0.00182417	0.000636641
p__Firmicutes	c__Bacilli	o__Lactobacillales	f__Carnobacteriaceae	g__Granulicatella	s__	1027587		2.51618	0.0116446	0.0274358	0.0150097	0.00416646
p__Proteobacteria	c__Betaproteobacteria	o__Neisseriales	f__Neisseriaceae	g__Neisseria	s__	516198		2.51807	0.00244651	0.00679118	0.000601758	0.000358754
p__Actinobacteria	c__Actinobacteria	o__Actinomycetales	f__Mycobacteriaceae	g__Mycobacterium	s__	978664		2.52553	0.252167	0.347201	0.000110021	7.13421e-05
p__Proteobacteria	c__Gammaproteobacteria	o__Pasteurellales	f__Pasteurellaceae	g__Actinobacillus	s__	2647328		2.54774	0.0570339	0.108454	0.0021481	0.00106401
p__Bacteroidetes	c__Bacteroidia	o__Bacteroidales	f__Prevotellaceae	g__Prevotella	s__pallens	2222		2.55448	0.00139185	0.00428194	0.00041261	0.0001035
p__Firmicutes	c__Bacilli	o__Lactobacillales	f__Streptococcaceae	g__Streptococcus	s__	4445466		2.55527	4.05282e-07	2.96593e-06	0.0001512	4.4978e-05
p__Firmicutes	c__Bacilli	o__Lactobacillales	f__Streptococcaceae	g__Streptococcus	s__infantis	996434		2.595	7.52538e-08	6.16061e-07	0.000762247	5.98018e-05
p__Firmicutes	c__Clostridia	o__Clostridiales	f__Veillonellaceae	g__Veillonella	s__	915452		2.59892	0.299923	0.395799	8.0199e-05	1.03927e-05
p__Firmicutes	c__Bacilli	o__Lactobacillales	f__Streptococcaceae	g__Streptococcus	s__	579608		2.6055	3.72917e-05	0.000166777	0.0183657	0.0047673
p__Firmicutes	c__Bacilli	o__Lactobacillales	f__Streptococcaceae	g__Streptococcus	s__	863124		2.61047	3.74791e-08	3.29134e-07	0.000136492	4.75512e-05
p__Firmicutes	c__Clostridia	o__Clostridiales	f__Veillonellaceae	g__Veillonella	s__dispar	4455388		2.64997	1.51496e-06	9.75637e-06	0.000280271	2.88358e-05
p__Bacteroidetes	c__Bacteroidia	o__Bacteroidales	f__Prevotellaceae	g__Prevotella	s__melaninogenica	4307652		2.66431	0.000325756	0.00116548	0.0250975	0.00479187
p__Firmicutes	c__Bacilli	o__Lactobacillales	f__Streptococcaceae	g__Streptococcus	s__	931950		2.66477	7.26578e-06	4.03376e-05	8.14657e-05	1.95366e-05
p__Firmicutes	c__Bacilli	o__Lactobacillales	f__Streptococcaceae	g__Streptococcus	s__	4309301		2.66528	1.27429e-08	1.28225e-07	0.000258342	5.07407e-05
p__Bacteroidetes	c__Bacteroidia	o__Bacteroidales	f__Prevotellaceae	g__Prevotella	s__pallens	705241		2.67397	0.00630117	0.0160182	0.0237999	0.00563487
p__Bacteroidetes	c__Bacteroidia	o__Bacteroidales	f__[Paraprevotellaceae]	g__[Prevotella]	s__	4310396		2.68849	0.00864482	0.0210574	0.00678632	0.00210321
p__Bacteroidetes	c__Bacteroidia	o__Bacteroidales	f__Prevotellaceae	g__Prevotella	s__	515747		2.72608	0.0206784	0.0441932	0.00349658	0.000650213
p__Bacteroidetes	c__Bacteroidia	o__Bacteroidales	f__Prevotellaceae	g__Prevotella	s__melaninogenica	535359		2.72965	0.00023579	0.000896744	0.00208893	0.000666224
p__Firmicutes	c__Bacilli	o__Lactobacillales	f__Streptococcaceae	g__Streptococcus	s__	4332717		2.73853	3.85742e-08	3.29802e-07	0.00029923	6.51413e-05
p__Bacteroidetes	c__Bacteroidia	o__Bacteroidales	f__Prevotellaceae	g__Prevotella	s__	851822		2.74042	0.000324533	0.00116548	0.0233593	0.00630684
p__Proteobacteria	c__Gammaproteobacteria	o__Pasteurellales	f__Pasteurellaceae	g__Haemophilus	s__parainfluenzae	968675		2.74315	5.46341e-06	3.1045e-05	0.000161211	5.3776e-05
p__Proteobacteria	c__Betaproteobacteria	o__Neisseriales	f__Neisseriaceae	g__Neisseria	s__cinerea	470724		2.74349	0.0017187	0.00509282	0.000414726	0.000238039
p__Firmicutes	c__Bacilli	o__Gemellales	f__Gemellaceae	g__	s__	1074210		2.77522	0.000524372	0.00179625	0.00763753	0.0019226
p__Firmicutes	c__Bacilli	o__Bacillales	f__Planococcaceae	g__	s__	949789		2.80671	3.63322e-05	0.000165552	0.000559236	0.000181838
p__Proteobacteria	c__Betaproteobacteria	o__Neisseriales	f__Neisseriaceae	g__Neisseria	s__	4377731		2.82096	8.14763e-05	0.000336351	0.000114462	3.26679e-05
p__Firmicutes	c__Clostridia	o__Clostridiales	f__Veillonellaceae	g__Veillonella	s__parvula	518743		2.82555	1.24679e-06	8.24933e-06	0.000973452	0.000180201
p__Proteobacteria	c__Gammaproteobacteria	o__Pasteurellales	f__Pasteurellaceae	g__Actinobacillus	s__parahaemolyticus	4318122		2.85335	0.00514714	0.0135851	0.000101407	2.99105e-05
p__Bacteroidetes	c__Bacteroidia	o__Bacteroidales	f__Prevotellaceae	g__Prevotella	s__melaninogenica	4451252		2.86359	1.85013e-05	9.30848e-05	0.000111453	2.07857e-05
p__Firmicutes	c__Bacilli	o__Lactobacillales	f__Streptococcaceae	g__Streptococcus	s__	1078207		2.89286	1.22096e-12	2.34134e-11	0.000530446	0.000136765
p__Firmicutes	c__Bacilli	o__Lactobacillales	f__Streptococcaceae	g__Streptococcus	s__	989579		2.91096	1.75775e-07	1.36935e-06	0.00029006	7.4085e-05
p__Firmicutes	c__Bacilli	o__Lactobacillales	f__Streptococcaceae	g__Streptococcus	s__	4301566		2.91873	3.36974e-12	5.81281e-11	0.000322769	9.9687e-05
p__Actinobacteria	c__Actinobacteria	o__Actinomycetales	f__Actinomycetaceae	g__Actinomyces	s__	787709		2.92074	1.70074e-06	1.08086e-05	0.0076278	0.0021329
p__Actinobacteria	c__Actinobacteria	o__Actinomycetales	f__Micrococcaceae	g__Rothia	s__mucilaginosa	1017181		2.93649	1.12287e-05	5.83167e-05	0.0211687	0.0046804
p__Bacteroidetes	c__Bacteroidia	o__Bacteroidales	f__Prevotellaceae	g__Prevotella	s__	851923		2.94504	0.311659	0.406841	0.000174857	1.46683e-06
p__Bacteroidetes	c__Bacteroidia	o__Bacteroidales	f__Prevotellaceae	g__Prevotella	s__melaninogenica	4308270		2.95304	2.37663e-05	0.000113655	0.000591385	7.92033e-05
p__Firmicutes	c__Bacilli	o__Lactobacillales	f__Streptococcaceae	g__Streptococcus	s__	888300		2.96382	1.07958e-05	5.66781e-05	0.000251563	5.28041e-05
p__Bacteroidetes	c__Bacteroidia	o__Bacteroidales	f__Porphyromonadaceae	g__Porphyromonas	s__	530164		2.96995	0.0014606	0.00444176	0.00156721	0.000293717
p__Bacteroidetes	c__Bacteroidia	o__Bacteroidales	f__Prevotellaceae	g__Prevotella	s__	530206		3.01136	2.25321e-05	0.000109871	0.0151394	0.00498454
p__Firmicutes	c__Bacilli	o__Lactobacillales	f__Carnobacteriaceae	g__Granulicatella	s__	993647		3.01302	4.70248e-09	5.04733e-08	0.000129265	2.94327e-05
p__Proteobacteria	c__Gammaproteobacteria	o__Pasteurellales	f__Pasteurellaceae	g__Actinobacillus	s__parahaemolyticus	971907		3.03033	2.20893e-07	1.69351e-06	0.00068383	0.000149547
p__Bacteroidetes	c__Bacteroidia	o__Bacteroidales	f__Porphyromonadaceae	g__Porphyromonas	s__endodontalis	1938		3.08208	0.00993272	0.0238682	0.0022219	0.000629801
p__Firmicutes	c__Clostridia	o__Clostridiales	f__Lachnospiraceae	g__	s__	71649		3.09219	0.101477	0.170186	0.000455127	0.00010439
p__Bacteroidetes	c__Bacteroidia	o__Bacteroidales	f__Prevotellaceae	g__Prevotella	s__	146094		3.10002	0.0407415	0.0806481	0.0027655	0.000485219
p__Firmicutes	c__Bacilli	o__Lactobacillales	f__Streptococcaceae	g__Streptococcus	s__	529233		3.10435	2.07638e-10	2.63919e-09	0.000170378	3.71488e-05
p__Proteobacteria	c__Gammaproteobacteria	o__Pasteurellales	f__Pasteurellaceae	g__	s__	579924		3.11705	0.0007094	0.00234685	0.00129244	1.1549e-05
p__Bacteroidetes	c__Bacteroidia	o__Bacteroidales	f__Prevotellaceae	g__Prevotella	s__melaninogenica	521268		3.12161	1.01437e-05	5.44377e-05	0.000480244	7.77162e-05
p__Proteobacteria	c__Betaproteobacteria	o__Neisseriales	f__Neisseriaceae	g__	s__	942534		3.13748	1.59915e-05	8.1304e-05	6.40707e-05	8.63118e-06
p__Proteobacteria	c__Gammaproteobacteria	o__Pasteurellales	f__Pasteurellaceae	g__Haemophilus	s__	4305793		3.13854	3.45768e-08	3.15105e-07	9.50046e-05	2.64992e-05
p__Actinobacteria	c__Coriobacteriia	o__Coriobacteriales	f__Coriobacteriaceae	g__Atopobium	s__	4451251		3.14024	0.00198728	0.00571344	0.00294559	0.00147823
p__Fusobacteria	c__Fusobacteriia	o__Fusobacteriales	f__Fusobacteriaceae	g__Fusobacterium	s__	938948		3.18858	2.89442e-06	1.74751e-05	0.0179479	0.00408849
p__Proteobacteria	c__Gammaproteobacteria	o__Pasteurellales	f__Pasteurellaceae	g__Haemophilus	s__	153997		3.21284	1.59336e-08	1.53919e-07	0.000106003	2.32812e-05
p__Actinobacteria	c__Actinobacteria	o__Actinomycetales	f__Actinomycetaceae	g__Actinomyces	s__	510422		3.23317	0.000300885	0.00111161	0.00408355	0.000960916
p__Firmicutes	c__Clostridia	o__Clostridiales	f__Lachnospiraceae	g__Catonella	s__	122517		3.23348	0.0299714	0.0626675	0.000603442	9.59624e-05
p__Firmicutes	c__Clostridia	o__Clostridiales	f__Veillonellaceae	g__Veillonella	s__parvula	114821		3.23882	1.5582e-07	1.23378e-06	0.000117605	1.74926e-05
p__Firmicutes	c__Clostridia	o__Clostridiales	f__Clostridiaceae	g__	s__	527630		3.26049	0.0332176	0.0682727	0.00110698	0.000428454
p__Firmicutes	c__Bacilli	o__Lactobacillales	f__Streptococcaceae	g__Streptococcus	s__	4303294		3.2709	1.39235e-10	1.81758e-09	0.000207474	3.67859e-05
p__Bacteroidetes	c__Bacteroidia	o__Bacteroidales	f__Prevotellaceae	g__Prevotella	s__	41911		3.27182	0.175465	0.261572	0.000220781	0
p__Actinobacteria	c__Actinobacteria	o__Actinomycetales	f__Corynebacteriaceae	g__Corynebacterium	s__	1080820		3.27812	0.137237	0.220951	0.000866323	0.000235404
p__Actinobacteria	c__Actinobacteria	o__Bifidobacteriales	f__Bifidobacteriaceae	g__Bifidobacterium	s__	553611		3.29784	0.0748107	0.137914	0.000147423	3.74953e-06
p__Bacteroidetes	c__Bacteroidia	o__Bacteroidales	f__Porphyromonadaceae	g__Porphyromonas	s__	495451		3.3633	0.161216	0.247986	0.000107866	0
p__Firmicutes	c__Clostridia	o__Clostridiales	f__Veillonellaceae	g__Veillonella	s__	585419		3.37701	1.38534e-10	1.81758e-09	0.11481	0.0181932
p__Firmicutes	c__Clostridia	o__Clostridiales	f__Veillonellaceae	g__Megasphaera	s__	41128		3.38426	0.156709	0.242597	0.000160209	0
p__Fusobacteria	c__Fusobacteriia	o__Fusobacteriales	f__Leptotrichiaceae	g__Leptotrichia	s__	4307303		3.38755	0.0479457	0.0930031	0.000202448	1.93497e-05
p__Proteobacteria	c__Betaproteobacteria	o__Neisseriales	f__Neisseriaceae	g__	s__	900973		3.39614	0.156202	0.24259	0.00095769	0.000153941
p__Firmicutes	c__Bacilli	o__Lactobacillales	f__Streptococcaceae	g__Streptococcus	s__	968954		3.40625	5.07155e-10	5.97454e-09	0.0246608	0.00429803
p__Bacteroidetes	c__Bacteroidia	o__Bacteroidales	f__Prevotellaceae	g__Prevotella	s__melaninogenica	4307391		3.40998	1.07409e-05	5.66781e-05	0.0587418	0.00951547
p__Firmicutes	c__Clostridia	o__Clostridiales	f__Veillonellaceae	g__Veillonella	s__	511378		3.45797	2.26012e-05	0.000109871	0.01645	0.00356367
p__Proteobacteria	c__Gammaproteobacteria	o__Pasteurellales	f__Pasteurellaceae	g__	s__	1086274		3.49914	4.0882e-12	6.80896e-11	0.000497878	0.000204968
p__Bacteroidetes	c__Bacteroidia	o__Bacteroidales	f__Prevotellaceae	g__Prevotella	s__	561036		3.55096	0.222208	0.31474	9.67599e-05	5.96212e-05
p__Actinobacteria	c__Actinobacteria	o__Actinomycetales	f__Micrococcaceae	g__Rothia	s__mucilaginosa	4294457		3.57184	4.38631e-05	0.000192599	0.000180505	2.1431e-05
p__Bacteroidetes	c__Bacteroidia	o__Bacteroidales	f__Prevotellaceae	g__Prevotella	s__	73324		3.58079	0.00559522	0.0144518	0.00308468	0.000566419
p__Firmicutes	c__Clostridia	o__Clostridiales	f__Veillonellaceae	g__Dialister	s__	1105876		3.5878	0.0949946	0.162704	5.69091e-05	0
p__Actinobacteria	c__Actinobacteria	o__Actinomycetales	f__	g__	s__	12297		3.63784	0.0388054	0.078124	0.000366218	0.000176156
p__Bacteroidetes	c__Bacteroidia	o__Bacteroidales	f__Prevotellaceae	g__Prevotella	s__melaninogenica	1066621		3.6488	6.07833e-10	6.82752e-09	0.00371597	0.00107311
p__Fusobacteria	c__Fusobacteriia	o__Fusobacteriales	f__Leptotrichiaceae	g__Leptotrichia	s__	1927234		3.66559	0.00233854	0.00652899	0.00329179	0.000684164
p__Bacteroidetes	c__Bacteroidia	o__Bacteroidales	f__Prevotellaceae	g__Prevotella	s__copri	4404224		3.67637	1.00101e-08	1.0287e-07	0.000100806	1.36489e-05
p__Firmicutes	c__Clostridia	o__Clostridiales	f__Veillonellaceae	g__Veillonella	s__dispar	4422456		3.68417	0.000461111	0.00160228	0.000597219	0.000187248
p__Actinobacteria	c__Actinobacteria	o__Actinomycetales	f__Corynebacteriaceae	g__Corynebacterium	s__	128390		3.68556	0.179512	0.265151	0.000271545	6.8747e-05
p__Bacteroidetes	c__Bacteroidia	o__Bacteroidales	f__Prevotellaceae	g__Prevotella	s__nigrescens	2195		3.69192	0.00867581	0.0210574	0.00316103	0.00068402
p__Firmicutes	c__Bacilli	o__Lactobacillales	f__Streptococcaceae	g__Streptococcus	s__	4325275		3.70515	5.94059e-10	6.82752e-09	0.000202626	1.79284e-05
p__Firmicutes	c__Clostridia	o__Clostridiales	f__Veillonellaceae	g__Veillonella	s__dispar	4478358		3.72883	1.69588e-14	4.55062e-13	0.000134499	1.50048e-05
p__Firmicutes	c__Clostridia	o__Clostridiales	f__Veillonellaceae	g__Veillonella	s__dispar	4459750		3.74665	6.22447e-14	1.50321e-12	9.39797e-05	1.17943e-05
p__Firmicutes	c__Clostridia	o__Clostridiales	f__Veillonellaceae	g__Selenomonas	s__	502919		3.77867	0.0646551	0.120678	0.000400911	1.18806e-05
p__Proteobacteria	c__Gammaproteobacteria	o__Pasteurellales	f__Pasteurellaceae	g__Aggregatibacter	s__	897109		3.80838	9.25199e-12	1.39647e-10	0.000378607	0.000105599
p__Firmicutes	c__Bacilli	o__Lactobacillales	f__Streptococcaceae	g__Streptococcus	s__	1068499		3.81023	1.49236e-16	4.50507e-15	0.000761145	0.000264143
p__Firmicutes	c__Bacilli	o__Lactobacillales	f__Streptococcaceae	g__Streptococcus	s__	593803		3.81232	6.74413e-12	1.05078e-10	0.000109641	2.94231e-05
p__Bacteroidetes	c__Bacteroidia	o__Bacteroidales	f__Prevotellaceae	g__Prevotella	s__melaninogenica	1042479		3.81558	7.71461e-09	8.10035e-08	6.26984e-05	5.89187e-06
p__Bacteroidetes	c__Bacteroidia	o__Bacteroidales	f__[Paraprevotellaceae]	g__[Prevotella]	s__	93000		3.84016	0.000314178	0.00114961	0.00206452	0.000284267
p__Firmicutes	c__Clostridia	o__Clostridiales	f__Veillonellaceae	g__Veillonella	s__dispar	3569942		3.92549	1.84355e-13	4.24016e-12	0.000174826	2.44391e-05
p__Actinobacteria	c__Actinobacteria	o__Actinomycetales	f__Actinomycetaceae	g__Actinomyces	s__	960871		3.92583	2.57523e-05	0.000120761	0.00139919	0.000142591
p__Firmicutes	c__Clostridia	o__Clostridiales	f__Veillonellaceae	g__Veillonella	s__	561537		3.92924	0.000143897	0.000561882	0.00851059	0.00107632
p__Firmicutes	c__Clostridia	o__Clostridiales	f__Veillonellaceae	g__Veillonella	s__dispar	3864823		3.94232	6.03809e-16	1.71553e-14	0.000103509	9.21913e-06
p__Fusobacteria	c__Fusobacteriia	o__Fusobacteriales	f__Leptotrichiaceae	g__Leptotrichia	s__	92131		3.9432	2.26453e-06	1.39694e-05	0.000106921	1.60422e-05
p__Firmicutes	c__Clostridia	o__Clostridiales	f__Veillonellaceae	g__Veillonella	s__dispar	4340138		4.00765	5.58073e-17	1.797e-15	0.000915206	7.96532e-05
p__Firmicutes	c__Clostridia	o__Clostridiales	f__Veillonellaceae	g__Veillonella	s__dispar	4388775		4.01733	1.00203e-20	4.39984e-19	0.000310478	4.67016e-05
p__Firmicutes	c__Clostridia	o__Clostridiales	f__Veillonellaceae	g__Veillonella	s__dispar	757622		4.02646	1.61821e-18	6.01228e-17	0.00068513	8.48359e-05
p__Tenericutes	c__Mollicutes	o__Mycoplasmatales	f__Mycoplasmataceae	g__Mycoplasma	s__	573950		4.04457	0.0929957	0.162008	6.08072e-05	1.55003e-05
p__Tenericutes	c__Mollicutes	o__Mycoplasmatales	f__Mycoplasmataceae	g__Mycoplasma	s__	594001		4.04643	0.0165881	0.0374395	8.25022e-05	4.55892e-07
p__Bacteroidetes	c__Bacteroidia	o__Bacteroidales	f__Prevotellaceae	g__Prevotella	s__melaninogenica	4306852		4.06711	1.26035e-12	2.34134e-11	0.00031434	4.23373e-05
p__Bacteroidetes	c__Flavobacteriia	o__Flavobacteriales	f__[Weeksellaceae]	g__	s__	4298633		4.07221	0.00713773	0.0175894	0.000597434	0.000135921
p__Bacteroidetes	c__Bacteroidia	o__Bacteroidales	f__Prevotellaceae	g__Prevotella	s__	1060441		4.08344	0.036707	0.0744936	0.000520595	0.000218677
p__Firmicutes	c__Clostridia	o__Clostridiales	f__Veillonellaceae	g__Veillonella	s__dispar	4318671		4.08985	2.37321e-19	9.55216e-18	0.000280502	3.60952e-05
p__Proteobacteria	c__Gammaproteobacteria	o__Pasteurellales	f__Pasteurellaceae	g__Haemophilus	s__parainfluenzae	865469		4.10221	2.68369e-13	5.63574e-12	0.0321682	0.00872058
p__Firmicutes	c__Bacilli	o__Lactobacillales	f__Streptococcaceae	g__Streptococcus	s__anginosus	217734		4.11272	0.00175207	0.00516007	0.000666022	4.26699e-05
p__Bacteroidetes	c__Flavobacteriia	o__Flavobacteriales	f__Flavobacteriaceae	g__Capnocytophaga	s__ochracea	987790		4.15326	0.000557562	0.0018965	0.00219381	0.000188145
p__Firmicutes	c__Bacilli	o__Lactobacillales	f__Streptococcaceae	g__Streptococcus	s__	516611		4.15605	4.32862e-10	5.22681e-09	0.000282089	1.36078e-05
p__Proteobacteria	c__Betaproteobacteria	o__Neisseriales	f__Neisseriaceae	g__	s__	761024		4.24134	3.71563e-05	0.000166777	0.000386612	1.50554e-05
p__Firmicutes	c__Clostridia	o__Clostridiales	f__Veillonellaceae	g__Veillonella	s__parvula	3889756		4.24864	8.14512e-08	6.55682e-07	0.000705736	0.000163973
p__Firmicutes	c__Clostridia	o__Clostridiales	f__Veillonellaceae	g__Veillonella	s__dispar	342427		4.2904	3.33657e-14	8.48191e-13	0.014029	0.00175533
p__Firmicutes	c__Bacilli	o__Lactobacillales	f__Streptococcaceae	g__Streptococcus	s__	4455767		4.29211	2.03269e-08	1.88805e-07	0.000182709	5.56341e-05
p__Actinobacteria	c__Actinobacteria	o__Actinomycetales	f__Actinomycetaceae	g__Actinomyces	s__	526682		4.33611	2.20412e-12	3.94292e-11	0.000308441	6.73287e-05
p__Firmicutes	c__Clostridia	o__Clostridiales	f__Lachnospiraceae	g__	s__	922397		4.34555	9.84681e-05	0.000403052	0.00107477	0.000121446
p__Firmicutes	c__Clostridia	o__Clostridiales	f__Veillonellaceae	g__Dialister	s__	535901		4.4266	0.00338514	0.00908346	0.000296211	0.000172386
p__Fusobacteria	c__Fusobacteriia	o__Fusobacteriales	f__Leptotrichiaceae	g__Leptotrichia	s__	1042850		4.44074	2.15582e-05	0.000107347	0.00973344	0.00129834
p__Bacteroidetes	c__Bacteroidia	o__Bacteroidales	f__Prevotellaceae	g__Prevotella	s__melaninogenica	4447248		4.44213	8.61839e-11	1.18934e-09	0.000142043	1.23528e-05
p__Proteobacteria	c__Betaproteobacteria	o__Neisseriales	f__Neisseriaceae	g__Kingella	s__	1020605		4.44277	0.000127581	0.00050927	0.00119742	0.000123363
p__Bacteroidetes	c__Bacteroidia	o__Bacteroidales	f__Prevotellaceae	g__Prevotella	s__	92629		4.4764	0.0392574	0.0783525	0.000265413	8.03939e-05
p__Proteobacteria	c__Gammaproteobacteria	o__Pasteurellales	f__Pasteurellaceae	g__Aggregatibacter	s__segnis	92231		4.50254	0.00265007	0.00727264	0.000755023	0.00105427
p__Actinobacteria	c__Coriobacteriia	o__Coriobacteriales	f__Coriobacteriaceae	g__Atopobium	s__	524725		4.51336	1.18775e-05	6.10301e-05	0.000110595	8.08515e-06
p__Firmicutes	c__Clostridia	o__Clostridiales	f__Veillonellaceae	g__Veillonella	s__dispar	4359220		4.51718	3.71213e-23	1.79296e-21	0.000280776	2.49003e-05
p__Bacteroidetes	c__Bacteroidia	o__Bacteroidales	f__Prevotellaceae	g__Prevotella	s__	4307006		4.53015	0.0935109	0.162008	0.00056887	7.31893e-05
p__Bacteroidetes	c__Bacteroidia	o__Bacteroidales	f__Prevotellaceae	g__Prevotella	s__	114813		4.56586	0.11621	0.192224	0.000647612	0.000209084
p__Firmicutes	c__Clostridia	o__Clostridiales	f__Lachnospiraceae	g__Oribacterium	s__	749837		4.59542	9.39787e-06	5.15815e-05	0.0046824	0.000566718
p__Bacteroidetes	c__Bacteroidia	o__Bacteroidales	f__Prevotellaceae	g__Prevotella	s__melaninogenica	4298291		4.60997	4.60716e-11	6.54488e-10	0.000156811	1.15691e-05
p__Bacteroidetes	c__Bacteroidia	o__Bacteroidales	f__[Paraprevotellaceae]	g__[Prevotella]	s__tannerae	2714267		4.64023	0.000410448	0.00144706	0.00412484	0.000339119
p__Proteobacteria	c__Gammaproteobacteria	o__Pasteurellales	f__Pasteurellaceae	g__	s__	579141		4.69943	0.0123263	0.0287614	0.00137582	2.06121e-05
p__Fusobacteria	c__Fusobacteriia	o__Fusobacteriales	f__Leptotrichiaceae	g__Leptotrichia	s__	904227		4.73264	0.00570344	0.014653	0.000164935	8.77187e-05
p__Actinobacteria	c__Actinobacteria	o__Bifidobacteriales	f__Bifidobacteriaceae	g__Bifidobacterium	s__longum	559527		4.74833	0.00125346	0.00388091	0.00168384	0.000139745
p__Bacteroidetes	c__Bacteroidia	o__Bacteroidales	f__Prevotellaceae	g__Prevotella	s__	1004910		4.77051	9.53944e-07	6.58221e-06	0.00372774	0.000764337
p__Bacteroidetes	c__Bacteroidia	o__Bacteroidales	f__Prevotellaceae	g__Prevotella	s__	1033687		4.77651	1.16024e-12	2.33498e-11	0.000488763	3.86369e-05
p__Synergistetes	c__Synergistia	o__Synergistales	f__Dethiosulfovibrionaceae	g__TG5	s__	754684		4.83393	0.0284621	0.0600314	0.000505254	0.000799883
p__Proteobacteria	c__Betaproteobacteria	o__Burkholderiales	f__Burkholderiaceae	g__Lautropia	s__	1084417		4.84365	0.00940729	0.0227186	0.000251032	9.80464e-05
p__Bacteroidetes	c__Bacteroidia	o__Bacteroidales	f__Porphyromonadaceae	g__Tannerella	s__	4443201		4.86828	0.0939179	0.162008	0.000605457	0.000144218
p__Proteobacteria	c__Gammaproteobacteria	o__Pasteurellales	f__Pasteurellaceae	g__Haemophilus	s__	316852		4.86963	3.11677e-11	4.56182e-10	0.000184922	7.45165e-07
p__Firmicutes	c__Bacilli	o__Gemellales	f__Gemellaceae	g__	s__	925707		4.8918	1.15384e-06	7.74035e-06	0.000143103	1.51954e-06
p__Bacteroidetes	c__Bacteroidia	o__Bacteroidales	f__Prevotellaceae	g__Prevotella	s__nanceiensis	999477		4.89512	0.000716487	0.00235417	0.000135227	7.31893e-07
p__Firmicutes	c__Clostridia	o__Clostridiales	f__[Tissierellaceae]	g__Parvimonas	s__	1866742		4.93857	0.00287392	0.00781938	0.000717269	0.000176809
p__SR1	c__	o__	f__	g__	s__	4400869		4.97256	0.0430115	0.0841075	0.00170278	0.000454306
p__Bacteroidetes	c__Bacteroidia	o__Bacteroidales	f__Prevotellaceae	g__Prevotella	s__melaninogenica	935742		4.98395	6.44655e-12	1.03789e-10	0.0759944	0.00773961
p__Bacteroidetes	c__Bacteroidia	o__Bacteroidales	f__Porphyromonadaceae	g__Porphyromonas	s__	2613485		5.01761	0.0168606	0.0378775	0.0017879	0.000244135
p__Firmicutes	c__Bacilli	o__Lactobacillales	f__Streptococcaceae	g__Streptococcus	s__	4297222		5.02677	0.00458222	0.0121605	0.000319694	0.00012325
p__Fusobacteria	c__Fusobacteriia	o__Fusobacteriales	f__Leptotrichiaceae	g__	s__	42256		5.0494	0.0822935	0.147214	0.000310967	0
p__Fusobacteria	c__Fusobacteriia	o__Fusobacteriales	f__Leptotrichiaceae	g__Leptotrichia	s__	4306055		5.10577	0.00687216	0.0170711	0.000846317	0.000200141
p__Firmicutes	c__Clostridia	o__Clostridiales	f__Lachnospiraceae	g__Moryella	s__	714766		5.15324	1.49005e-06	9.7256e-06	0.00193363	0.00012338
p__Actinobacteria	c__Actinobacteria	o__Bifidobacteriales	f__Bifidobacteriaceae	g__Alloscardovia	s__	1136387		5.16577	0.00554951	0.0144326	0.00171573	0.000252433
p__TM7	c__TM7-3	o__	f__	g__	s__	4016971		5.23691	2.28485e-06	1.39694e-05	0.000256322	7.33871e-06
p__Proteobacteria	c__Gammaproteobacteria	o__Pasteurellales	f__Pasteurellaceae	g__Haemophilus	s__	341460		5.2838	1.20404e-25	6.46168e-24	0.000316961	1.18399e-05
p__Actinobacteria	c__Actinobacteria	o__Actinomycetales	f__Actinomycetaceae	g__Actinomyces	s__	875735		5.30265	3.28251e-07	2.43916e-06	0.00249492	0.000247101
p__Firmicutes	c__Clostridia	o__Clostridiales	f__	g__	s__	4329788		5.35429	8.07568e-05	0.000336255	0.00104173	0.000153036
p__Bacteroidetes	c__Bacteroidia	o__Bacteroidales	f__Prevotellaceae	g__Prevotella	s__	557665		5.36729	0.00689207	0.0170711	0.00125063	0.00014395
p__SR1	c__	o__	f__	g__	s__	4330849		5.37583	0.0484603	0.0936253	0.00152035	9.68321e-05
p__Bacteroidetes	c__Flavobacteriia	o__Flavobacteriales	f__Flavobacteriaceae	g__Capnocytophaga	s__	4338511		5.4571	0.000808597	0.00262116	0.000727923	8.46221e-05
p__Fusobacteria	c__Fusobacteriia	o__Fusobacteriales	f__Leptotrichiaceae	g__Leptotrichia	s__	4440191		5.521	0.000675281	0.00224938	0.00108077	0.000290085
p__Fusobacteria	c__Fusobacteriia	o__Fusobacteriales	f__Leptotrichiaceae	g__Leptotrichia	s__	923032		5.57795	0.0223002	0.0474494	0.000384544	0
p__Bacteroidetes	c__Bacteroidia	o__Bacteroidales	f__Porphyromonadaceae	g__Tannerella	s__	4406621		5.60242	7.35821e-05	0.000311756	0.000600653	2.7495e-05
p__Spirochaetes	c__Spirochaetes	o__Spirochaetales	f__Spirochaetaceae	g__Treponema	s__socranskii	74330		5.62206	0.000582967	0.00196904	0.000251697	7.29427e-06
p__Bacteroidetes	c__Bacteroidia	o__Bacteroidales	f__Porphyromonadaceae	g__Paludibacter	s__	4305935		5.69429	0.00625771	0.0159919	0.000311578	9.11783e-07
p__Firmicutes	c__Bacilli	o__Lactobacillales	f__Lactobacillaceae	g__Lactobacillus	s__	703741		5.7209	0.00169299	0.00504762	0.00323719	4.45282e-05
p__Firmicutes	c__Clostridia	o__Clostridiales	f__[Tissierellaceae]	g__Parvimonas	s__	851704		5.76973	1.32362e-08	1.30471e-07	0.000499366	0.00037901
p__Bacteroidetes	c__Bacteroidia	o__Bacteroidales	f__Prevotellaceae	g__Prevotella	s__	239506		5.79278	0.000795949	0.00259759	0.00146423	0.000355418
p__Proteobacteria	c__Epsilonproteobacteria	o__Campylobacterales	f__Campylobacteraceae	g__Campylobacter	s__	32546		5.82701	0.0101641	0.0243032	0.000981407	1.80931e-06
p__Bacteroidetes	c__Bacteroidia	o__Bacteroidales	f__[Paraprevotellaceae]	g__[Prevotella]	s__	269907		5.86739	0.000133595	0.000528905	0.00151617	0.000303027
p__Firmicutes	c__Clostridia	o__Clostridiales	f__Veillonellaceae	g__Dialister	s__	403701		5.91235	4.74735e-06	2.72973e-05	0.00118272	0.00027295
p__Firmicutes	c__Clostridia	o__Clostridiales	f__Veillonellaceae	g__Veillonella	s__	4440670		6.17221	0.00658377	0.0165623	0.00324443	0.000278465
p__Fusobacteria	c__Fusobacteriia	o__Fusobacteriales	f__Leptotrichiaceae	g__Leptotrichia	s__	714461		6.18264	2.16065e-06	1.35531e-05	0.000644659	1.23779e-05
p__Firmicutes	c__Bacilli	o__Lactobacillales	f__Lactobacillaceae	g__Lactobacillus	s__	288521		6.18859	0.00295443	0.007972	0.000439136	4.82647e-05
p__Proteobacteria	c__Epsilonproteobacteria	o__Campylobacterales	f__Campylobacteraceae	g__Campylobacter	s__	300432		6.45208	2.52802e-13	5.55016e-12	0.00332042	7.93953e-05
p__Bacteroidetes	c__Bacteroidia	o__Bacteroidales	f__Prevotellaceae	g__Prevotella	s__nanceiensis	898309		7.08704	7.98618e-07	5.62407e-06	0.00561128	0.000135944
p__Bacteroidetes	c__Bacteroidia	o__Bacteroidales	f__Prevotellaceae	g__Prevotella	s__	851961		7.72375	4.25419e-09	4.66994e-08	0.00138094	0.000672447
p__Bacteroidetes	c__Bacteroidia	o__Bacteroidales	f__[Paraprevotellaceae]	g__[Prevotella]	s__	2469654		7.96135	2.98843e-10	3.70106e-09	0.00730137	0.000374559
p__Proteobacteria	c__Gammaproteobacteria	o__Pasteurellales	f__Pasteurellaceae	g__Aggregatibacter	s__	862115		10.6418	1.62782e-08	1.54164e-07	0.00141021	0.000261387
p__Bacteroidetes	c__Bacteroidia	o__Bacteroidales	f__Prevotellaceae	g__Prevotella	s__	543032		10.8541	5.03946e-07	3.63293e-06	0.00148348	1.46683e-06
p__Bacteroidetes	c__Bacteroidia	o__Bacteroidales	f__Prevotellaceae	g__Prevotella	s__	70671		11.5617	1.48944e-17	5.13856e-16	0.00193307	4.55892e-07
p__Spirochaetes	c__Spirochaetes	o__Spirochaetales	f__Spirochaetaceae	g__Treponema	s__	669126		23.7666	3.94912e-45	3.99873e-43	0.000459657	0.000371498
p__Firmicutes	c__Clostridia	o__Clostridiales	f__Lachnospiraceae	g__Butyrivibrio	s__	92512		24.1528	3.84603e-45	3.99873e-43	0.00214582	0
p__Firmicutes	c__Clostridia	o__Clostridiales	f__Lachnospiraceae	g__	s__	537098		24.2309	4.80545e-26	2.90129e-24	0.000496318	6.03573e-05
p__Firmicutes	c__Clostridia	o__Clostridiales	f__Veillonellaceae	g__Megasphaera	s__	4375664		24.3785	2.24791e-35	1.55105e-33	0.000664739	9.29504e-05
p__Spirochaetes	c__Spirochaetes	o__Spirochaetales	f__Spirochaetaceae	g__Treponema	s__	71146		24.4889	8.79998e-56	2.1252e-53	0.000778855	0
p__Bacteroidetes	c__Flavobacteriia	o__Flavobacteriales	f__Flavobacteriaceae	g__Capnocytophaga	s__	664697		24.5042	6.85725e-64	3.31205e-61	0.000801908	0
p__Firmicutes	c__Clostridia	o__Clostridiales	f__	g__	s__	4432435		24.5151	4.13947e-45	3.99873e-43	0.000705728	0
p__Fusobacteria	c__Fusobacteriia	o__Fusobacteriales	f__Leptotrichiaceae	g__Leptotrichia	s__	31235		24.7051	2.00022e-40	1.61018e-38	0.00078937	0

## Sheet: Table 7 16s Recist
Phylum	Class	Order	Family	Genus	Specie	OTU#		logFC	pvalue	adj.P.Val	abundance.progression9	abundance.regression9
OTU enriched in Disease Regression
p__Cyanobacteria	c__Chloroplast	o__Streptophyta	f__	g__	s__	153978		-12.6117	0.0185534	0.0556602	0.00133081	0.135429
OTU enriched in Disease Progression
p__Proteobacteria	c__Gammaproteobacteria	o__Pasteurellales	f__Pasteurellaceae	g__Haemophilus	s__parainfluenzae	968675		4.55402	0.114516	0.23721	0.000151305	0
p__Firmicutes	c__Clostridia	o__Clostridiales	f__Veillonellaceae	g__Veillonella	s__dispar	3569942		4.8549	0.105189	0.221883	7.65683e-05	0
p__Firmicutes	c__Bacilli	o__Lactobacillales	f__Streptococcaceae	g__Streptococcus	s__	863124		4.88798	0.0543475	0.132197	8.91898e-05	0
p__Firmicutes	c__Bacilli	o__Lactobacillales	f__Streptococcaceae	g__Streptococcus	s__	579608		4.93167	0.0625871	0.149544	0.0077765	0.0027459
p__Bacteroidetes	c__Bacteroidia	o__Bacteroidales	f__Prevotellaceae	g__Prevotella	s__melaninogenica	4307652		5.15072	0.0450671	0.114461	0.0214132	0.00217032
p__Firmicutes	c__Bacilli	o__Lactobacillales	f__Streptococcaceae	g__Streptococcus	s__	1083194		5.16125	0.00370722	0.0137116	0.0177701	0.00909467
p__Firmicutes	c__Bacilli	o__Lactobacillales	f__Streptococcaceae	g__Streptococcus	s__	989579		5.24182	0.0430976	0.111888	4.40855e-05	0
p__Firmicutes	c__Bacilli	o__Lactobacillales	f__Streptococcaceae	g__Streptococcus	s__	516611		5.28379	0.113978	0.23721	5.59281e-06	0
p__Bacteroidetes	c__Bacteroidia	o__Bacteroidales	f__Prevotellaceae	g__Prevotella	s__melaninogenica	4306852		5.36923	0.0847079	0.185392	0	0
p__Firmicutes	c__Bacilli	o__Lactobacillales	f__Streptococcaceae	g__Streptococcus	s__	529233		5.3921	0.0409103	0.107241	4.34208e-05	0
p__Firmicutes	c__Bacilli	o__Lactobacillales	f__Streptococcaceae	g__Streptococcus	s__	526131		5.4204	0.0176003	0.0540008	9.71338e-05	0
p__Proteobacteria	c__Betaproteobacteria	o__Burkholderiales	f__Comamonadaceae	g__Acidovorax	s__	931643		5.45817	0.116909	0.237334	0.0001092	0
p__Firmicutes	c__Clostridia	o__Clostridiales	f__Veillonellaceae	g__Veillonella	s__dispar	4388775		5.53821	0.036127	0.096577	0.000109185	0
p__Firmicutes	c__Clostridia	o__Clostridiales	f__Veillonellaceae	g__Veillonella	s__dispar	4318671		5.6045	0.0379516	0.10046	9.47622e-05	0
p__Proteobacteria	c__Gammaproteobacteria	o__Pasteurellales	f__Pasteurellaceae	g__Aggregatibacter	s__	897109		5.61987	0.0640598	0.151721	0.000459784	0
p__Actinobacteria	c__Actinobacteria	o__Actinomycetales	f__Actinomycetaceae	g__Actinomyces	s__	526682		5.64615	0.0870961	0.186635	0.000328102	0
p__Proteobacteria	c__Gammaproteobacteria	o__Pasteurellales	f__Pasteurellaceae	g__Haemophilus	s__	341460		5.68315	0.0749526	0.168748	2.88447e-05	0
p__Firmicutes	c__Clostridia	o__Clostridiales	f__Veillonellaceae	g__Veillonella	s__dispar	4359220		5.71598	0.0344022	0.0938243	7.02905e-05	0
p__Proteobacteria	c__Betaproteobacteria	o__Burkholderiales	f__Comamonadaceae	g__	s__	719367		5.85469	0.0507281	0.124514	0.000411369	0
p__Firmicutes	c__Bacilli	o__Lactobacillales	f__Streptococcaceae	g__Streptococcus	s__	4303294		5.87806	0.0241068	0.0685141	6.99591e-05	0
p__Fusobacteria	c__Fusobacteriia	o__Fusobacteriales	f__Fusobacteriaceae	g__Fusobacterium	s__	545299		5.94184	0.049366	0.122283	7.87872e-05	0
p__Firmicutes	c__Bacilli	o__Lactobacillales	f__Streptococcaceae	g__Streptococcus	s__	967427		5.95226	0.0244416	0.0685511	9.26568e-05	0
p__Firmicutes	c__Bacilli	o__Lactobacillales	f__Streptococcaceae	g__Streptococcus	s__infantis	996434		5.98244	0.0230041	0.0660757	6.19275e-05	0
p__Firmicutes	c__Bacilli	o__Lactobacillales	f__Streptococcaceae	g__Streptococcus	s__	4309301		5.98745	0.0165332	0.05131	4.06619e-05	0
p__Firmicutes	c__Clostridia	o__Clostridiales	f__Veillonellaceae	g__Veillonella	s__	561537		5.99256	0.115091	0.23721	1.51217e-05	0.000103348
p__Firmicutes	c__Bacilli	o__Lactobacillales	f__Streptococcaceae	g__Streptococcus	s__	1068499		6.15261	0.00909524	0.0295869	0.000143906	0
p__Proteobacteria	c__Gammaproteobacteria	o__Pasteurellales	f__Pasteurellaceae	g__	s__	1086274		6.16232	0.0246276	0.0685511	0.000698144	0
p__Proteobacteria	c__Betaproteobacteria	o__Neisseriales	f__Neisseriaceae	g__Neisseria	s__	516198		6.16282	0.0745416	0.168748	0.00367615	0
p__Firmicutes	c__Bacilli	o__Lactobacillales	f__Streptococcaceae	g__Streptococcus	s__	4332717		6.23464	0.0264576	0.0728935	7.16417e-05	0
p__Firmicutes	c__Bacilli	o__Lactobacillales	f__Streptococcaceae	g__Streptococcus	s__	4301566		6.27384	0.00664977	0.022443	8.507e-05	0
p__Firmicutes	c__Bacilli	o__Lactobacillales	f__Lactobacillaceae	g__Lactobacillus	s__	586458		6.27437	0.0119601	0.0379909	5.99778e-05	0
p__Firmicutes	c__Bacilli	o__Lactobacillales	f__Streptococcaceae	g__Streptococcus	s__	968954		6.28038	0.0020098	0.00834841	0.00459171	0.000826788
p__Proteobacteria	c__Alphaproteobacteria	o__Rhizobiales	f__Methylobacteriaceae	g__Methylobacterium	s__	574655		6.38353	0.0853612	0.185392	0.000351151	0.000105611
p__Proteobacteria	c__Gammaproteobacteria	o__Pasteurellales	f__Pasteurellaceae	g__Actinobacillus	s__parahaemolyticus	971907		6.55793	0.0196083	0.0575462	0.000422863	0
p__Bacteroidetes	c__Bacteroidia	o__Bacteroidales	f__Prevotellaceae	g__Prevotella	s__	1033687		6.61634	0.0439568	0.113032	2.86642e-05	0
p__Bacteroidetes	c__Bacteroidia	o__Bacteroidales	f__Prevotellaceae	g__Prevotella	s__melaninogenica	4308270		6.62746	0.0187686	0.0556869	0.000536833	0
p__Bacteroidetes	c__Bacteroidia	o__Bacteroidales	f__Prevotellaceae	g__Prevotella	s__pallens	2222		6.69965	0.0453607	0.114461	0	0
p__Proteobacteria	c__Betaproteobacteria	o__Burkholderiales	f__Burkholderiaceae	g__	s__	1105280		6.73163	0.116135	0.237334	0	0
p__Firmicutes	c__Bacilli	o__Lactobacillales	f__Streptococcaceae	g__Streptococcus	s__	1078207		6.79094	0.0046138	0.0161783	0.000159257	0
p__Cyanobacteria	c__Chloroplast	o__Stramenopiles	f__	g__	s__	569835		6.79986	0.0858294	0.185392	0.00121009	0
p__Firmicutes	c__Clostridia	o__Clostridiales	f__Veillonellaceae	g__Veillonella	s__dispar	757622		6.81597	0.0103348	0.0332189	0.000220822	0
p__Proteobacteria	c__Alphaproteobacteria	o__Rhizobiales	f__Bradyrhizobiaceae	g__Pseudomonas	s__carboxydohydrogena	709971		6.87201	0.0800421	0.177142	0.000128635	0
p__Proteobacteria	c__Alphaproteobacteria	o__Rhizobiales	f__Bradyrhizobiaceae	g__Bradyrhizobium	s__	1105814		6.99521	0.0662124	0.155455	5.66964e-05	0
p__Firmicutes	c__Clostridia	o__Clostridiales	f__Lachnospiraceae	g__Moryella	s__	714766		7.0047	0.101273	0.215305	9.0519e-06	0
p__Proteobacteria	c__Betaproteobacteria	o__Burkholderiales	f__Comamonadaceae	g__Aquabacterium	s__	942852		7.01597	0.0678739	0.15718	0.00114476	0
p__Firmicutes	c__Bacilli	o__Bacillales	f__Planococcaceae	g__	s__	949789		7.0183	0.0183799	0.0556602	0.000808594	0
p__Bacteroidetes	c__Flavobacteriia	o__Flavobacteriales	f__Cryomorphaceae	g__Fluviicola	s__	103229		7.11774	0.0751469	0.168748	0.000471024	0
p__Bacteroidetes	c__Bacteroidia	o__Bacteroidales	f__Porphyromonadaceae	g__Porphyromonas	s__	530164		7.19577	0.0571052	0.137664	0.00134797	0
p__Firmicutes	c__Clostridia	o__Clostridiales	f__Veillonellaceae	g__Veillonella	s__parvula	518743		7.2878	0.00772637	0.0257546	0.000292664	0
p__Firmicutes	c__Erysipelotrichi	o__Erysipelotrichales	f__Erysipelotrichaceae	g__Bulleidia	s__moorei	851938		7.54508	0.0756239	0.168748	0	0
p__Proteobacteria	c__Gammaproteobacteria	o__Pseudomonadales	f__Moraxellaceae	g__Acinetobacter	s__johnsonii	988314		7.57146	0.0163684	0.05131	0.0155265	0.000103348
p__Firmicutes	c__Clostridia	o__Clostridiales	f__Veillonellaceae	g__Veillonella	s__dispar	4340138		7.60696	0.006142	0.0209916	0.000213096	0
p__Firmicutes	c__Bacilli	o__Lactobacillales	f__Streptococcaceae	g__Streptococcus	s__	1082539		8.32954	0.00502259	0.0173859	0.00220483	0
p__Bacteroidetes	c__Flavobacteriia	o__Flavobacteriales	f__Flavobacteriaceae	g__Capnocytophaga	s__ochracea	987790		8.36313	0.0491013	0.122283	0.000409607	0
p__Actinobacteria	c__Actinobacteria	o__Actinomycetales	f__Corynebacteriaceae	g__Corynebacterium	s__	446403		9.22505	0.0681114	0.15718	0.00216455	3.52038e-05
p__Bacteroidetes	c__Bacteroidia	o__Bacteroidales	f__Prevotellaceae	g__Prevotella	s__melaninogenica	1066621		9.2959	0.00103478	0.00458018	0.00126393	0
p__Bacteroidetes	c__Bacteroidia	o__Bacteroidales	f__Prevotellaceae	g__Prevotella	s__melaninogenica	535359		9.43497	0.00399209	0.0145657	6.39824e-05	0
p__Firmicutes	c__Bacilli	o__Lactobacillales	f__Carnobacteriaceae	g__Granulicatella	s__	1059729		9.43808	0.00214784	0.00865547	0.00616294	0
p__Bacteroidetes	c__Bacteroidia	o__Bacteroidales	f__Prevotellaceae	g__Prevotella	s__	515747		9.97183	0.00866519	0.0285317	0	0
p__Actinobacteria	c__Actinobacteria	o__Actinomycetales	f__Actinomycetaceae	g__Actinomyces	s__	787709		10.0628	0.000400561	0.00193128	0.00339912	0
p__Bacteroidetes	c__Bacteroidia	o__Bacteroidales	f__Prevotellaceae	g__Prevotella	s__	530206		10.0894	0.000470874	0.00223045	0.000461491	0.000103348
p__Bacteroidetes	c__Bacteroidia	o__Bacteroidales	f__[Paraprevotellaceae]	g__[Prevotella]	s__	4310396		10.3448	0.00454498	0.0161467	0.000415337	0
p__Firmicutes	c__Clostridia	o__Clostridiales	f__Veillonellaceae	g__Veillonella	s__dispar	342427		10.9713	6.05084e-05	0.000418904	0.00383551	0
p__Proteobacteria	c__Gammaproteobacteria	o__Pasteurellales	f__Pasteurellaceae	g__Haemophilus	s__parainfluenzae	865469		10.9769	6.66829e-05	0.000439131	0.0382026	3.52038e-05
p__Firmicutes	c__Clostridia	o__Clostridiales	f__Veillonellaceae	g__Veillonella	s__	511378		11.5607	0.000172868	0.000933487	6.29299e-06	0
p__Fusobacteria	c__Fusobacteriia	o__Fusobacteriales	f__Fusobacteriaceae	g__Fusobacterium	s__	938948		11.8417	9.3156e-05	0.000558936	0.00510291	0
p__Firmicutes	c__Clostridia	o__Clostridiales	f__Veillonellaceae	g__Veillonella	s__	585419		12.3168	6.14408e-08	1.38242e-06	0.0443279	0.000103348
p__Proteobacteria	c__Gammaproteobacteria	o__Xanthomonadales	f__Xanthomonadaceae	g__	s__	1083508		12.5259	0.0358727	0.096577	0.00142519	0
p__Bacteroidetes	c__Bacteroidia	o__Bacteroidales	f__Prevotellaceae	g__Prevotella	s__melaninogenica	935742		13.4781	8.71502e-06	8.71502e-05	8.12935e-06	0
p__Proteobacteria	c__Gammaproteobacteria	o__Pseudomonadales	f__Moraxellaceae	g__Acinetobacter	s__	322927		14.552	0.0208098	0.0604157	0.00711373	0
p__Actinobacteria	c__Actinobacteria	o__Actinomycetales	f__Corynebacteriaceae	g__Corynebacterium	s__	1069816		15.6818	0.00348815	0.0130806	0.0188519	0
p__Firmicutes	c__Clostridia	o__Clostridiales	f__Veillonellaceae	g__Schwartzia	s__	676367		16.7194	0.00248452	0.00986502	0.00152347	0
p__Planctomycetes	c__Planctomycetia	o__Planctomycetales	f__Planctomycetaceae	g__Planctomyces	s__	252045		17.1196	0.00198058	0.00834841	0.00167653	0
p__Spirochaetes	c__[Leptospirae]	o__[Leptospirales]	f__Leptospiraceae	g__Turneriella	s__	4017244		17.9896	0.00322591	0.0122675	0.00307447	0
p__Planctomycetes	c__Planctomycetia	o__Gemmatales	f__Gemmataceae	g__Gemmata	s__	2339928		18.6595	0.000608857	0.00283433	0.0010071	0
p__Bacteroidetes	c__Bacteroidia	o__Bacteroidales	f__Prevotellaceae	g__Prevotella	s__	851935		19.0022	0.00134523	0.00585826	0	0
p__Bacteroidetes	c__Bacteroidia	o__Bacteroidales	f__Prevotellaceae	g__Prevotella	s__	70671		19.0387	0.00307643	0.0118662	0	0
p__Proteobacteria	c__Gammaproteobacteria	o__Xanthomonadales	f__Xanthomonadaceae	g__	s__	707290		19.0485	0.00423211	0.0152356	0	0
p__Bacteroidetes	c__[Saprospirae]	o__[Saprospirales]	f__	g__	s__	819699		19.1187	0.00035744	0.00175471	1.67784e-05	0
p__Firmicutes	c__Clostridia	o__Clostridiales	f__Clostridiaceae	g__	s__	527630		19.3541	9.03986e-05	0.000554719	0	0
p__Proteobacteria	c__Gammaproteobacteria	o__Pseudomonadales	f__Moraxellaceae	g__	s__	580411		19.3687	0.00258214	0.010104	0.00262847	0
p__Bacteroidetes	c__Sphingobacteriia	o__Sphingobacteriales	f__	g__	s__	40351		19.3726	0.000231421	0.00122517	0.000943407	0
p__Proteobacteria	c__Alphaproteobacteria	o__Sphingomonadales	f__Sphingomonadaceae	g__	s__	820086		19.4261	5.83762e-05	0.000418904	0.000213702	0
p__Proteobacteria	c__Alphaproteobacteria	o__Rhizobiales	f__Bradyrhizobiaceae	g__	s__	303643		19.4354	1.56703e-06	2.01475e-05	0.00110676	0
p__Actinobacteria	c__Actinobacteria	o__Actinomycetales	f__Corynebacteriaceae	g__Corynebacterium	s__	1047041		19.5516	6.21717e-05	0.000419659	0.00376844	0
p__Proteobacteria	c__Alphaproteobacteria	o__Rhizobiales	f__Methylobacteriaceae	g__Methylobacterium	s__	1060565		19.6006	5.61892e-06	6.32129e-05	0.00222587	0
p__Fusobacteria	c__Fusobacteriia	o__Fusobacteriales	f__Leptotrichiaceae	g__Leptotrichia	s__	31235		19.7539	0.00092516	0.00416322	0	0
p__Bacteroidetes	c__Flavobacteriia	o__Flavobacteriales	f__Flavobacteriaceae	g__Capnocytophaga	s__	664697		19.7808	0.000109165	0.000640749	0	0
p__Firmicutes	c__Bacilli	o__Lactobacillales	f__Streptococcaceae	g__Lactococcus	s__	716006		19.8486	0.000294347	0.0014995	0.00673148	0
p__Proteobacteria	c__Betaproteobacteria	o__Methylophilales	f__Methylophilaceae	g__	s__	788632		19.9336	7.85165e-05	0.000493011	0	0
p__Firmicutes	c__Clostridia	o__Clostridiales	f__Lachnospiraceae	g__Catonella	s__	122517		20.0115	6.98157e-05	0.000448815	0	0
p__Proteobacteria	c__Epsilonproteobacteria	o__Campylobacterales	f__Campylobacteraceae	g__Campylobacter	s__	32546		20.0346	0.00211616	0.00865547	0	0
p__Actinobacteria	c__Actinobacteria	o__Actinomycetales	f__Corynebacteriaceae	g__Corynebacterium	s__	1080820		20.0782	0.00166866	0.0071514	0.000546142	0
p__Firmicutes	c__Clostridia	o__Clostridiales	f__[Tissierellaceae]	g__Parvimonas	s__	1866742		20.079	6.00522e-05	0.000418904	0.000117675	0
p__Actinobacteria	c__Actinobacteria	o__Actinomycetales	f__Micrococcaceae	g__	s__	1002005		20.2405	1.84482e-05	0.00016439	0.000961302	0
p__Proteobacteria	c__Gammaproteobacteria	o__Pasteurellales	f__Pasteurellaceae	g__Actinobacillus	s__	2647328		20.3027	4.27479e-05	0.00032977	0	0
p__Fusobacteria	c__Fusobacteriia	o__Fusobacteriales	f__Leptotrichiaceae	g__Leptotrichia	s__	4306055		20.3082	0.00014282	0.000803361	0	0
p__Bacteroidetes	c__Bacteroidia	o__Bacteroidales	f__Prevotellaceae	g__Prevotella	s__	146094		20.3468	1.88744e-05	0.00016439	0.0132305	0
p__Spirochaetes	c__Spirochaetes	o__Spirochaetales	f__Spirochaetaceae	g__Treponema	s__	669126		20.4125	0.000122822	0.000705574	0	0
p__Firmicutes	c__Clostridia	o__Clostridiales	f__Lachnospiraceae	g__	s__	922397		20.4436	1.7917e-05	0.00016439	0	0
p__Bacteroidetes	c__Bacteroidia	o__Bacteroidales	f__[Paraprevotellaceae]	g__[Prevotella]	s__	2469654		20.5176	4.03962e-05	0.000320793	1.51217e-05	0
p__Firmicutes	c__Clostridia	o__Clostridiales	f__[Tissierellaceae]	g__Finegoldia	s__	505587		20.5635	0.000726973	0.00332682	0	0
p__Proteobacteria	c__Gammaproteobacteria	o__Pasteurellales	f__Pasteurellaceae	g__Aggregatibacter	s__segnis	92231		20.5734	4.5133e-05	0.000338498	0	0
p__Actinobacteria	c__Actinobacteria	o__Actinomycetales	f__Actinomycetaceae	g__Actinomyces	s__	1108638		20.6639	2.40362e-08	6.48978e-07	0.00356333	0
p__Proteobacteria	c__Betaproteobacteria	o__Neisseriales	f__Neisseriaceae	g__Kingella	s__	1020605		20.6716	2.72995e-07	5.66989e-06	0.000114393	0
p__Proteobacteria	c__Alphaproteobacteria	o__Rhizobiales	f__Methylobacteriaceae	g__Methylobacterium	s__adhaesivum	591699		20.6897	0.000245277	0.00127355	0.000696997	0
p__Proteobacteria	c__Betaproteobacteria	o__Burkholderiales	f__Comamonadaceae	g__Aquincola	s__tertiaricarbonis	940737		20.6967	1.54201e-09	5.20428e-08	4.68365e-05	0
p__Spirochaetes	c__Spirochaetes	o__Spirochaetales	f__Spirochaetaceae	g__Treponema	s__	71146		20.7419	2.89139e-05	0.000236568	0	0
p__Proteobacteria	c__Epsilonproteobacteria	o__Campylobacterales	f__Campylobacteraceae	g__Campylobacter	s__	300432		20.898	4.36791e-07	7.86224e-06	0.00175915	0
p__Actinobacteria	c__Actinobacteria	o__Actinomycetales	f__Actinomycetaceae	g__Actinomyces	s__	960871		20.9074	4.19219e-07	7.86224e-06	0	0
p__Actinobacteria	c__Actinobacteria	o__Actinomycetales	f__Actinomycetaceae	g__Actinomyces	s__	875735		20.9539	6.79692e-07	1.07951e-05	0	0
p__Proteobacteria	c__Alphaproteobacteria	o__Rhizobiales	f__	g__	s__	1140644		21.0011	0.000165276	0.000910703	0.00018879	0
p__Bacteroidetes	c__Bacteroidia	o__Bacteroidales	f__Prevotellaceae	g__Prevotella	s__	73324		21.1025	2.08175e-05	0.000175648	0.00160691	0
p__Bacteroidetes	c__Bacteroidia	o__Bacteroidales	f__Prevotellaceae	g__Prevotella	s__	239506		21.134	0.00033058	0.0016529	0	0
p__Bacteroidetes	c__Bacteroidia	o__Bacteroidales	f__Prevotellaceae	g__Prevotella	s__nigrescens	2195		21.1513	1.26825e-05	0.000122296	0	0
p__Bacteroidetes	c__Bacteroidia	o__Bacteroidales	f__[Paraprevotellaceae]	g__[Prevotella]	s__	93000		21.2891	2.78191e-08	6.82833e-07	0	0
p__Firmicutes	c__Clostridia	o__Clostridiales	f__Lachnospiraceae	g__Oribacterium	s__	749837		21.3041	6.06408e-07	1.02331e-05	1.36536e-05	0
p__Firmicutes	c__Clostridia	o__Clostridiales	f__Veillonellaceae	g__Dialister	s__	403701		21.3142	2.03205e-06	2.38544e-05	0	0
p__Bacteroidetes	c__Bacteroidia	o__Bacteroidales	f__Porphyromonadaceae	g__Porphyromonas	s__endodontalis	1938		21.5184	6.03806e-06	6.52111e-05	0.000506907	0
p__Actinobacteria	c__Coriobacteriia	o__Coriobacteriales	f__Coriobacteriaceae	g__Atopobium	s__	4451251		21.6289	1.04165e-06	1.48351e-05	0	0
p__Fusobacteria	c__Fusobacteriia	o__Fusobacteriales	f__Leptotrichiaceae	g__Leptotrichia	s__	1042850		21.7069	1.04395e-06	1.48351e-05	5.59281e-06	0
p__Bacteroidetes	c__Bacteroidia	o__Bacteroidales	f__Prevotellaceae	g__Prevotella	s__	851961		21.7098	1.89345e-06	2.32378e-05	0.000289566	0
p__Bacteroidetes	c__Bacteroidia	o__Bacteroidales	f__Prevotellaceae	g__Prevotella	s__	1004910		21.9295	9.86481e-10	3.805e-08	0.00102287	0
p__Fusobacteria	c__Fusobacteriia	o__Fusobacteriales	f__Leptotrichiaceae	g__Leptotrichia	s__	1927234		22.3286	8.46663e-06	8.71502e-05	0.00188419	0
p__Proteobacteria	c__Gammaproteobacteria	o__Pasteurellales	f__Pasteurellaceae	g__Actinobacillus	s__parahaemolyticus	893979		22.4464	4.56808e-09	1.37043e-07	0.000156644	0
p__Bacteroidetes	c__Bacteroidia	o__Bacteroidales	f__[Paraprevotellaceae]	g__[Prevotella]	s__tannerae	2714267		22.5083	1.17547e-06	1.58689e-05	8.12935e-06	0
p__Proteobacteria	c__Betaproteobacteria	o__Neisseriales	f__Neisseriaceae	g__	s__	1084952		24.1105	1.84862e-13	1.66376e-11	0.0823562	0
p__Actinobacteria	c__Actinobacteria	o__Actinomycetales	f__Micrococcaceae	g__Rothia	s__mucilaginosa	1017181		24.2402	3.6503e-14	4.92791e-12	0.0103203	0
p__Bacteroidetes	c__Bacteroidia	o__Bacteroidales	f__Prevotellaceae	g__Prevotella	s__	851822		24.2794	3.8594e-13	2.60509e-11	0.00458765	0
p__Proteobacteria	c__Alphaproteobacteria	o__Rhizobiales	f__Bradyrhizobiaceae	g__	s__	580625		24.7174	4.32122e-11	1.94455e-09	0.00275287	0
p__Bacteroidetes	c__Bacteroidia	o__Bacteroidales	f__Prevotellaceae	g__Prevotella	s__pallens	705241		24.9894	1.25287e-12	6.76549e-11	5.77574e-06	0
p__Bacteroidetes	c__Bacteroidia	o__Bacteroidales	f__Prevotellaceae	g__Prevotella	s__melaninogenica	4307391		25.4645	5.48375e-15	1.48061e-12	1.83617e-05	0

## Sheet: Table 8 RNA
Transcriptomic Differences Advanced vs. Local					Transcriptomic Differences Dicotomized Mortality at 6 months and 1 year
Local vs. Advance					Local (6 month)					Advance (6 month)
Gene.symbol	logFC	pvalue	adj.P.Val		Gene.symbol	logFC	pvalue	adj.P.Val		Gene.symbol	logFC	pvalue	adj.P.Val
Upregulated in Advanced					Upregulated in < 6 momth Survival					Upregulated in < 6 momth Survival
C15orf48	4.84455	0.000289549	0.176535		CD177	3.99197	1.00803e-05	0.0489602		CD177	3.89811	9.27531e-06	0.0456469
Upregulated in Local					Upregulated in > 6 momth Survival					Upregulated in > 6 momth Survival
XIST	-25.014	4.72283e-09	5.08602e-05		CYP1A1	-25.2722	1.67888e-15	2.4463e-11		CYP1A1	-25.2347	1.08159e-15	1.59686e-11
CHIT1	-22.227	2.06206e-08	0.000111032		XIST	-10.0047	7.38232e-08	0.000537839		XIST	-10.0897	2.99235e-08	0.000220895
CYP1A1	-22.1443	0.000203472	0.172544
GJA1	-11.2576	2.12897e-05	0.0441728
ICAM5	-10.748	0.000246741	0.176535		Local (1 year)					Advance (1 year)
PDPN	-10.6363	8.15008e-06	0.0292561		Gene.symbol	logFC	pvalue	adj.P.Val		Gene.symbol	logFC	pvalue	adj.P.Val
CDH11	-10.461	2.04454e-05	0.0441728		Upregulated in < 1 year Survival					Upregulated in >1 yr Survival
NDNF	-10.201	6.13765e-05	0.0944233		PF4	6.33903	2.61813e-05	0.128485		HLA-C	-2.93482	6.15694e-09	9.06733e-05
C6	-7.44734	0.000104543	0.125092		ALAS2	5.4888	5.18085e-05	0.128485
ADRA2A	-6.8633	2.46111e-05	0.0441728		HBA2	4.28207	4.79281e-05	0.128485
SLIT2	-6.64042	0.000456488	0.247611		HBA1	4.26013	4.39322e-05	0.128485
SULT1E1	-6.60441	0.000153748	0.150519		TUBB1	3.02439	2.87219e-06	0.0427382
CORO2B	-6.45052	0.000295072	0.176535		CPM	-3.10178	2.12656e-05	0.128485
FHOD3	-5.84033	0.000147774	0.150519		Upregulated in > 1 year Survival
ACSS3	-5.74769	7.43129e-05	0.100034		CPM	-3.10178	2.12656e-05	0.128485
POSTN	-5.58611	0.00021626	0.172544
HS6ST2	-4.91668	0.000224312	0.172544
MARVELD1	-4.60511	0.000288443	0.176535
HLF	-4.56224	0.000459858	0.247611

## Sheet: Table 9 RNA SPT v BPT
Gene.symbol	logFC	pvalue	adj.P.Val
Upregulated in SPT
MUC7	3.67077	5.226e-05	0.0210258
PRB1	3.1335	4.4725e-05	0.0193725
PRB4	3.00374	2.61748e-05	0.0167599
SPRR2A	2.80448	2.87127e-06	0.006282
RNA5S6	2.74968	6.25802e-05	0.0220255
C6orf58	2.68047	1.15824e-05	0.0113716
CSF3	2.6736	2.1222e-09	3.12537e-05
SPRR2E	2.51107	0.00131164	0.133184
PRB3	2.41904	2.05209e-05	0.0151106
PF4	2.38256	0.00256682	0.179909
PRH2	2.36341	2.22852e-07	0.00109398
SCGB3A2	2.3147	0.00191776	0.150228
LOC644936	2.23019	5.8085e-09	4.27709e-05
ITGA2B	2.20257	2.50168e-05	0.0167465
IGKV1D-12	2.13657	0.000562139	0.0877531
PPBP	2.09098	0.00288217	0.191164
PRR4	2.04652	1.5644e-06	0.00575974
DMBT1	2.02161	3.13695e-06	0.006282
C11orf96	2.01836	0.000209856	0.0523822
CAPN14	1.96629	6.13397e-05	0.0220255
CCL20	1.88046	4.34713e-05	0.0193725
NRGN	1.87986	8.75274e-05	0.0283816
IGKV3D-20	1.78003	0.00378505	0.216306
CXCL2	1.73566	3.83907e-06	0.006282
RNU1-2	1.70392	1.76979e-05	0.0137178
PRH1	1.69147	6.43102e-05	0.0220255
S100A12	1.68092	0.00160504	0.141228
NR4A3	1.65204	0.000278397	0.0621205
FOSL1	1.64482	0.000180982	0.0484604
GP2	1.63051	0.000240552	0.0562318
DUSP5	1.60726	6.09493e-06	0.00816001
DUSP2	1.57297	3.75462e-06	0.006282
LINC00322	1.55372	6.35637e-05	0.0220255
TNNC1	1.53221	3.45956e-05	0.01887
SFTA1P	1.52636	0.00315817	0.199615
LYPD2	1.5098	0.0014676	0.138559
LTF	1.48959	9.74796e-06	0.0102542
SLCO1B3	1.48467	0.00327875	0.199856
CXCL8	1.47638	3.90492e-05	0.0193725
EGR3	1.42397	0.00182466	0.145253
DLC1	1.4199	0.000132025	0.0391123
RNASE7	1.3947	0.00162067	0.141228
NFE2	1.38262	0.00165202	0.141263
CEACAM4	1.37311	0.00284266	0.189869
MMP10	1.36945	0.00118187	0.129117
CD200R1L	1.36362	0.00208054	0.157937
PEG10	1.34303	0.000663245	0.0939194
RND1	1.33923	8.66509e-06	0.0102542
CYR61	1.32974	0.000411653	0.0795576
AREG	1.28775	0.00125313	0.130885
THBS1	1.28317	0.00100095	0.123189
LIF	1.27894	3.66925e-05	0.019299
LINC01101	1.26998	0.00306077	0.19702
FCGBP	1.26295	0.000513227	0.0821553
CXCL3	1.25588	0.000610181	0.0907691
NR4A1	1.24757	0.000916601	0.119762
RASD1	1.23607	0.00343144	0.205905
TUFT1	1.23306	3.42781e-05	0.01887
NCOA7	1.21496	0.000203096	0.051569
AVPI1	1.19517	2.24303e-05	0.0157301
DPP4	1.18865	0.00134427	0.133184
MMP13	1.18557	0.00204096	0.156548
EMP1	1.18428	0.0030852	0.197219
HIF3A	1.18329	0.00459741	0.238879
ACTG1P4	1.18039	5.2825e-05	0.0210258
MAFF	1.17454	0.000524275	0.0830216
CXCL1	1.16124	4.02571e-05	0.0193725
CXCR2	1.15013	0.00180367	0.145239
KCNJ12	1.14232	0.000603601	0.0907064
TNFAIP3	1.13951	0.00016975	0.0462947
NFKBIZ	1.1342	5.64312e-05	0.0213093
ZC3H12A	1.13102	4.31373e-05	0.0193725
BMP2	1.12275	0.00335971	0.203615
CXCL6	1.12265	0.00150004	0.13977
TUBB1	1.10906	0.000503296	0.0821553
TSLP	1.101	0.0016731	0.141263
LMCD1	1.09424	7.91739e-05	0.0264999
MGP	1.09155	0.00169213	0.141263
PPP1R16B	1.08795	0.00318528	0.199856
MGAM	1.0826	0.000252085	0.0571147
GPRC5A	1.08113	0.000317615	0.0677901
ERRFI1	1.07925	0.00160258	0.141228
ADAM32	1.06802	0.000471816	0.0821553
TNFRSF12A	1.068	0.000745805	0.101699
MTUS2	1.05924	0.00491222	0.246937
DKK1	1.05562	0.00416985	0.224764
HBEGF	1.05111	0.0029091	0.19126
PTMAP11	1.05013	0.00130088	0.133184
ATF3	1.04282	0.00137231	0.133184
MALL	1.03939	0.000343206	0.0711886
TM4SF1	1.03915	0.000463052	0.0821553
AMOTL2	1.01845	0.000445753	0.0820576
NR4A2	1.01557	0.00227983	0.167875
PMAIP1	1.01429	0.00370649	0.214904
CDC42EP1	1.01202	0.00151405	0.13977
ADM	1.01176	0.00161983	0.141228
NFKBIA	1.01008	9.87591e-05	0.0309452
CTGF	1.00973	0.00231605	0.169694
TPM1	1.00964	0.000290168	0.0628427
FTO-IT1	1.00925	0.00156814	0.141228
MYC	1.00653	0.00188419	0.149185
ARG2	1.00519	0.00123286	0.130885
ACTBL2	1.00381	0.00430219	0.229559
SRF	0.99617	0.000405226	0.0795576
CSRNP1	0.990239	0.000901981	0.119671
SLC6A20	0.987478	0.00356888	0.210465
TMEM130	0.985535	0.00404549	0.219845
BTNL9	0.973186	0.00289466	0.191164
SYT12	0.97136	0.00253921	0.179783
CYP2A6	0.970123	0.00281651	0.189869
IRS1	0.968587	0.00100849	0.123189
RNF39	0.957936	0.00194847	0.151795
TCIM	0.954389	0.0010304	0.124383
BTNL8	0.953535	0.0026865	0.183604
MRVI1	0.946755	0.00167944	0.141263
MIR17HG	0.946003	0.00483523	0.244702
BRE-AS1	0.945389	0.00380604	0.216306
C2orf27A	0.945227	0.00416239	0.224764
TNS4	0.945156	0.00215775	0.161306
PTGS2	0.932978	0.00392416	0.217559
VASN	0.932343	0.00382631	0.216306
SIK1	0.931243	0.00463907	0.238879
IL1R1	0.926669	0.000706616	0.099108
MMP25	0.923817	0.00365336	0.21266
FILIP1L	0.9186	0.0040068	0.219178
CD55	0.916953	0.00137462	0.133184
SLC25A25	0.909266	0.00133734	0.133184
CLCF1	0.896171	0.00362673	0.21266
TMEM217	0.888803	0.00118264	0.129117
RND3	0.887135	0.000601355	0.0907064
PPP1R12B	0.885336	0.00146773	0.138559
PLK2	0.884832	0.000504338	0.0821553
PAX8	0.869351	0.00463387	0.238879
KCNK5	0.868469	0.00170561	0.141263
RPL21P28	0.868306	0.00120069	0.129117
TGFB2	0.867263	0.00131114	0.133184
MAP3K8	0.865858	0.00119596	0.129117
ITPRIP	0.865478	0.00148718	0.139501
SPRY4	0.863631	0.00311748	0.197893
SERTAD1	0.861365	0.000504191	0.0821553
TRIB1	0.860708	0.00137417	0.133184
OVOL1	0.859116	0.00469573	0.240118
PIP	0.84479	0.00114695	0.129117
LOC100130331	0.843605	0.00300904	0.195216
IFITM2	0.839207	0.0010617	0.124656
SLPI	0.837832	0.00294336	0.192653
OSMR	0.836105	0.00263573	0.181385
IL1R2	0.83596	0.00218944	0.16203
ACTA2	0.832245	0.00250907	0.179783
PTP4A1	0.828977	0.00217704	0.161926
NCAM1	0.826723	0.00501672	0.249599
LBH	0.824335	0.00180476	0.145239
HES1	0.823107	0.00365292	0.21266
CLDN23	0.822227	0.00382672	0.216306
YWHAEP1	0.821366	0.000982692	0.123189
RPL7	0.819197	0.00056656	0.0877531
JOSD1	0.819146	0.000510797	0.0821553
MYL9	0.817626	0.00255487	0.179909
C1orf116	0.813626	0.00106652	0.124656
NRARP	0.810947	0.00209124	0.157937
IRS2	0.80111	0.0030636	0.19702
SLC6A14	0.796839	0.00445995	0.234577
VCL	0.790642	0.00252973	0.179783
LRRC20	0.790571	0.00258084	0.179909
STK17B	0.789693	0.00309348	0.197219
PDP1	0.789666	0.00323044	0.199856
BCL10	0.782667	0.00111757	0.127585
FHL2	0.781057	0.00269291	0.183604
EFNA1	0.778472	0.000956835	0.123189
ICAM3	0.772863	0.00120113	0.129117
TAGLN	0.768953	0.00381217	0.216306
SLC38A2	0.768215	0.00384489	0.216306
LINC00987	0.76401	0.00159046	0.141228
TPM4	0.762285	0.00195838	0.151795
CNN2	0.75838	0.00139459	0.134236
CDKN1A	0.747755	0.00155256	0.141139
MTRNR2L9	0.74499	8.86502e-05	0.0283816
ZNF165	0.739144	0.00123861	0.130885
BANF1P3	0.730366	0.00475143	0.242125
MYL6P5	0.728939	0.00170739	0.141263
WFDC21P	0.726852	0.00111352	0.127585
SERPINB8	0.723162	0.00439785	0.233817
RPL37	0.721205	0.00137248	0.133184
FAM222A	0.719126	0.00494576	0.247142
FLJ46906	0.710146	0.00174242	0.142944
KDM7A-DT	0.709041	0.00356031	0.210465
RPL23P8	0.702659	0.00124914	0.130885
ZSWIM4	0.700546	0.0026302	0.181385
PINLYP	0.695447	0.00401834	0.219178
MEF2D	0.689438	0.00452525	0.236324
CD99P1	0.686451	0.0018246	0.145253
DDIT3	0.671089	0.00174713	0.142944
AEN	0.66471	0.00322819	0.199856
NOP14-AS1	0.664195	0.00324814	0.199856
FOXN3-AS1	0.659161	0.00463762	0.238879
RPS27	0.649338	0.00283523	0.189869
TMEM106C	0.645385	0.00503789	0.249808
BIK	0.642084	0.00327647	0.199856
PXMP2	0.62978	0.00423307	0.226692
SHB	0.625534	0.00480653	0.244089
RPL4	0.619595	0.00319111	0.199856
MTRNR2L2	0.614448	0.000766193	0.10352
TACSTD2	0.608168	0.00387424	0.216829
NFKBIE	0.599624	0.00384819	0.216306
EIF1	0.572687	0.00357277	0.210465
ZNF394	0.571327	0.00236187	0.172194
VMP1	0.567161	0.00388693	0.216829
ATF4	0.564226	0.00253073	0.179783
ZFAS1	0.554175	0.00394994	0.217868
Upregulated in BPT
ENG	-0.788488	0.00341373	0.205905
TIMP2	-0.83317	0.00167431	0.141263
GPD1	-0.843896	0.00445311	0.234577
2019-03-01	-0.890773	0.00491291	0.246937
PLIN2	-0.913974	0.00300596	0.195216
IFI30	-0.940675	0.00143886	0.137598
TREM2	-0.960955	0.0028253	0.189869
NCKAP1L	-0.961661	0.00379655	0.216306
EMILIN2	-0.994089	0.00106139	0.124656
IGSF6	-0.995187	0.00449875	0.235776
PARVB	-0.997463	0.00133335	0.133184
GPR34	-1.00083	0.00495056	0.247142
TGFBR3L	-1.01363	0.00245264	0.177059
DAB2	-1.02559	0.000379133	0.0764861
LY86	-1.03432	0.00418179	0.224764
DOK2	-1.045	0.00328411	0.199856
PMP22	-1.04703	0.00151852	0.13977
ALOX5	-1.05178	0.0024433	0.177059
PPARG	-1.06265	0.00164539	0.141263
CCR1	-1.09402	0.00468189	0.240118
RENBP	-1.09445	0.000486372	0.0821553
SMIM25	-1.10302	0.00169411	0.141263
CD68	-1.12964	0.000503805	0.0821553
GPRIN3	-1.13329	0.00442618	0.234476
SNX10	-1.13965	0.00117499	0.129117
SLAMF8	-1.14502	0.000362752	0.0741979
HAVCR2	-1.15991	0.000644566	0.0937919
FGD5	-1.1618	0.000406037	0.0795576
NRROS	-1.18553	0.00326528	0.199856
FLVCR2	-1.18623	0.000617147	0.0908872
PTPRO	-1.20218	0.000649608	0.0937919
SLC11A1	-1.20398	0.00115761	0.129117
ACP5	-1.22408	0.000115647	0.0354821
FCGR1CP	-1.23796	0.000136	0.0391123
STARD8	-1.24459	0.000730985	0.100609
P2RX7	-1.24512	0.000662765	0.0939194
OSCAR	-1.25688	0.000918934	0.119762
C1QB	-1.26594	0.00101215	0.123189
ATP6V0D2	-1.28253	0.000470336	0.0821553
C1QC	-1.2957	0.000284189	0.0624664
PDCD1LG2	-1.30425	0.00398379	0.218915
CYBB	-1.31887	0.00100442	0.123189
MS4A4A	-1.33102	0.00178635	0.145239
ADTRP	-1.33198	0.00044039	0.0820576
SCO2	-1.34155	0.00343943	0.205905
FCGR1A	-1.35345	0.000249957	0.0571147
C1QA	-1.37362	0.000185266	0.0487215
CPED1	-1.39899	0.000841758	0.112696
PDE1B	-1.41515	0.000728134	0.100609
CD163	-1.42395	0.000325456	0.0684713
LAIR1	-1.44661	1.26945e-05	0.011529
CLEC5A	-1.45187	0.000993172	0.123189
TFEC	-1.45466	0.000983956	0.123189
MS4A7	-1.46637	0.000235751	0.0559984
HK3	-1.49204	0.00208864	0.157937
KCNA3	-1.49633	0.000425874	0.0804083
TRPV2	-1.4981	1.40226e-05	0.011529
CCL18	-1.54	0.00284926	0.189869
LOC100506585	-1.55671	4.96459e-05	0.0208896
SIGLEC1	-1.56358	0.000490414	0.0821553
GPNMB	-1.58217	3.03369e-05	0.0186155
APOC1P1	-1.5962	0.00352279	0.210041
PLA2G7	-1.61085	4.46721e-05	0.0193725
MCEMP1	-1.62896	0.00392957	0.217559
FLT1	-1.64227	0.00200422	0.154535
COLEC12	-1.6446	0.00189922	0.149571
VSIG4	-1.65129	0.000199412	0.0515217
OLR1	-1.66935	0.000482663	0.0821553
PCOLCE2	-1.72424	0.0015894	0.141228
STAC	-1.75783	0.000223617	0.0541161
LPL	-1.8108	0.00212636	0.15977
APOC1	-1.81668	0.000224152	0.0541161
MSR1	-1.85337	5.52054e-05	0.0213093
APOC2	-1.85618	0.000157053	0.04364
MMP12	-1.86006	0.00108356	0.12565
ADAMTSL4	-1.8638	2.96071e-06	0.006282
SLCO2B1	-1.86462	5.46655e-06	0.0080506
HTRA4	-1.92116	0.000572031	0.0877531
ADGRE1	-1.98748	0.000133905	0.0391123
INHBA	-1.98878	0.000415966	0.0795576
MARCO	-2.00145	0.000138103	0.0391123
DCSTAMP	-2.05907	0.00258984	0.179909
APOE	-2.10174	1.40912e-05	0.011529
TMEM150B	-2.11469	0.00136671	0.133184
FN1	-2.34291	9.61347e-06	0.0102542
MRC1	-2.35389	3.40348e-05	0.01887
FFAR4	-2.54589	0.00153481	0.140392
CHIT1	-2.88893	0.00105236	0.124656

## Sheet: Table 10 Veillonella multi-omic
Phylum	Class	Order	Family	Genus	Specie	OTU#		rank		pathway (L1)	(L2)	(L3)
p__Firmicutes	c__Clostridia	o__Clostridiales	f__Veillonellaceae	g__Veillonella	s__	585419		8.11778		Cell_adhesion_molecules	ITGAM,_CD11b	integrin_alpha_M
p__Firmicutes	c__Clostridia	o__Clostridiales	f__Veillonellaceae	g__Veillonella	s__	585419		8.11778		Cell_adhesion_molecules	ITGAM,_CD11b	integrin_alpha_M
p__Firmicutes	c__Clostridia	o__Clostridiales	f__Veillonellaceae	g__Veillonella	s__	585419		0.533289		Cytokines_and_growth_factors	CCL20	C-C_motif_chemokine_20
p__Firmicutes	c__Clostridia	o__Clostridiales	f__Veillonellaceae	g__Veillonella	s__	585419		0.533289		Cytokine-cytokine_receptor_interaction	CCL20	C-C_motif_chemokine_20
p__Firmicutes	c__Clostridia	o__Clostridiales	f__Veillonellaceae	g__Veillonella	s__	585419		0.533289		Chemokine_signaling_pathway	CCL20	C-C_motif_chemokine_20
p__Firmicutes	c__Clostridia	o__Clostridiales	f__Veillonellaceae	g__Veillonella	s__	585419		0.533289		IL-17_signaling_pathway	CCL20	C-C_motif_chemokine_20
p__Firmicutes	c__Clostridia	o__Clostridiales	f__Veillonellaceae	g__Veillonella	s__	585419		0.533289		TNF_signaling_pathway	CCL20	C-C_motif_chemokine_20
p__Firmicutes	c__Clostridia	o__Clostridiales	f__Veillonellaceae	g__Veillonella	s__	585419		0.522848		Cytokines_and_growth_factors	CSF3,_GCSF	granulocyte_colony-stimulating_factor
p__Firmicutes	c__Clostridia	o__Clostridiales	f__Veillonellaceae	g__Veillonella	s__	585419		0.522848		Jak-STAT_signaling_pathway	CSF3,_GCSF	granulocyte_colony-stimulating_factor
p__Firmicutes	c__Clostridia	o__Clostridiales	f__Veillonellaceae	g__Veillonella	s__	585419		0.522848		PI3K-Akt_signaling_pathway	CSF3,_GCSF	granulocyte_colony-stimulating_factor
p__Firmicutes	c__Clostridia	o__Clostridiales	f__Veillonellaceae	g__Veillonella	s__	585419		0.510679		Cell_adhesion_molecules_(CAMs)	NRCAM	neuronal_cell_adhesion_molecule
p__Firmicutes	c__Clostridia	o__Clostridiales	f__Veillonellaceae	g__Veillonella	s__	585419		0.510679		Cell_adhesion_molecules_(CAMs)	NRCAM	neuronal_cell_adhesion_molecule
p__Firmicutes	c__Clostridia	o__Clostridiales	f__Veillonellaceae	g__Veillonella	s__	585419		0.479534		Jak-STAT_signaling_pathway	IL19	interleukin_19
p__Firmicutes	c__Clostridia	o__Clostridiales	f__Veillonellaceae	g__Veillonella	s__	585419		0.476395		Eukaryotes	LSU5S	large_subunit_ribosomal_RNA,_5S
p__Firmicutes	c__Clostridia	o__Clostridiales	f__Veillonellaceae	g__Veillonella	s__	585419		0.472144		TGF-beta_signaling_pathway	DCN	decorin
p__Firmicutes	c__Clostridia	o__Clostridiales	f__Veillonellaceae	g__Veillonella	s__	585419		0.466218		Cell_adhesion_molecules_(CAMs)	CD34	CD34_antigen
p__Firmicutes	c__Clostridia	o__Clostridiales	f__Veillonellaceae	g__Veillonella	s__	585419		0.466218		Cell_adhesion_molecules_(CAMs)	CD34	CD34_antigen
p__Firmicutes	c__Clostridia	o__Clostridiales	f__Veillonellaceae	g__Veillonella	s__	585419		0.436127		Intestinal_immune_network_for_IgA_production	CXCL12	C-X-C_motif_chemokine_12
p__Firmicutes	c__Clostridia	o__Clostridiales	f__Veillonellaceae	g__Veillonella	s__	585419		0.428172		Cell_adhesion_molecules	CDH2,_CDHN,_CD325	cadherin_2,_type_1,_N-cadherin
p__Firmicutes	c__Clostridia	o__Clostridiales	f__Veillonellaceae	g__Veillonella	s__	585419		0.428172		Cell_adhesion_molecules_(CAMs)	CDH2,_CDHN,_CD325	cadherin_2,_type_1,_N-cadherin
p__Firmicutes	c__Clostridia	o__Clostridiales	f__Veillonellaceae	g__Veillonella	s__	585419		0.428172		Cell_adhesion_molecules	CDH2,_CDHN,_CD325	cadherin_2,_type_1,_N-cadherin
p__Firmicutes	c__Clostridia	o__Clostridiales	f__Veillonellaceae	g__Veillonella	s__	585419		0.428172		Cell_adhesion_molecules_(CAMs)	CDH2,_CDHN,_CD325	cadherin_2,_type_1,_N-cadherin
p__Firmicutes	c__Clostridia	o__Clostridiales	f__Veillonellaceae	g__Veillonella	s__	585419		0.366156		Epithelial_cell_signaling_in_Helicobacter_pylori_infection	JAM3	junctional_adhesion_molecule_3
p__Firmicutes	c__Clostridia	o__Clostridiales	f__Veillonellaceae	g__Veillonella	s__	585419		0.324272		Bacterial_invasion_of_epithelial_cells	CAV1	caveolin_1
p__Firmicutes	c__Clostridia	o__Clostridiales	f__Veillonellaceae	g__Veillonella	s__	585419		0.302147		Eukaryotes	Large_subunit	RP-L9e,_RPL9
